# Supplementary material for: Integration of sex and gender in a continuing professional development course on diabetes and depression: a mixed methods feasibility study
Source: PubMed Central journal article supplement — BMJ Open. 2022 Apr 22;12(4):e050890. doi: 10.1136/bmjopen-2021-050890 (PMC9036429; doi:10.1136/bmjopen-2021-050890), 2022-04-22
Supplement: bmjopen-2021-050890.draft_revisions.pdf [file bmjopen-2021-050890.draft_revisions.pdf]

# BMJ Open

BMJ Open is committed to open peer review. As part of this commitment we make the peer review history of every article we publish publicly available.

When an article is published we post the peer reviewers' comments and the authors' responses online. We also post the versions of the paper that were used during peer review. These are the versions that the peer review comments apply to.

The versions of the paper that follow are the versions that were submitted during the peer review process. They are not the versions of record or the final published versions. They should not be cited or distributed as the published version of this manuscript.

BMJ Open is an open access journal and the full, final, typeset and author-corrected version of record of the manuscript is available on our site with no access controls, subscription charges or pay-per-view fees (<http://bmjopen.bmj.com>).

If you have any questions on BMJ Open's open peer review process please email [info.bmjopen@bmj.com](mailto:info.bmjopen@bmj.com)

# BMJ Open

## Integration of Sex and Gender in a Continuing Professional Development Course on Diabetes and Depression: A Mixed Methods Feasibility study

|                               |                                                                                                                                                                                                                                                                                                                                                                                                                                                                                                                                                                                                                                                                                                                                                                                                                                                                                                                                                                                                                                                                                                                                                                                                                                                                     |
|-------------------------------|---------------------------------------------------------------------------------------------------------------------------------------------------------------------------------------------------------------------------------------------------------------------------------------------------------------------------------------------------------------------------------------------------------------------------------------------------------------------------------------------------------------------------------------------------------------------------------------------------------------------------------------------------------------------------------------------------------------------------------------------------------------------------------------------------------------------------------------------------------------------------------------------------------------------------------------------------------------------------------------------------------------------------------------------------------------------------------------------------------------------------------------------------------------------------------------------------------------------------------------------------------------------|
| Journal:                      | <i>BMJ Open</i>                                                                                                                                                                                                                                                                                                                                                                                                                                                                                                                                                                                                                                                                                                                                                                                                                                                                                                                                                                                                                                                                                                                                                                                                                                                     |
| Manuscript ID                 | bmjopen-2021-050890                                                                                                                                                                                                                                                                                                                                                                                                                                                                                                                                                                                                                                                                                                                                                                                                                                                                                                                                                                                                                                                                                                                                                                                                                                                 |
| Article Type:                 | Original research                                                                                                                                                                                                                                                                                                                                                                                                                                                                                                                                                                                                                                                                                                                                                                                                                                                                                                                                                                                                                                                                                                                                                                                                                                                   |
| Date Submitted by the Author: | 02-Mar-2021                                                                                                                                                                                                                                                                                                                                                                                                                                                                                                                                                                                                                                                                                                                                                                                                                                                                                                                                                                                                                                                                                                                                                                                                                                                         |
| Complete List of Authors:     | Deom Tardif, Alèxe; VITAM – Centre de recherche en santé durable, Centre intégré universitaire de santé et services sociaux; Université Laval, Department of Social and Preventative Medicine<br>Gogovor, Amédé ; Knowledge Translation and Implementation component of the Quebec SPOR-SUPPORT Unit; Université Laval, Department of Family Medicine and Emergency Medicine<br>Guay-Bélanger, Sabrina ; VITAM – Centre de recherche en santé durable, Centre intégré universitaire de santé et services sociaux; Tier 1 Canada Research Chair in Shared Decision Making and Knowledge Translation, Université Laval<br>Audet, Denis; University Family Medicine Group Saint-François-d'Assise<br>Parent, Nicole; Médecins francophones du Canada<br>Gaudreau, André; Patient-partner<br>Remy-Lamarche, Danièle; Patient-Partner<br>Vigneault, Luc; Patient-Partner<br>Ngueta, Gérard; VITAM - Centre de recherche en santé durable, Centre intégré universitaire de santé et services sociaux<br>Légaré, France; Université Laval, Department of Family Medicine and Emergency Medicine; Tier 1 Canada Research Chair in Shared Decision Making and Knowledge Translation, Université Laval<br>mATrICES-F Group, the; VITAM - Centre de recherche en santé durable |
| Keywords:                     | EDUCATION & TRAINING (see Medical Education & Training), PUBLIC HEALTH, PRIMARY CARE                                                                                                                                                                                                                                                                                                                                                                                                                                                                                                                                                                                                                                                                                                                                                                                                                                                                                                                                                                                                                                                                                                                                                                                |
|                               |                                                                                                                                                                                                                                                                                                                                                                                                                                                                                                                                                                                                                                                                                                                                                                                                                                                                                                                                                                                                                                                                                                                                                                                                                                                                     |

SCHOLARONE™  
Manuscripts

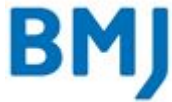

I, the Submitting Author has the right to grant and does grant on behalf of all authors of the Work (as defined in the below author licence), an exclusive licence and/or a non-exclusive licence for contributions from authors who are: i) UK Crown employees; ii) where BMJ has agreed a CC-BY licence shall apply, and/or iii) in accordance with the terms applicable for US Federal Government officers or employees acting as part of their official duties; on a worldwide, perpetual, irrevocable, royalty-free basis to BMJ Publishing Group Ltd ("BMJ") its licensees and where the relevant Journal is co-owned by BMJ to the co-owners of the Journal, to publish the Work in this journal and any other BMJ products and to exploit all rights, as set out in our [licence](#).

The Submitting Author accepts and understands that any supply made under these terms is made by BMJ to the Submitting Author unless you are acting as an employee on behalf of your employer or a postgraduate student of an affiliated institution which is paying any applicable article publishing charge ("APC") for Open Access articles. Where the Submitting Author wishes to make the Work available on an Open Access basis (and intends to pay the relevant APC), the terms of reuse of such Open Access shall be governed by a Creative Commons licence – details of these licences and which [Creative Commons](#) licence will apply to this Work are set out in our licence referred to above.

Other than as permitted in any relevant BMJ Author's Self Archiving Policies, I confirm this Work has not been accepted for publication elsewhere, is not being considered for publication elsewhere and does not duplicate material already published. I confirm all authors consent to publication of this Work and authorise the granting of this licence.

1  
2  
3 **Integration of Sex and Gender in a Continuing Professional Development Course on**  
4 **Diabetes and Depression: A Mixed Methods Feasibility study**  
5

6  
7 Deom Tardif A<sup>1,2,3</sup>, Gogovor, A<sup>1,3,4,5</sup>, Guay-Bélanger S<sup>1,3</sup>, Audet D<sup>6</sup>, Parent N<sup>7</sup>, Gaudreau  
8 A<sup>8</sup>, Rémy-Lamarche D<sup>8</sup>, Vigneault L<sup>8</sup>, Ngueta G<sup>1</sup>, Légaré F<sup>1,3,4,5</sup> and the mATrICES-F  
9  
10 Group  
11

12  
13 <sup>1</sup>VITAM – Centre de recherche en santé durable, Centre intégré universitaire de santé et  
14 services sociaux de la Capitale-Nationale, Quebec City, Quebec, Canada  
15

16  
17 <sup>2</sup>Department of Social and Preventative Medicine, Faculty of Medicine, Université Laval,  
18 Quebec City, Quebec, Canada  
19

20  
21 <sup>3</sup>Tier 1 Canada Research Chair in Shared Decision Making and Knowledge Translation,  
22 Université Laval, Quebec City, Quebec, Canada  
23

24  
25 <sup>4</sup>Department of Family Medicine and Emergency Medicine, Faculty of Medicine,  
26 Université Laval, Quebec City, Quebec, Canada  
27

28  
29 <sup>5</sup>Quebec SPOR Support Unit, Quebec City, Quebec, Canada  
30

31  
32 <sup>6</sup>University Family Medicine Group Saint-François-d'Assise, Quebec City, Quebec,  
33 Canada  
34

35  
36 <sup>7</sup>Médecins francophones du Canada, Montreal, Quebec, Canada  
37

38  
39 <sup>8</sup>Patient Partner, Quebec, Canada  
40  
41  
42  
43  
44  
45  
46  
47  
48  
49  
50  
51  
52  
53  
54  
55  
56  
57  
58  
59  
60

**Collaborators mATrICES-F Group:**

Alèxe Deom Tardif, Université Laval

Amédé Gogovor, Université Laval

André Bilodeau, Hôpital Montfort

André Bussièrès, McGill University

André Gaudreau, Patient-partner

Audrey Ferron Parayre, University of Ottawa

Caroline Jose, Université de Moncton

Danièle Remy-Lamarche, Patient-partner

Dawn Stacey, University of Ottawa

Denis Audet, University Family Medicine Group Saint-François-d'Assise

Denis Prud'homme, Hôpital Montfort

France Légaré, Université Laval

Francine Borduas, Médecins francophones du Canada

Gerard Ngueta, VITAM – Centre de recherche en santé durable

Geneviève Roch, Université Laval

Hélène Lee-Gosselin, Université Laval

Laurie Laplanche, Université Laval

Luc Vigneault, Patient-partner

Maman Joyce Dogba, Université Laval

Marie-Claude Tremblay, Université Laval

Marie-Pierre Gagnon, Université Laval

1  
2  
3 Nicole Parent, Médecins francophones du Canada

4  
5 Sabrina Guay-Bélanger, VITAM – Centre de recherche en santé durable

6  
7  
8 Sophie Desroches, Université Laval

9  
10 Valérie Borde, Centre DECLIC

11  
12  
13 **Corresponding author:**

14  
15 France Légaré, BSc Arch, MD, MSc, PhD, CCFP, FCFP.

16  
17 VITAM – Centre de recherche en santé durable

18  
19 Pavillon Landry-Poulin, entrée A-12, bureau A-4574

20  
21 2525, chemin de la Canardière

22  
23 Quebec City, Quebec, G1J 0A4, Canada

24  
25 Email: [France.legare@mfa.ulaval.ca](mailto:France.legare@mfa.ulaval.ca)

26  
27  
28  
29  
30  
31  
32 **Email addresses:**

33  
34 ADT: alexe.deom-tardif.1@ulaval.ca

35  
36 AGo: amede.gogovor.1@ulaval.ca

37  
38 SGB: sabrina.guay-belanger.ciusscn@ssss.gouv.qc.ca

39  
40 DA: [audet\\_denis@videotron.ca](mailto:audet_denis@videotron.ca)

41  
42 NP: nparent@medecinsfrancophones.ca

43  
44 AGa: andrepositif@outlook.com

45  
46 DRL: remy\_lamarche.daniele@videotron.ca

47  
48 LV: luc.vigneault2@gmail.com

49  
50 GN: gerard.ngueta.ciusscn@ssss.gouv.qc.ca

## Abstract

**Objectives** Assess the feasibility and impact of a continuous professional development (CPD) course on type-2 diabetes and depression on health professionals' intention to include sex and gender considerations in patient care.

**Design and setting** In collaboration with CPD organisations and patient-partners, we conducted a mixed-methods feasibility controlled trial with post-intervention measures in three Canadian provinces.

**Participants** Of 178 eligible health professionals, 127 completed questionnaires and 67 participated in semi-structured group discussions.

**Intervention and comparator** An interactive one-hour CPD course, co-designed with patient-partners, on diabetes and depression with sex and gender considerations (intervention) was compared to a similar course without these considerations (comparator).

**Outcomes** Feasibility of recruitment and retention of CPD organisations and patient-partners throughout the study; adherence to planned activities; health professionals' intention to include sex and gender considerations in patient care as measured by the CPD-Reaction questionnaire; and barriers and facilitators using the Theoretical Domains Framework.

**Results** All recruited CPD organisations and patient-partners remained engaged throughout the study. All planned CPD courses occurred. Overall, 71% of eligible health professionals participated (63% under 44 years old; 79.5% female; 67.7% practising in French; 66.9% practising in Quebec; 78.8% in urban practice). After training, mean intention scores for the intervention (n=49) and control groups (n=78) were  $5.65 \pm 0.19$  and  $5.19 \pm 0.15$ , respectively. Mean difference was  $-0.47$  (CI  $-0.95$  to  $0.01$ ;  $p=0.06$ ). Adjusted for age, sex and practice settings, mean difference was  $-0.57$  (CI  $-1.09$  to  $0.05$ ;  $p=0.03$ ). We identified eight Theoretical Domains related to barriers and six related to facilitators for providing sex- and gender-adapted diabetes and depression care.

**Conclusions** CPD training on diabetes and depression that includes sex and gender considerations is feasible and, compared to CPD training that does not, may prompt health

1  
2  
3 professionals to modify their care. Addressing identified barriers and facilitators could  
4 increase intention.  
5

6  
7 **Registration number:** NCT03928132 with ClinicalTrials.gov.  
8

9  
10 **Keywords:** Sex and gender, knowledge translation, continuous professional development,  
11 diabetes, depression, patient engagement, Theory of Planned Behaviour, Theoretical  
12 Domains, COM-B  
13  
14  
15  
16  
17  
18  
19  
20  
21  
22  
23  
24  
25  
26  
27  
28  
29  
30  
31  
32  
33  
34  
35  
36  
37  
38  
39  
40  
41  
42  
43  
44  
45  
46  
47  
48  
49  
50  
51  
52  
53  
54  
55  
56  
57  
58  
59  
60



### Strengths and limitations of this study

- Continuous professional development (CPD) courses that included sex and gender considerations were co-designed with patients experiencing diabetes and/or depression.
- Outcome measures were informed by theory.
- This mixed-methods controlled trial used post-intervention measures only as pre-intervention measures were not feasible. Although randomized allocation of participants was not possible, it was feasible to conduct a mixed-methods controlled trial.

## INTRODUCTION

A variety of research initiatives are attempting to reduce health inequities between men and women (1, 2). Research that includes sex- and gender-based analysis results in more accurate evidence, more relevant recommendations, more specifically-targeted interventions, and better outcomes (3-6). Sex differences are biology-linked differences between females and males caused by different sex chromosomes, sex-specific gene expression of autosomes, sex hormones, and their effects on organ systems (7). Gender differences arise from sociocultural processes such as the different behaviours of women and men, their exposure to environmental influences, impacts of nutrition, lifestyles or stress, and attitudes towards illness, treatment and prevention (7). Gender roles and gender identity are influenced by a complex interplay between genetic, endocrine, and social factors (8). Finally, sex or gender are not straightforward binary categories. Many femininities and masculinities exist and can influence other important sociodemographic variables (9).

Disease manifestation and outcomes differ between men and women. For example, twice as many women suffer from depression, and three times as many men commit suicide (5, 10, 11). Recent evidence supports a link between type 2 diabetes (T2D) and depression, and findings suggest that there are differences between men and women at the levels of predisposition, risk factors, clinical representation, disease outcome, comorbidity and treatment efficacy (7, 9). Gender described by psychosocial influences, rather than biological differences, can also affect individuals with T2D and depression (7, 12, 13). For example, women are at greater risk of suffering from insomnia and sleep deprivation, which are both correlated with obesity and depression (7, 14).

These findings have yet to be translated adequately into clinical practice (2). For example, a 2017 review suggested that only 35% of studies on Canadian practice guidelines, a cornerstone of knowledge translation, reported screening, diagnosis or management considerations specific to sex or gender, and only 25% used the terms “sex” and “gender” correctly (15).

Professional development (CPD) is another cornerstone of knowledge translation as it mobilizes professional and regulatory bodies as well as educational institutions to foster

1  
2  
3 changes in clinical practice (16, 17). We define CPD as all educational activities serving  
4 to maintain or increase the knowledge, skills, work performance, and relationships that a  
5 clinician needs to serve patients, the public or the profession (5, 18, 19). We argue that  
6 integrating sex and gender considerations in CPD, one of the most effective strategies for  
7 changing clinical practice, will help address the inequities between men and women. We  
8 aimed to assess the feasibility and impact of including sex and gender considerations in a  
9 CPD course on T2D and depression on health professionals' intention to include sex and  
10 gender considerations in patient care.  
11  
12  
13  
14  
15  
16

## 17 **METHODS**

### 18 **Study design and setting**

19  
20 We conducted a non-randomized mixed-methods study with a concurrent embedded  
21 design: (1) a two-arm non-randomized controlled trial with post-intervention measures  
22 only; and (2) semi-structured group discussions following the CPD course. We used the  
23 Theory of Planned Behavior for quantitative analysis, Theoretical Domains Framework  
24 (TDF) for qualitative analysis, and the COM-B model to triangulate findings. We  
25 followed the CONSORT extension for Pilot and Feasibility Trials Checklist to report  
26 results (20).  
27  
28  
29  
30  
31  
32  
33  
34

35 This project is one of six that were funded by the Canadian Institutes of Health Research  
36 to explore sex and gender issues in knowledge translation (21), gender transformative  
37 approaches to knowledge translation, and sex- and gender-based analysis (5, 21).  
38  
39  
40

41 A multidisciplinary team was created of 25 researchers: two sex and gender specialists,  
42 three patient-partners with experience with T2D and/or mental health issues (two males  
43 and one female), two physicians, one nurse, two CPD managers, one research assistant  
44 and two trainees. An executive committee of 12 team members (including all patient-  
45 partners) held monthly meetings addressing the main concerns in each research phase.  
46 They chose the clinical topic of the course based on needs expressed by CPD providers  
47 on the team. They then adapted an existing diabetes and depression CPD course to include  
48 sex and gender considerations and contacted CPD providers in three Canadian provinces  
49 to collaborate on implementing the courses.  
50  
51  
52  
53  
54  
55  
56  
57  
58  
59  
60

### **Patient involvement**

Three patient-partners, core members of the executive committee, contributed to governance (e.g., attending meetings and courses, making executive decisions) and intervention design. They contributed their experience to the CPD course, helped collect data and interpret results, coauthored this paper and advised us on plain language use for our presentations.

### **Participants and recruitment**

All health professionals working in the clinical settings where our CPD course was advertised, including hospitals and family medicine groups, or participating in the continuing medical education (CME) conference where the course was to be offered, were invited to participate. Our key CPD partners were physicians but we invited all health professionals to the courses. Eligible participants were invited by email and through the Internet registration platforms of CME conferences in three Canadian provinces (Quebec, Ontario, New-Brunswick). Participants stayed in their respective groups for the semi-structured group discussion that immediately followed the CPD course. Inclusion criteria were: practising health professionals available to participate in person for the whole course; and fluent in French (all our CPD courses were in French). Ethical approval was obtained from the Centre intégré universitaire de santé et de services sociaux de la Capitale-Nationale (CIUSSS-CN) Ethics Board (2017-2018-16 MP), the Hôpital Montfort Research ethics board (19-20-05-009), and the Vitalité Health Network research ethics board (CER-2019-18).

### **Intervention**

Informed by a needs assessment of physicians by our key CPD stakeholder, Médecins Francophone Canada, we chose patients with T2D and depression combined as the clinical topic. There is growing evidence of a link between T2D and depression and the influence of sex and gender in patients with this comorbidity (22, 23). The team adapted an existing T2D and depression CPD course to include evidence-based sex and gender considerations. The original course, a 1-hour classroom-based activity, describes links between TD2 and depression, reviews CANMAT 2016 Depression Guidelines and

1  
2  
3 reviews pharmacological and non-pharmacological treatment of T2D and depression. We  
4 added sex- and gender-specific content including: 1) definitions and differences between  
5 the concepts of sex and gender, 2) epidemiological data on the differences in incidence,  
6 prevalence, morbidity and mortality between men and women with T2D and depression,  
7 and 3) a video explaining sex biases associated with these two conditions. The adapted  
8 CPD course (intervention) kept the original duration (one hour) and medical content of  
9 the original course (comparator). Links between T2D and depression were explained  
10 together with sex and gender differences and reviews of pharmacological and non-  
11 pharmacological treatments were condensed. As per patient-partners' recommendations,  
12 we also held 30-minute semi-structured group discussions with both the intervention and  
13 control group immediately following the course. In the group discussion we presented a  
14 clinical case vignette on managing a patient with T2D and depression in which the health  
15 professional's behaviour exhibited various inconsistencies with best clinical practices.  
16 We asked participants to write down the main inconsistency and to categorize it within  
17 five categories determined by our team: 1) failure to mention positive factors for recovery,  
18 2) failure to engage the patient in their health-related decision, 3) sex and gender biases,  
19 4) failure to take into account notions of sex and gender, and 5) cannot be categorized.  
20 We prompted participants to discuss their perception of sex and gender considerations by  
21 linking them to the clinical vignette and to their clinical experience of integrating sex and  
22 gender considerations in general.  
23  
24  
25  
26  
27  
28  
29  
30  
31  
32  
33  
34  
35  
36  
37

38 Depending on the setting (hospitals, family medicine groups, CME conferences) we either  
39 (1) assigned the participants to the control or intervention group on their arrival to achieve  
40 a balanced number of participants in both groups or (2) the participants registered in one  
41 group or the other, both groups being blinded to the intervention and control group.  
42 Efforts were made to equally divide groups regarding number and sex of participants. At  
43 registration, participants were told that it was a research project that required their  
44 consent. Participants could attend the course and receive CME credits whether they chose  
45 to participate in the study or not. All CPD courses were delivered by the same two  
46 physicians (one male, assigned to the control group, and one female, assigned to the  
47 intervention group) in all the research settings. We planned to offer six courses (three  
48 intervention and three control), two in each province (control and intervention  
49  
50  
51  
52  
53  
54  
55  
56  
57

1  
2  
3 simultaneously). Each course was a 45-minute lecture on DT2 and depression followed  
4 by 15 minutes to fill in the CPP-Reaction questionnaire. An additional 30 minutes was  
5 planned for the semi-structured group discussion.  
6  
7

## 8 **Outcome Measures**

9  
10 We assessed three feasibility outcome measures: recruitment, retention and adherence: 1)  
11 recruitment of >90 course participants for six courses and study participation rate of  
12 >70% (24, 25), 2) retention of CPD organisations, collaborators and patient-partners  
13 throughout the project, 3) the holding of all planned CPD courses in all three provinces.  
14 Sample size was based on consultations with clinic managers and CPD providers and on  
15 practical considerations (e.g. average size of CPD courses, venues, the course being  
16 provided in French only).  
17  
18

19 We used CPD-Reaction (French version) to measure participants' behavioural intention  
20 to include sex and gender considerations in patient care. CPD-Reaction is a self-  
21 administered questionnaire (Cronbach  $\alpha$  0.79–0.89) (26, 27). Twelve items measure five  
22 constructs determined through a systematic review of theory-driven studies of behaviour  
23 change in health professionals: 1) behavioural intention, 2) beliefs about capabilities, 3)  
24 social influences, 4) beliefs about consequences, and 5) moral norm (24). The score for  
25 each construct is computed as the average of each item (Likert scale of 1 to 7), except for  
26 social influence, which is rated on a Likert scale of 1 to 5 (25). There is no global score.  
27 Finally, in group discussions, we identified barriers and facilitators to including sex and  
28 gender considerations in caring for patients with T2D and depression and mapped them  
29 onto the TDF. The TDF was developed through a consensus of experts who consolidated  
30 33 psychosocial theories of behaviour change to generate 14 domains (28).  
31  
32  
33  
34  
35  
36  
37  
38  
39  
40  
41  
42  
43  
44  
45

## 46 **Data collection**

47 Quantitative data were collected post-intervention with the CPD-Reaction questionnaire  
48 and sociodemographic questions (26). Semi-structured qualitative discussion took place  
49 in both intervention and control groups after the questionnaires were completed so as to  
50 not influence the quantitative results. In both intervention and control groups, discussions  
51 were recorded and transcribed.  
52  
53  
54  
55  
56  
57  
58  
59  
60

## Analysis

### Quantitative analysis

Categorical variables were described by reporting absolute (n) and relative (%) frequencies. Continuous variables were described by their measure of central tendency (mean and/or median) and dispersion (standard deviation and percentiles). Covariance analysis was used to compare the scores of the intervention and control groups. As the intention did not have a perfectly Gaussian distribution, we also compared intention scores using Wilcoxon's non-parametric analysis and used the Kruskal-Wallis test to compare medians. We used Spearman's rank test to assess the correlation between the intention scores and psychosocial factors (social influence, beliefs about capacity, moral norms, beliefs about consequences). We used general linear models to assess whether the intention score varied significantly from the control group to intervention group after adjusting for confounding factors. These factors were identified using the 10% change in the regression coefficient associated with the exposure variable (29, 30). However, to increase the appearance validity of the model, we constructed a separate model in which we forced age, sex and practice environment. SAS software (version 9.4) was used for all statistical analyses. The empirical significance threshold (P value) was set at 0.05 in bilateral analysis.

### Qualitative analysis

The discussion transcripts were imported into N'Vivo V.12 for analysis. Using the TDF as a guide, two researchers reviewed and agreed on codes and data were simultaneously coded using a thematic deductive approach (ADT, AGo) (31). Data were then refined into TDF domains. As the discussion occurred in French, all illustrative quotes were translated into English by a master's student (ADT) and reviewed by a scientific translator. We calculated the frequency of each barrier and facilitator by recording the number of times it was mentioned in the four group discussions (GDs 1 to 4).

### Triangulating quantitative and qualitative data

We triangulated quantitative and qualitative data to propose practical theory-driven recommendations for improving our CPD intervention (32). We compared the five



psychosocial determinants measured in the CPD-Reaction questionnaire to the domains of the TDF. We observed where quantitative and qualitative data converged, where they offered additional information on the same constructs, and where they diverged. We derived recommendations using the COM-B model of behaviour (33). COM-B proposes three criteria essential for a behaviour to occur: capacity, opportunity and motivation (34). The subcategories of these criteria can be linked to the TDF domains and their associated barriers or facilitators (Supplementary Table 2). The COM-B also proposes nine intervention functions assigned to TDF domains that can prompt behaviour change: education, persuasion, incentivisation, coercion, training, restriction, environmental restructuring, modelling and enablement (33, 35, 36). Recommendations were made by identifying which of these intervention functions matched our results and then selecting relevant function-associated behaviour change techniques (33).

## RESULTS

### Recruitment and participant characteristics

We offered the 12 CPD courses (i.e. six intervention/control pairs) in each of three Canadian provinces: Quebec, Ontario and New Brunswick. Four pairs of courses were held in Quebec (two in Montreal, October 10<sup>th</sup> 2018 and October 30<sup>th</sup> 2019, and two in Quebec City, October 17<sup>th</sup> 2019 and January 29<sup>th</sup> 2019 ), one in Ontario (Ottawa, November 8<sup>th</sup> 2019) and one in New-Brunswick (Moncton, October 4<sup>th</sup> 2019).

**Figure 1** illustrates the flow of participants. The participation rate (ratio of users who participated in the study to those who took the training) was 71% (127/178). Forty-nine of 92 questionnaires were analysed from the intervention groups and 78 of 86 from the control groups. Most participants were under 44 years old (n=80, 63%), female (n=101, 79.5%), practiced in French (n=86, 67.7%), in Quebec (n=85, 66.9%) and in an urban setting (n=100, 78.8%) (Table 1).

**Table 1:** Sociodemographic characteristics of the participants in intervention and control groups

|  | TOTAL | Intervention Group | Control Group |
|--|-------|--------------------|---------------|
|--|-------|--------------------|---------------|



|                              |            |           |           |
|------------------------------|------------|-----------|-----------|
| <b>No. Of Participants</b>   | 127        | 49        | 78        |
| <b>Age (years)*</b>          |            |           |           |
| <44                          | 80 (63.0)  | 28 (57.1) | 52 (66.7) |
| ≥ 45                         | 42 (33.1)  | 19 (38.8) | 23 (29.5) |
| Missing data                 | 5 (3.9)    | 2 (4.1)   | 3 (3.8)   |
| <b>Sex*</b>                  |            |           |           |
| Female                       | 101 (79.5) | 40 (81.6) | 61 (78.2) |
| Male                         | 19 (15.0)  | 7 (14.3)  | 12 (15.4) |
| Missing data                 | 7 (5.5)    | 2 (4.1)   | 5 (6.4)   |
| <b>Language of practice*</b> |            |           |           |
| French                       | 86 (67.7)  | 32 (65.2) | 54 (69.2) |
| Other                        | 36 (28.3)  | 15 (30.6) | 21 (26.9) |
| Missing data                 | 5 (4.0)    | 2 (4.1)   | 3 (3.9)   |
| <b>Province of practice</b>  |            |           |           |
| Quebec                       | 85 (66.9)  | 31 (63.2) | 54 (69.3) |
| Ontario                      | 18 (14.2)  | 9 (18.4)  | 9 (11.5)  |
| New Brunswick                | 16 (12.6)  | 7 (14.3)  | 9 (11.5)  |
| Missing data                 | 8 (6.3)    | 2 (4.1)   | 6 (7.7)   |
| <b>Practice environment*</b> |            |           |           |
| Urban                        | 100 (78.8) | 39 (79.6) | 61 (78.2) |
| Rural                        | 14 (11.0)  | 4 (8.2)   | 10 (12.8) |

|              |           |          |         |
|--------------|-----------|----------|---------|
| Missing data | 13 (10.2) | 6 (12.2) | 7 (9.0) |
|--------------|-----------|----------|---------|

---

\*n(%);

## Quantitative results

### *Feasibility*

We recruited a total of 127 participants, a 41% increase from our target of 90 participants. Collaborators and executive committee members remained involved throughout the project. We held monthly executive committee meetings as planned. Our CPD trainings were held in the three provinces as planned. We gave 12 courses instead of the six initially planned, as more settings showed interest.

### *Behavioural Intention*

**Table 2** shows the scores of each psychosocial determinant in the CPD-Reaction questionnaire for both intervention and control groups. Mean difference between intervention and control scores for the four psychosocial determinants of behaviour change influencing intention were: MD=0.16 for social influence (95% CI: -0.26, 0.58), MD=0.63 for belief about capabilities (95% CI: 0.21, 1.06), MD=0.25 for moral norm (95% CI: -0.21, 0.72) and MD=0.22 for belief about consequences (95% CI: -0.23, 0.67). The mean intention score for including sex and gender considerations in patient care was higher in the intervention than in the control group, i.e. 5.65 ( $\pm$  0.19) versus 5.19 ( $\pm$ 0.15), on a scale from 1 (low) to 7 (high). The mean difference between the two groups was -0.47 (95% CI: -0.95, 0.01), with a p-value of 0.06 (**Supplementary table 1**). No statistically significant differences were observed for the remaining four psychosocial determinants. Bivariate analysis showed that the higher median for intention was significantly associated with age over 45 (p=0.03) and a rural practice environment (p=0.02) (**Supplementary table 1**). After adjusting for age, sex and practice environment, the mean difference in intention between the two groups was statistically significant: -0.57 (95% CI: -1.09, -0.05), with a p-value of 0.03 (**Table 3**).

**Table 2:** CPD-Reaction questionnaire mean scores

|                                                          | <b>Total</b>         | <b>Intervention</b>  | <b>Control</b>       | <b>Difference<br/>(95% CI)</b> |
|----------------------------------------------------------|----------------------|----------------------|----------------------|--------------------------------|
| <b>No. of participants</b>                               | 127                  | 49                   | 78                   | -                              |
| <b>Psychosocial determinants – score range (1 to 7)*</b> |                      |                      |                      |                                |
| Social influence                                         | 4.62 (4.42;<br>4.83) | 4.72 (4.44;<br>5.00) | 4.56 (4.27;<br>4.85) | 0.16 (-0.26;<br>0.58)          |
| Beliefs about capabilities                               | 5.1 (4.90;<br>5.33)  | 5.50 (5.27;<br>5.74) | 4.87 (4.56;<br>5.17) | 0.63 (0.21;<br>1.06)           |
| Moral norm                                               | 5.90 (5.69;<br>6.13) | 6.06 (5.80;<br>6.32) | 5.81 (5.48;<br>6.14) | 0.25 (-0.21;<br>0.72)          |
| Beliefs about consequences                               | 5.68 (5.46;<br>5.90) | 5.82 (5.52;<br>6.11) | 5.60 (5.28;<br>5.91) | 0.22 (-0.23;<br>0.67)          |
| <b>Intention*</b>                                        | 5.37 (5.13;<br>5.60) | 5.65 (5.36;<br>5.95) | 5.19 (4.85;<br>5.52) | 0.47 (-0.01;<br>0.95)          |

\*Mean (95% CI) ;

**Table 3:** Mean difference of the intention score between intervention and control groups

|              | <b>Model 1*</b>       |                | <b>Model 2†</b>            |                | <b>Model 3‡</b>            |                |
|--------------|-----------------------|----------------|----------------------------|----------------|----------------------------|----------------|
|              | <b>β (95% CI)</b>     | <b>P Value</b> | <b>β (95% CI)</b>          | <b>P Value</b> | <b>β (95% IC)</b>          | <b>P Value</b> |
| Control      | Reference             |                | Reference                  |                | Reference                  |                |
| Intervention | -0.47<br>(-0.95;0.01) | <b>0.057</b>   | -0.61<br>(-1.10;-<br>0.12) | <b>0.015</b>   | -0.57<br>(-1.09;-<br>0.05) | <b>0.031</b>   |

95% CI, confidence interval at 95%;

\*Non-adjusted;

†Adjusted for age and sex;

‡Adjusted for age, sex and environment of practice.

### Qualitative findings

Due to time constraints imposed by CME settings, we held the group discussions in two out of the six settings, Montreal, October 30<sup>th</sup> 2019 and Ottawa, November 8<sup>th</sup> 2019. Thus four semi-structured group discussions (GD1, GD2, GD3, GD4) were conducted and 67 health professionals participated, reporting a variety of barriers and facilitators (**Table 4**).

**Table 4:** Mapping facilitators and barriers to the Theoretical Domains Framework (TDF) with illustrative quotes and frequencies

| TDF DOMAIN                        | FACILITATOR/ BARRIER                                                                                   | ILLUSTRATIVE QUOTES*                                                                                                                                                                                                                                                                                                                                                                  | FREQUENCIES** (N=4 groups) |
|-----------------------------------|--------------------------------------------------------------------------------------------------------|---------------------------------------------------------------------------------------------------------------------------------------------------------------------------------------------------------------------------------------------------------------------------------------------------------------------------------------------------------------------------------------|----------------------------|
| <b>Skills</b>                     | The health professional acknowledges different treatment methods by sex (Facilitator)                  | “Dominique, is that a man or a woman? ... Because they are probably not treated the same” (GD4)                                                                                                                                                                                                                                                                                       | 4                          |
|                                   | The health professional acknowledges different clinical representation by sex (Facilitator)            | “...I work as a nurse in cardiac and pulmonary rehabilitation, and ... it is a fact, that women come less [to rehabilitation programs] in general than men. Women often will quit [rehabilitation] or they won't come because they're taking care of everyone. But something happens [illness] and then they don't have time to take care of themselves, because it's too much” (GD3) | 1                          |
|                                   | The health professional assumed the sex of the patient when analyzing a clinical vignette (Barrier)    | “I assumed that it was a guy” (GD3) / “I presumed that it was a girl” (GD4)                                                                                                                                                                                                                                                                                                           | 3                          |
| <b>Beliefs about Capabilities</b> | The health professional feels he/she can accurately observe the phenotype of the patient (Facilitator) | “At the first contact we have with a patient ... we see the phenotype there without talking about gender, it's one of the things that jumps out at you when you're taking notes.” (GD3)                                                                                                                                                                                               | 3                          |
| <b>Social influences</b>          | The health professionals assume the patient's sex based on his/her societal role (Barrier)             | “I heard ‘civil servant’, I don't know, in my head I was like ‘civil servant’, so it's a man.” (GD4)                                                                                                                                                                                                                                                                                  | 3                          |

|    |                      |                          |                                                             |   |
|----|----------------------|--------------------------|-------------------------------------------------------------|---|
| 1  |                      |                          |                                                             |   |
| 2  |                      |                          |                                                             |   |
| 3  | <b>Knowledge</b>     | The health               | “Yes, that’s it actually, the biological aspect             | 2 |
| 4  |                      | professional knows       | you certainly take into account in the study,               |   |
| 5  |                      | the differences          | but we are talking about [social] the                       |   |
| 6  |                      | between sex and          | categories of sex and gender... And                         |   |
| 7  |                      | gender in scientific     | menopause, and on the other hand [there’s]                  |   |
| 8  |                      | literature (Facilitator) | also andropause” (GD2)                                      |   |
| 9  |                      |                          |                                                             | 2 |
| 10 |                      | The health               | “Well, I don’t know why we didn’t note it                   |   |
| 11 |                      | professional did not     | [the sex of the patient], I don’t have the                  |   |
| 12 |                      | ask the sex of the       | answer to that. But ... when we talk about the              |   |
| 13 |                      | patient when             | clinical context it is systemically noted in the            |   |
| 14 |                      | analyzing a clinical     | first ... sentence, in the first two words [of              |   |
| 15 |                      | vignette (Barrier)       | notes documenting a consultation]. It’s hard                |   |
| 16 |                      |                          | to say that we ignore it [sex of the patient].              |   |
| 17 |                      |                          | We didn’t notice it here, but in clinical                   |   |
| 18 |                      |                          | practice, have you ever met a patient without               | 1 |
| 19 |                      |                          | identifying their gender?” (GD3)                            |   |
| 20 |                      |                          |                                                             |   |
| 21 |                      |                          | “...but in the seminar, there was no emphasis               |   |
| 22 |                      |                          | on that, so it didn’t jump out at us,” (GD3)                |   |
| 23 |                      | The health               |                                                             |   |
| 24 |                      | professional is not      |                                                             |   |
| 25 |                      | aware of the concepts    |                                                             |   |
| 26 |                      | of sex and gender        |                                                             |   |
| 27 |                      | when analyzing a         |                                                             |   |
| 28 |                      | clinical vignette        |                                                             |   |
| 29 |                      | (Barrier)                |                                                             |   |
| 30 | <b>Beliefs about</b> | The health               | “I would say that I didn’t see the need to know             | 2 |
| 31 | <b>Consequences</b>  | professional             | if it was a man or a woman...I never asked                  |   |
| 32 |                      | mentions that he/she     | myself the question...” (GD1)                               |   |
| 33 |                      | would not change         |                                                             |   |
| 34 |                      | her/his therapeutic      |                                                             |   |
| 35 |                      | approach according       |                                                             |   |
| 36 |                      | to the patient’s sex     |                                                             |   |
| 37 |                      | (Barrier)                |                                                             |   |
| 38 |                      |                          |                                                             |   |
| 39 |                      |                          |                                                             |   |
| 40 | <b>Environment</b>   | The patient’s sex is     | “... in the clinical context it’s [the sex of the           | 2 |
| 41 | <b>al Context</b>    | routinely recorded in    | patient] systematically noted in the first lines            |   |
| 42 | <b>and</b>           | medical notes            | in every consultation. In the first sentence, in            |   |
| 43 | <b>Resources</b>     | (Facilitator)            | the first two words. It’s hard to say that we               |   |
| 44 |                      |                          | ignore it.” (GD3)                                           |   |
| 45 |                      |                          |                                                             |   |
| 46 |                      | The androcentric         | “In French everything is masculine until you                | 1 |
| 47 |                      | nature of the French     | know, like in the room here [mostly women                   |   |
| 48 |                      | language (the use of     | participants] we’ll say like “ils ont fait ça” [ <i>ils</i> |   |
| 49 |                      | masculine generic        | is a masculine pronoun] because you are the                 |   |
| 50 |                      | language to refer to     | only men, but...” [generalizing to the                      |   |
| 51 |                      | men and women, as        | masculine pronoun] (GD3) / “The language                    |   |
| 52 |                      | well as other gender     | doesn’t help ... [to differentiate between men              |   |
| 53 |                      | representation)          | and women].” (GD3)                                          |   |
| 54 |                      | (Barrier)                |                                                             |   |
| 55 |                      |                          |                                                             |   |
| 56 |                      |                          |                                                             |   |
| 57 |                      |                          |                                                             |   |
| 58 |                      |                          |                                                             |   |
| 59 |                      |                          |                                                             |   |
| 60 |                      |                          |                                                             |   |

|                                                 |                                                                                                                                                     |                                                                                                                                                                                                                                                                         |   |
|-------------------------------------------------|-----------------------------------------------------------------------------------------------------------------------------------------------------|-------------------------------------------------------------------------------------------------------------------------------------------------------------------------------------------------------------------------------------------------------------------------|---|
|                                                 | The healthcare professional perceives that the language used by physicians towards a patient may be different according to sex and gender (Barrier) | “Well it’s about when you say ‘our diabetes’ and ‘your depression’, if it had been a woman would we have said the same thing?... ‘your depression’ ‘our diabetes’...” (GD2) [referring to the bias in the language to describe ‘your’ depression versus ‘our’ diabetes] | 1 |
| <b>Social/Professional Role and Identity</b>    | The health professional reflects positively on his/her relationship with the patient (Facilitator)                                                  | “I work in an exclusively white environment, and I am the only black person, and I have no problem whether [the patient] is male, female or a child” (GD3)                                                                                                              | 1 |
| <b>Intentions</b>                               | The health professional has the intention to change his/her therapeutic approach by considering the differences of sex (Facilitator)                | “With the information that I have here [clinical description of vignette], if I had ‘menopausal woman’, then I think I would have researched more, but with what I had here, I didn’t [see the need].” (GD4)                                                            | 1 |
|                                                 | The health professional does not have the intention to change his/her therapeutic approach by considering the differences of sex (Barrier)          | “With what I have here [descriptive information of the clinical vignette], I am not sure to what extent I would have changed my approach” (GD4)                                                                                                                         | 1 |
| <b>Goals</b>                                    | The health professional does not perceive the integration of the concepts of sex and gender in clinical practice as a priority (Barrier)            | “It wasn’t important ... the most important, [but] that doesn’t mean that [the lack of sex and gender consideration in the clinical vignette] wasn’t perceived” (GD4)                                                                                                   | 1 |
| <b>Memory, Attention and Decision Processes</b> | The health professional does not consider that sex and gender are necessary parts of the decision-making process (Barrier)                          | “If it is not obvious, we are not inclined to do it... [take into consideration the sex and gender of the patient]” (GD2)                                                                                                                                               | 1 |

\*Free translation from French

\*\*The number of times that the barrier/facilitator appeared in the transcript

### ***Barriers mapped to the TDF domains***

1  
2  
3 Ten barriers mapped to nine of the 14 TDF domains. Skills and social influence were the  
4 most frequent domains (n=3) (**Table 4**). We mapped barriers to skills when participants  
5 assumed the sex of the patient in the vignette without asking. Barriers were mapped to  
6 social influence when participants assumed the sex of the patient based on a social trait,  
7 such as employment. We mapped barriers to knowledge when participants did not show  
8 awareness that the patient's sex was relevant, i.e. simply did not ask about it. We also  
9 mapped barriers to knowledge when participants reported they did not take sex and gender  
10 into account because the CPD training did not suggest it was necessary. When participants  
11 reported not needing to know the patient's sex because this information would not have  
12 changed their intervention, we mapped the barrier to beliefs about consequences. Other  
13 barriers mapped to six other domains. Finally, when asked why they didn't identify lack of  
14 sex and gender as the main inconsistency in the clinical vignette, most participants  
15 responded that it was less important than other inconsistencies in the clinical practice of  
16 the fictitious physician.  
17  
18  
19  
20  
21  
22  
23  
24  
25  
26

### 27 ***Facilitators mapped to the TDF domains***

28  
29  
30 Seven facilitators mapped onto six of the 14 TDF domains (**Table 4**). When participants  
31 asked the sex of the patient before analysing the clinical vignette, we mapped it onto skills  
32 (n=4), as it demonstrated they did not assume the sex or gender of the patient and awareness  
33 that they should consider sex and gender before clinical analysis. Participants documented  
34 some differences between men and women patients in their clinical practice, demonstrating  
35 ability acquired through practice to include sex and gender considerations. Participants also  
36 reported they did not ask the sex of the patient in the clinical vignette as they automatically  
37 observe a patient's sex in practice, so didn't feel the need to mention it in this context. This  
38 facilitator was mapped to the domain beliefs about capabilities (n=3). Some participants  
39 reported that they routinely observe and record a patient's sex when taking notes. This  
40 facilitator was mapped to the domain environmental context and resources, since it this is  
41 an institutional practice reflecting an organisational clinical culture, and could foster  
42 further awareness and consideration of sex and gender.  
43  
44  
45  
46  
47  
48  
49  
50  
51  
52

53 Other facilitators were mapped to knowledge, intention, and social/professional role and  
54 identity (**Table 4**).  
55  
56  
57

## Triangulation

CPD-Reaction psychosocial variables matched barriers that mapped onto to the TDF domains beliefs about consequences, social influence and intentions. CPD-Reaction psychosocial variables also matched facilitators that mapped onto to the TDF domains beliefs about capabilities and intentions. We identified six additional psychosocial variables from the TDF: knowledge, skills, goal, memory, attention and decision processes, environmental context and resources, social/professional role and identity. Results of triangulation were summarised with consequent recommendations (**Supplementary table 2**). Recommendations for improving the CPD training were based on behaviour change techniques associated with the following functions: modelling, training, environmental restructuring, enablement, education and goal settings (**Supplementary table 2**). Training (n=5) and education (n=4) were the most frequent functions used in the recommendations.

## DISCUSSION

We assessed the feasibility and impact of including sex and gender considerations in a CPD course on T2D and depression care, on health professionals' intention to include sex and gender considerations in patient care. Recruited CPD organisations, collaborators and patient-partners stayed engaged throughout the study. All planned activities occurred and 71% of targeted health professionals participated. The intention to include sex and gender considerations in patient care was higher in the intervention group, and statistically significant when controlling for age, sex, and practice sites. Barriers were mostly related to skills and social influence and facilitators to skills and beliefs about capabilities. We triangulated results and produced for improving the CPD course. The following observations could enable CPD organizations to systematically improve CPD by integrating sex and gender considerations into their existing material.

First, all our predetermined feasibility criteria were met. In fact, due to increased interest in the topic, we recruited more participants and gave more CPD activities than planned. Recruitment may also have improved because we involved stakeholders early on in the research process, including in applying for the grant. Early engagement of stakeholders has been associated elsewhere with more successful recruitment (37). Therefore, elements that should be considered when designing similar CPD activities include, but are not limited to:



1  
2  
3 1) successful collaboration and co-creation with CPD organizations early on including  
4 during grant writing, 2) offering CME accreditation for the CPD activities allowing  
5 participants to earn CME credits, 3) the duration for the training, and 4) the evidence-based  
6 relevant to the clinical topic (38).  
7  
8  
9

10  
11 Second, the CPD course that included sex and gender considerations increased health  
12 professionals' intention to include sex and gender considerations in patients' care. This  
13 may suggest a significant knowledge gap among participants. Studies show that health  
14 professionals lack knowledge of sex and gender differences in disease manifestation and  
15 outcomes and fail to recognize the gender constraints that their patients face (39-42). For  
16 example, in a cross-sectional survey of physicians (71% male), 55% said that the medical  
17 curriculum did not adequately prepare them for dealing with sexual health problems,  
18 particularly those of female patients (39). In another study, only 49% of primary care  
19 physicians (n=200, 65% male) and 59% of cardiologists (n=100, 85% male) reported that  
20 their training prepared them to assess female patients' cardiovascular risk (41). Our study  
21 represents a promising avenue for rectifying these gaps. Furthermore, the effectiveness of  
22 our CPD course was greater among older participants from rural sites. Their age and  
23 geographical isolation perhaps reduced their exposure to sex and gender issues, which have  
24 only been included in medical curricula since they qualified (42). They may also have less  
25 access to CPD training due to isolation, poor technological resources, low financial support  
26 (43, 44) and geographical variations in medical practice styles (45, 46). Future studies  
27 could further investigate the perceptions of health professionals in rural settings  
28 considering their age and sex. They could also document if patients experience  
29 geographical differences in care regarding sex and gender. Training could target older and  
30 rural health professionals, who seemed more open to modifying their clinical practice.  
31  
32  
33  
34  
35  
36  
37  
38  
39  
40  
41  
42  
43  
44  
45

46 Third, several barriers and facilitators to considering sex and gender in patient care were  
47 identified. These semi-structured group discussions using a clinical vignette may be  
48 considered as reinforcing activities which have been shown to contribute to clinical behavior  
49 change (47). Whilst measuring health professionals' behavior to analyze its relationship  
50 with intention is not easily attainable but identifying barriers and facilitators to behaviour  
51 change is a necessary first step (47). Beliefs about capabilities as a facilitator showed the  
52  
53  
54  
55  
56  
57  
58  
59  
60

1  
2  
3 strongest mean difference between the intervention and control groups. Adding a practical  
4 component to the CPD course may strengthen beliefs about capabilities. However, our  
5 qualitative analysis showed that participants did not consider integrating sex and gender  
6 into clinical practice as a priority, with social influences emerging as an important barrier.  
7  
8 The social influence score as measured by CPD-Reaction also showed the lowest impact  
9  
10 (MD=0.16), suggesting that the training did not address this factor (Table 2). A CPD course  
11  
12 could offer a reflective segment on how social influence could be affecting their clinical  
13  
14 practice (46, 48). Furthermore, belief about consequences had one of the lowest MD (0.22)  
15  
16 of the five psychosocial determinants, and one associated barrier (n=2 participants), and  
17  
18 could be remedied by focusing more on the consequences of not integrating sex and gender  
19  
20 into clinical practice (40). In spite of the low priority given to sex and gender by our  
21  
22 participants, qualitative analysis demonstrated that opportunities already exist for  
23  
24 integrating these considerations into practise, such as the routine documenting of the  
25  
26 patient's sex. CPD strategies could make more of these opportunities (49). CPD courses  
27  
28 could also incorporate sex- and gender-based analysis tools (50).

29  
30 Our study has a few limitations. As we used a single post-intervention measure, we cannot  
31  
32 attribute the difference between the two groups solely to the intervention. However, our  
33  
34 analysis suggests that those who completed the intervention increased their intention, as  
35  
36 well as increasing all four psychosocial predictors, suggesting an association with the  
37  
38 intervention. Second, although the human resources for both groups were the same (trainer,  
39  
40 research-assistant and patient-partners), the control group had an extra team member  
41  
42 resulting in unequal numbers of participants who signed consent in each group. The  
43  
44 presence of this extra member could also explain the difference in the number of  
45  
46 questionnaires collected in the two groups. Lastly, our discussion groups attracted many  
47  
48 participants, limiting both participants' opportunity to speak and the depth of the  
49  
50 discussion. Our mixed-methods approach is a strength of this study and our findings  
51  
52 support the feasibility of a randomized trial informed by identified barriers and facilitators.

## 53 **CONCLUSION**

54 A CPD course with sex and gender considerations is feasible, well received by health  
55  
56 professionals and had a favourable impact on health professionals' intention to include

1  
2  
3 sex and gender considerations in caring for individuals with T2D and depression. The  
4 impact was higher on older participants practising in rural areas. However, several  
5 barriers and facilitators to providing sex- and gender-adapted diabetes and depression  
6 care will need to be addressed. Our findings will inform future CPD initiatives that  
7 address this and other inequities in health care pertaining to sex and gender.  
8  
9  
10  
11  
12  
13

### 14 **Acknowledgements**

15  
16 We thank the members of the mATrICES-F Group for their involvement in this project.  
17 We also thank Louisa Blair for editing this manuscript.  
18  
19

### 20 **Collaborators mATrICES-F Group:**

21 Alèxe Deom Tardif, Université Laval

22 Amédé Gogovor, Université Laval

23 André Bilodeau, Hôpital Montfort

24 André Bussièrès, McGill University

25 André Gaudreau, Patient-partner

26 Audrey Ferron Parayre, University of Ottawa

27 Caroline Jose, Université de Moncton

28 Danièle Remy-Lamarche, Patient-partner

29 Dawn Stacey, University of Ottawa

30 Denis Audet, University Family Medicine Group Saint-François-d'Assise

31 Denis Prud'homme, Hôpital Montfort

32 France Légaré, Université Laval

33 Francine Borduas, Médecins francophones du Canada

34 Gerard Ngueta, VITAM – Centre de recherche en santé durable  
35  
36  
37  
38  
39  
40  
41  
42  
43  
44  
45  
46  
47  
48  
49  
50  
51  
52  
53  
54  
55  
56  
57  
58  
59  
60

1  
2  
3 Geneviève Roch, Université Laval  
4

5 Hélène Lee-Gosselin, Université Laval  
6

7  
8 Isabelle Auclair, Université Laval  
9

10 Laurie Laplanche, Université Laval  
11

12 Luc Vigneault, Patient-partner  
13

14  
15 Maman Joyce Dogba, Université Laval  
16

17 Marie-Claude Tremblay, Université Laval  
18

19 Marie-Pierre Gagnon, Université Laval  
20

21  
22 Nicole Parent, Médecins francophones du Canada  
23

24 Sabrina Guay-Bélanger, VITAM – Centre de recherche en santé durable  
25

26  
27 Sophie Desroches, Université Laval  
28

29 Valérie Borde, Centre DECLIC  
30

### 31 32 **Contributors**

33  
34 ADT, AGo, SGB and FL conceived, designed and drafted the manuscript. NP, DA, AGa,  
35 DRL, LV and GN critically revised the interpretation of data. All authors and members of  
36 the mATrICES-F Group read, provided feedback and approved the final manuscript.  
37  
38

### 39 40 **Funding**

41  
42 This work was supported by the Canadian Institutes of Health Research, grant number  
43 201702IGK-384530-IGK-CFBA-19158. AGo is funded by a CIHR Patient-Oriented  
44 Research fellowship. FL holds a Tier 1 Canada Research Chair in Shared Decision Making  
45 and Knowledge Translation.  
46  
47  
48

### 49 50 **Disclaimer**

51  
52 The findings and views are those of the authors.  
53

### 54 55 **Competing interests**

None declared.

### **Patient consent for publication**

Not applicable.

### **Ethics approval**

Centre intégré universitaire de santé et de services sociaux de la Capitale-Nationale (CIUSSS-CN) Ethics Board (2017-2018-16 MP), the Hôpital Montfort Research ethics board (19-20-05-009), Vitalité health network research ethics board (CER-2019-18).

### **Provenance and peer review**

Not commissioned; externally peer reviewed.

### **Patient consent for publication**

Not required.

### **Data sharing statement**

Data are available upon reasonable request.

### **References**

1. Clayton JA, Tannenbaum C. Reporting Sex, Gender, or Both in Clinical Research? JAMA. 2016;316(18):1863.
2. Institut de recherche en santé du Canada. Comment intégrer le sexe et le genre à la recherche 2019 [Available from: <http://cihr-irsc.gc.ca/f/50836.html>].
3. Johnson JL, Greaves L, Repta R. Better science with sex and gender: Facilitating the use of a sex and gender-based analysis in health research. International Journal for Equity in Health. 2009;8(1):14.
4. Oliffe J, Greaves L. Designing and Conducting Gender, Sex, and Health Research. Thousand Oaks, California 2012. Available from: <http://sk.sagepub.com/books/designing-and-conducting-gender-sex-and-health-research>.
5. Légaré F, Lee-Gosselin H, Borduas F, Monette C, Bilodeau A, Tanguay D, et al. Approaches to considering sex and gender in continuous professional development for health and social care professionals: An emerging paradigm. Medical Teacher. 2018;40(9):875-9.
6. Tannenbaum C, Ellis RP, Eyssel F, Zou J, Schiebinger L. Sex and gender analysis improves science and engineering. Nature. 2019;575(7781):137-46.

- 1  
2  
3 7. Kautzky-Willer A, Harreiter J, Pacini G. Sex and gender differences in risk,  
4 pathophysiology and complications of type 2 diabetes mellitus. *Endocrine reviews*.  
5 2016;37(3):278-316.
- 6  
7 8. Geary N. Counterpoint: physiologists should not distinguish “sex” and “gender”.  
8 *American Journal of Physiology-Regulatory, Integrative and Comparative Physiology*.  
9 2010;298(6):R1702-R4.
- 10  
11 9. Demmer RT, Gelb S, Suglia SF, Keyes KM, Aiello AE, Colombo PC, et al. Sex  
12 Differences in the Association Between Depression, Anxiety, and Type 2 Diabetes  
13 Mellitus. 2015;77(4):467-77.
- 14  
15 10. Kuehner C. Why is depression more common among women than among men?  
16 *Lancet Psychiatry*. 2017;4(2):146-58.
- 17  
18 11. Turecki G, Brent DA. Suicide and suicidal behaviour. *The Lancet*.  
19 2016;387(10024):1227-39.
- 20  
21 12. Ryba MM, Hopko DR. Gender Differences in Depression: Assessing Mediation  
22 Effects of Overt Behaviors and Environmental Reward through Daily Diary Monitoring.  
23 *Depression Research and Treatment*. 2012;2012:865679.
- 24  
25 13. Schmid SM, Hallschmid M, Schultes B. The metabolic burden of sleep loss.  
26 *Lancet Diabetes Endocrinol*. 2015;3(1):52-62.
- 27  
28 14. Li L, Wu C, Gan Y, Qu X, Lu Z. Insomnia and the risk of depression: a meta-  
29 analysis of prospective cohort studies. *BMC Psychiatry*. 2016;16(1):375.
- 30  
31 15. Tannenbaum C, Clow B, Haworth-Brockman M, Voss P. Sex and gender  
32 considerations in Canadian clinical practice guidelines: a systematic review. *CMAJ*  
33 *Open*. 2017;5(1):E66-E73.
- 34  
35 16. Ferlie EB, Shortell SM. Improving the quality of health care in the United  
36 Kingdom and the United States: a framework for change. *Milbank Q*. 2001;79(2):281-  
37 315.
- 38  
39 17. Davis D, Evans M, Jadad A, Perrier L, Rath D, Ryan D, et al. The case for  
40 knowledge translation: shortening the journey from evidence to effect. *Bmj*.  
41 2003;327(7405):33-5.
- 42  
43 18. Davis D, Galbraith R. Continuing Medical Education Effect on Practice  
44 Performance. *Chest*. 2009;135(3):42S-8S.
- 45  
46 19. Institute of Medicine. Redesigning Continuing Education in the Health  
47 Professions. Washington, DC: The National Academies Press; 2010. 296 p.
- 48  
49 20. Eldridge SM, Chan CL, Campbell MJ, Bond CM, Hopewell S, Thabane L, et al.  
50 CONSORT 2010 statement: extension to randomised pilot and feasibility trials. *BMJ*.  
51 2016;355:i5239.
- 52  
53 21. Gogovor A MT, Etherington N, Colantonio A, Légaré F, on behalf of the GIKT  
54 Group. Sex and gender analysis in knowledge translation interventions: challenges and  
55 solutions. *Health Research Policy and Systems*. 2020;18(1):108.
- 56  
57 22. Atlantis E, Fahey P, Foster J. Collaborative care for comorbid depression and  
58 diabetes: a systematic review and meta-analysis. *BMJ Open*. 2014;4(4):e004706.
- 59  
60 23. Holt RI, de Groot M, Golden SH. Diabetes and depression. *Curr Diab Rep*.  
2014;14(6):491.
24. Légaré F, Freitas A, Turcotte S, Borduas F, Jacques A, Luconi F, et al.  
Responsiveness of a simple tool for assessing change in behavioral intention after  
continuing professional development activities. *PLOS ONE*. 2017;12(5):e0176678.

- 1
  - 2
  - 3
  - 4
  - 5
  - 6
  - 7
  - 8
  - 9
  - 10
  - 11
  - 12
  - 13
  - 14
  - 15
  - 16
  - 17
  - 18
  - 19
  - 20
  - 21
  - 22
  - 23
  - 24
  - 25
  - 26
  - 27
  - 28
  - 29
  - 30
  - 31
  - 32
  - 33
  - 34
  - 35
  - 36
  - 37
  - 38
  - 39
  - 40
  - 41
  - 42
  - 43
  - 44
  - 45
  - 46
  - 47
  - 48
  - 49
  - 50
  - 51
  - 52
  - 53
  - 54
  - 55
  - 56
  - 57
  - 58
  - 59
  - 60
25. Légaré F, Borduas F, Freitas A, Turcotte S. User Manual – The Continuing Professional Development (CPD) Reaction Questionnaire. 2015.
26. Légaré F, Borduas F, Freitas A, Jacques A, Godin G, Luconi F, et al. Development of a Simple 12-Item Theory-Based Instrument to Assess the Impact of Continuing Professional Development on Clinical Behavioral Intentions. *PLoS ONE*. 2014;9(3):e91013.
27. Godin G, Bélanger-Gravel A, Eccles M, Grimshaw J. Healthcare professionals' intentions and behaviours: A systematic review of studies based on social cognitive theories. *Implementation Science*. 2008;3(1):36.
28. Michie S. Making psychological theory useful for implementing evidence based practice: a consensus approach. *Quality and Safety in Health Care*. 2005;14(1):26-33.
29. Mickey R M GS. The Impact of Confounder Selection Criteria on Effect Estimation *American Journal of Epidemiology*. 1989;129(1):125-37.
30. Budtz-Jørgensen E, Keiding N, Grandjean P, Weihe P. Confounder selection in environmental epidemiology: assessment of health effects of prenatal mercury exposure. *Ann Epidemiol*. 2007;17(1):27-35.
31. Atkins L, Francis J, Islam R, O'Connor D, Patey A, Ivers N, et al. A guide to using the Theoretical Domains Framework of behaviour change to investigate implementation problems. *Implement Sci*. 2017;12(1):77.
32. O'Cathain A, Murphy E, Nicholl J. Three techniques for integrating data in mixed methods studies. *Bmj*. 2010;341:c4587.
33. Michie S, Atkins L, R. W. *The behaviour change wheel : a guide to designing Interventions*. Great Britain: Silverback Publishing; 2014.
34. West R, Michie S. A brief introduction to the COM-B Model of behaviour and the PRIME Theory of motivation. *Qeios*. 2020.
35. Michie S, van Stralen MM, West R. The behaviour change wheel: A new method for characterising and designing behaviour change interventions. *Implementation Science*. 2011;6(1):42.
36. Agbadjé TT, Menear M, Dugas M, Gagnon M-P, Rahimi SA, Robitaille H, et al. Pregnant women's views on how to promote the use of a decision aid for Down syndrome prenatal screening: a theory-informed qualitative study. *BMC Health Services Research*. 2018;18(1).
37. Garvelink MM, Freitas A, Menear M, Brière N, Stacey D, Légaré F. In for a penny, in for a pound: the effect of pre-engaging healthcare organizations on their subsequent participation in trials. *BMC Research Notes*. 2015;8(1):751.
38. Little P, Hayes S. Continuing professional development (CPD): GPs' perceptions of post-graduate education-approved (PGEA) meetings and personal professional development plans (PDPs). 2003;20(2):192-8.
39. Veloshnee G, Loveday P-K. Gender biases and discrimination: a review of health care interpersonal interactions 2007 [Available from: [https://www.who.int/social\\_determinants/resources/gender\\_biases\\_and\\_discrimination\\_wgkn\\_2007.pdf](https://www.who.int/social_determinants/resources/gender_biases_and_discrimination_wgkn_2007.pdf)].
40. Mauvais-Jarvis F, Bairey Merz N, Barnes PJ, Brinton RD, Carrero J-J, Demeo DL, et al. Sex and gender: modifiers of health, disease, and medicine. *The Lancet*. 2020;396(10250):565-82.



- 1  
2  
3  
4  
5  
6  
7  
8  
9  
10  
11  
12  
13  
14  
15  
16  
17  
18  
19  
20  
21  
22  
23  
24  
25  
26  
27  
28  
29  
30  
31  
32  
33  
34  
35  
36  
37  
38  
39  
40  
41  
42  
43  
44  
45  
46  
47  
48  
49  
50  
51  
52  
53  
54  
55  
56  
57  
58  
59  
60
41. Bairey Merz CN, Andersen H, Sprague E, Burns A, Keida M, Walsh MN, et al. Knowledge, Attitudes, and Beliefs Regarding Cardiovascular Disease in Women: The Women's Heart Alliance. *J Am Coll Cardiol*. 2017;70(2):123-32.
  42. Kling JM, Rose SH, Kransdorf LN, Viggiano TR, Miller VM. Evaluation of sex- and gender-based medicine training in post-graduate medical education: a cross-sectional survey study. *Biology of Sex Differences*. 2016;7(S1).
  43. Curran VR, Fleet L, Kirby F. Factors influencing rural health care professionals' access to continuing professional education. *Aust J Rural Health*. 2006;14(2):51-5.
  44. Berndt A, Murray CM, Kennedy K, Stanley MJ, Gilbert-Hunt S. Effectiveness of distance learning strategies for continuing professional development (CPD) for rural allied health practitioners: a systematic review. *BMC Medical Education*. 2017;17(1).
  45. OCDE. *Geographic Variations in Health Care* 2014.
  46. Bertakis KD, Helms LJ, Callahan EJ, Azari R, Robbins JA. The influence of gender on physician practice style. *Med Care*. 1995;33(4):407-16.
  47. Eccles MP, Hrisos S, Francis J, Kaner EF, Dickinson HO, Beyer F, et al. Do self-reported intentions predict clinicians' behaviour: a systematic review. *Implementation Science*. 2006;1(1).
  48. Etherington N, Rodrigues IB, Giangregorio L, Graham ID, Hoens AM, Kasperavicius D, et al. Applying an intersectionality lens to the theoretical domains framework: a tool for thinking about how intersecting social identities and structures of power influence behaviour. *BMC Medical Research Methodology*. 2020;20(1).
  49. Guly HR. Continuing professional development for doctors in accident and emergency. *Journal of Accident & Emergency Medicine*. 2000;17(1):12-4.
  50. Macdermid JC, Graham ID. Knowledge Translation: Putting the "Practice" in Evidence-Based Practice. *Hand Clinics*. 2009;25(1):125-43.



**Figure 1** Flowchart of participants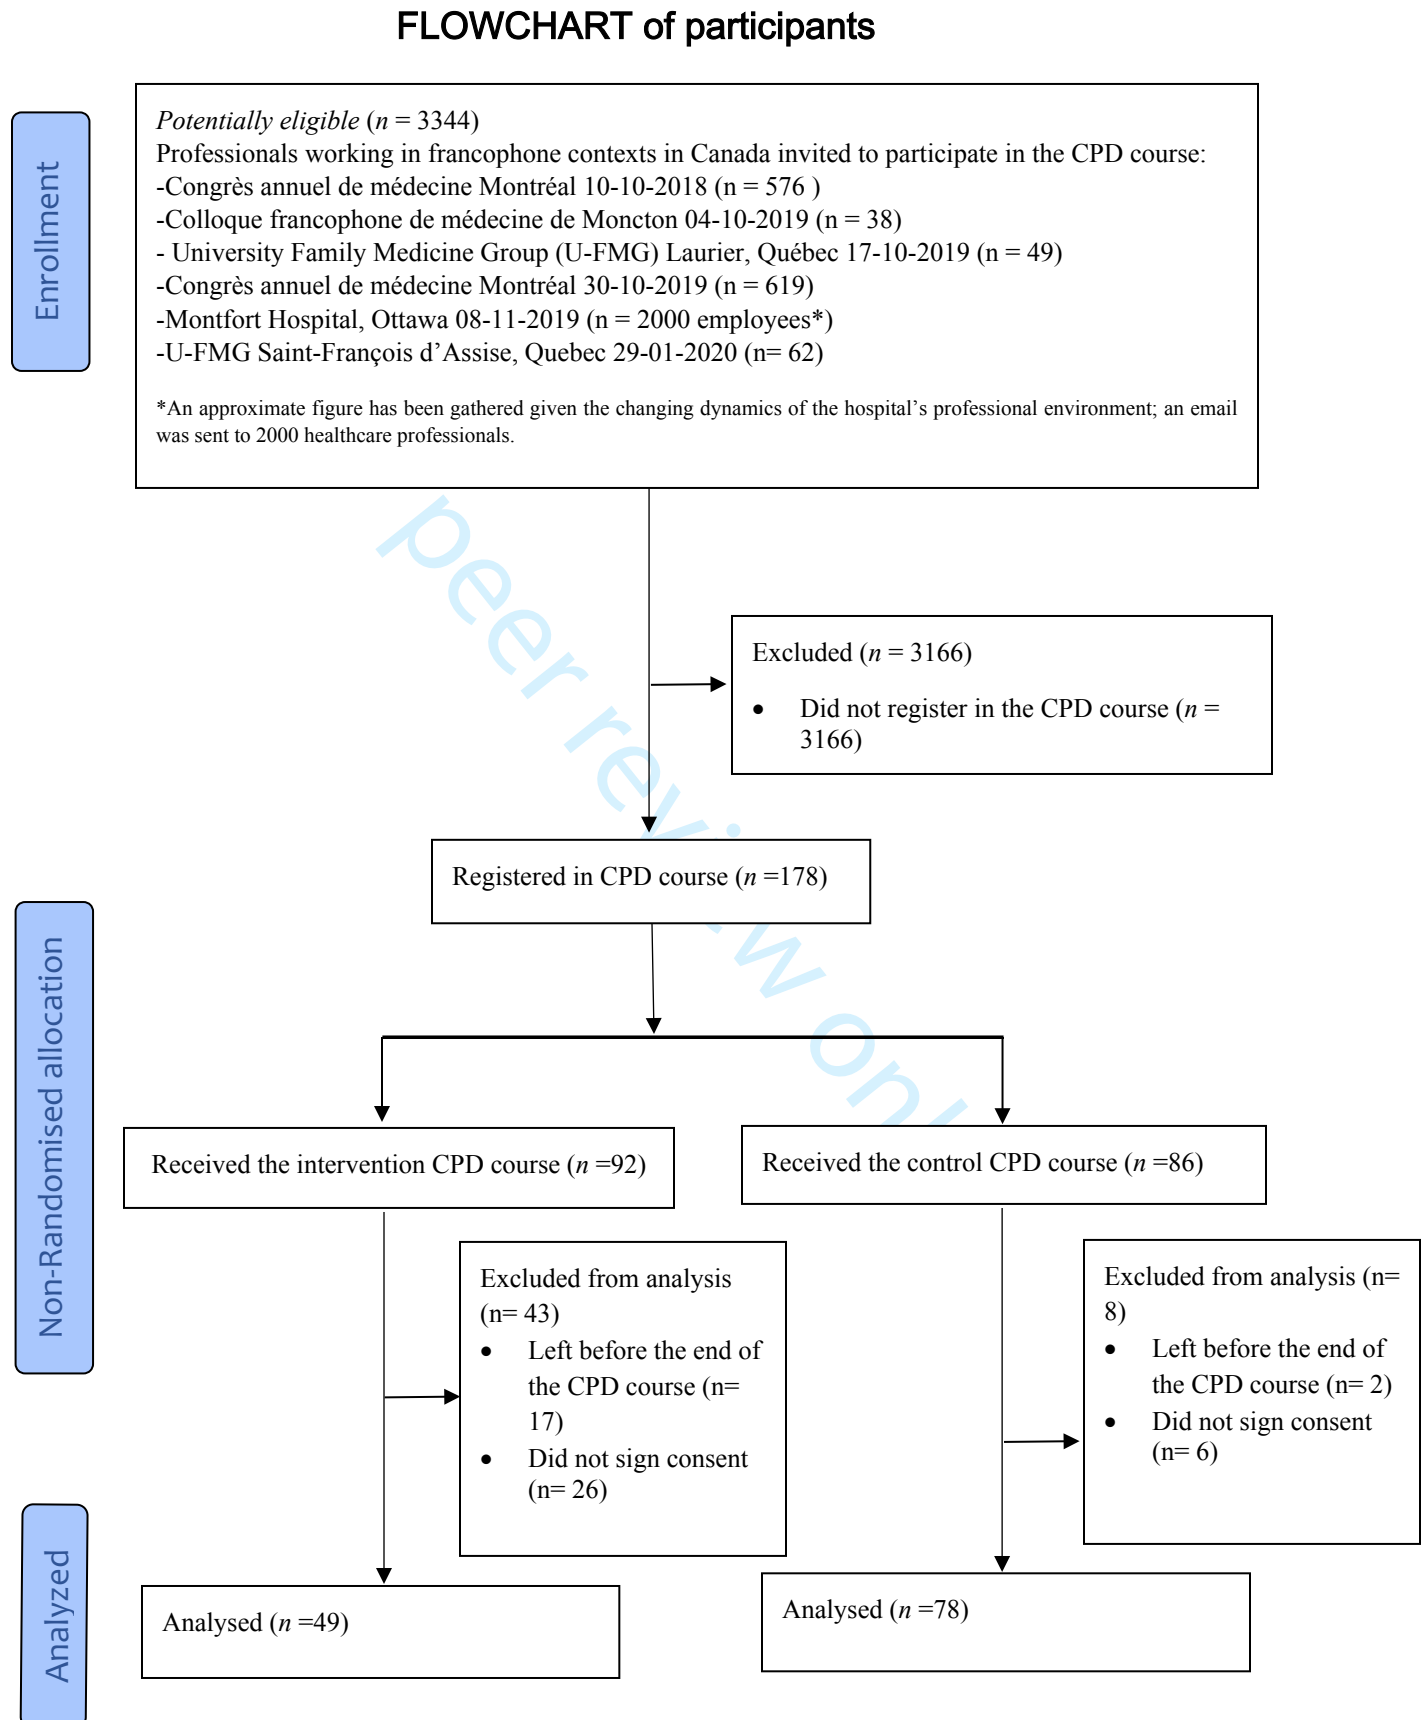

**Supplementary table 1:** Distribution of the scores of intention to include sex and gender considerations in patient care in the clinical context of T2D and depression

|                                | Parametric estimation * |           |                          |                     | Non-parametric estimation <sup>†</sup> |                   |                      |
|--------------------------------|-------------------------|-----------|--------------------------|---------------------|----------------------------------------|-------------------|----------------------|
|                                | Intervention            | Control   | Mean difference (95% CI) | PValue <sup>‡</sup> | Intervention                           | Control           | P Value <sup>£</sup> |
| <b>No. of participants</b>     | 49                      | 78        |                          |                     | 49                                     | 78                |                      |
| <b>Total</b>                   | 5.65±0.19               | 5.19±0.15 | -0.47 (-0.95; 0.01)      | 0.057               | 5.50 (5.00; 6.50)                      | 5.50 (4.50; 6.00) | 0.162                |
| <b>Age (years)</b>             |                         |           |                          |                     |                                        |                   |                      |
| < 44                           | 5.68±0.25               | 5.30±0.18 | -0.38 (-1.00; 0.24)      | 0.226               | 5.50 (5.00; 6.50)                      | 5.50 (5.00; 6.50) | 0.717                |
| ≥ 45                           | 5.92±0.29               | 4.93±0.26 | -0.99 (-1.78; -0.20)     | <b>0.016</b>        | 6.00 (5.00; 6.50)                      | 5.50 (3.50; 6.00) | <b>0.029</b>         |
| <b>Sex</b>                     |                         |           |                          |                     |                                        |                   |                      |
| Men                            | 5.79±0.45               | 4.79±0.34 | -0.99 (-2.19; 0.20)      | 0.098               | 6.00 (5.00; 6.50)                      | 5.25 (3.50; 6.00) | 0.070                |
| Women                          | 5.78±0.21               | 5.24±0.17 | -0.54 (-1.08; 0.00)      | 0.051               | 5.50 (5.00; 6.50)                      | 5.50 (4.50; 6.50) | 0.245                |
| <b>Language</b>                |                         |           |                          |                     |                                        |                   |                      |
| French                         | 5.81±0.20               | 5.35±0.16 | -0.46 (-0.97; 0.05)      | 0.073               | 6.00 (5.00; 6.50)                      | 5.50 (4.50; 6.00) | 0.133                |
| Other                          | 5.70±0.42               | 4.76±0.35 | -0.94 (-2.05; 0.17)      | 0.096               | 5.50 (5.00; 6.50)                      | 5.50 (4.50; 6.00) | 0.346                |
| <b>Province of practice</b>    |                         |           |                          |                     |                                        |                   |                      |
| Quebec                         | 5.85±0.20               | 5.43±0.15 | -0.43 (-0.94; 0.08)      | 0.097               | 6.00 (5.00; 6.50)                      | 5.50 (5.00; 6.50) | 0.144                |
| Ontario                        | 5.83±0.43               | 4.89±0.43 | -0.94 (-2.23; 0.34)      | 0.138               | 6.00 (5.00; 6.50)                      | 5.00 (4.50; 6.00) | 0.223                |
| New Brunswick                  | 5.36±0.73               | 4.00±0.64 | -1.36 (-3.44; 0.72)      | 0.184               | 5.50 (5.00; 5.50)                      | 4.00 (1.00; 6.00) | 0.512                |
| <b>Environment of practice</b> |                         |           |                          |                     |                                        |                   |                      |

|    |       |           |           |          |       |             |        |              |
|----|-------|-----------|-----------|----------|-------|-------------|--------|--------------|
| 1  |       |           |           |          |       |             |        |              |
| 2  |       |           |           |          |       |             |        |              |
| 3  | Urban | 5.74±0.20 | 5.37±0.16 | -0.37 (- | 0.143 | 5.50 (5.00; | 5.50   | 0.486        |
| 4  |       |           |           | 0.88;    |       | 6.50)       | (5.00; |              |
| 5  |       |           |           | 0.13)    |       |             | 6.50)  |              |
| 6  | Rural | 6.38±0.87 | 4.45±0.55 | -1.93 (- | 0.086 | 6.25 (6.00; | 5.25   | <b>0.018</b> |
| 7  |       |           |           | 4.17;    |       | 6.75)       | (3.50; |              |
| 8  |       |           |           | 0.32)    |       |             | 6.00)  |              |
| 9  |       |           |           |          |       |             |        |              |
| 10 |       |           |           |          |       |             |        |              |

---

\*Mean±standard deviation;

†Median (25<sup>th</sup> percentile; 75<sup>th</sup> percentile);

‡Derived from the general linear models;

‡Derived from the Kruskal-Wallis (Wilcoxon) test

For peer review only

**Supplementary table 2:** Recommendations for improving the CPD training, based on barriers and facilitators, using the COM-B model, the Theoretical Domains Framework and the CPD-Reaction questionnaire

| COM-B criteria     | COM-B criteria subcategory | TDF domains linked to COM-B         | Barriers and facilitators perceived by health professionals to including sex and gender considerations in their clinical practice                                   | Psychosocial determinants of the CPD-Reaction questionnaire | Recommendations (COM-B Intervention function)                                                                                                                                                                                                                      |
|--------------------|----------------------------|-------------------------------------|---------------------------------------------------------------------------------------------------------------------------------------------------------------------|-------------------------------------------------------------|--------------------------------------------------------------------------------------------------------------------------------------------------------------------------------------------------------------------------------------------------------------------|
| <b>Opportunity</b> |                            |                                     |                                                                                                                                                                     |                                                             |                                                                                                                                                                                                                                                                    |
|                    | Social                     | Social influence                    | Health professionals assume the patient's sex based on his/her societal role (Barrier)                                                                              | Social influence                                            | In the CPD course, a clinical case vignette could demonstrate the integration of sex and gender considerations and reflect on the different social stigmas associated with gender (Modelling)                                                                      |
|                    | Physical                   | Environmental context and resources | The patient's sex is already recorded in medical notes (Facilitator)                                                                                                |                                                             | CPD training could expand on routine practices that already include sex and gender in clinical practice, example: recording sex, but going further by asking questions about perceived gender, sexual orientation (Training)                                       |
|                    |                            |                                     | The androcentric nature of the French language (the use of masculine generic language to refer to men and women, as well as other gender representations) (Barrier) |                                                             | CPD training could give prompts/cues to demonstrate sex- and gender-sensitive medical language (e.g. revised forms, gender sensitive formulation of questions on sexuality and relationships) to promote equity in clinical practice (Environmental restructuring) |
|                    |                            |                                     | The healthcare professional perceives that the language used by physicians towards a patient may be                                                                 |                                                             | The CPD training could encourage health professionals to self-monitor their use of gender inclusive language (Training/Enablement)                                                                                                                                 |
|                    |                            |                                     |                                                                                                                                                                     |                                                             | CPD training could demonstrate sex- and gender-sensitive behaviours and patterns of speech through video animations of clinical visits between health professionals and their                                                                                      |

1  
2  
3  
4  
5  
6  
7  
8  
9  
10  
11  
12  
13  
14  
15  
16  
17  
18  
19  
20  
21  
22  
23  
24  
25  
26  
27  
28  
29  
30  
31  
32  
33  
34  
35  
36  
37  
38  
39  
40  
41  
42  
43  
44  
45  
46  
47  
48  
49  
50  
51  
52  
53  
54  
55  
56  
57  
58  
59  
60

|                   |                                                                                                                                          |                                                                                                                                            |                                                 |                                                                                                                                                                                                                                              |                                                                                                                                                                                                                                                                  |
|-------------------|------------------------------------------------------------------------------------------------------------------------------------------|--------------------------------------------------------------------------------------------------------------------------------------------|-------------------------------------------------|----------------------------------------------------------------------------------------------------------------------------------------------------------------------------------------------------------------------------------------------|------------------------------------------------------------------------------------------------------------------------------------------------------------------------------------------------------------------------------------------------------------------|
|                   |                                                                                                                                          |                                                                                                                                            | different according to sex and gender (Barrier) |                                                                                                                                                                                                                                              | patients, as well as showing various health professional and patient scenarios (Training)                                                                                                                                                                        |
| <b>Motivation</b> |                                                                                                                                          |                                                                                                                                            |                                                 |                                                                                                                                                                                                                                              |                                                                                                                                                                                                                                                                  |
| Reflective        | Social and professional role and identity                                                                                                | The health professional reflects positively on his/her relationship with the patient (Facilitator)                                         |                                                 |                                                                                                                                                                                                                                              |                                                                                                                                                                                                                                                                  |
|                   | Beliefs about capabilities                                                                                                               | The health professional feels he/she can accurately observe the phenotype of the patient (Facilitator)                                     | Beliefs about capabilities                      |                                                                                                                                                                                                                                              | Self-monitoring of behaviour to encourage health professionals to analyse how they record patient phenotypes: what do they take into consideration? Do they ask specific questions or is it strictly observational? (Enablement)                                 |
|                   | Intentions                                                                                                                               | The health professional has the intention to change his/her therapeutic approach by considering the differences of sex (Facilitator)       | Intention                                       |                                                                                                                                                                                                                                              | Enable health professionals to change their behaviour by demonstrating strategies they have already undertaken to consider the sex of the patient during their therapeutic approaches (Modelling)                                                                |
|                   |                                                                                                                                          | The health professional does not have the intention to change his/her therapeutic approach by considering the differences of sex (Barrier) |                                                 |                                                                                                                                                                                                                                              | Offer information about social consequences of not modifying their care to include sex and gender considerations (Education)<br><br>Offer information about health consequences of not modifying their care to include sex and gender considerations (Education) |
| Goals             | The health professional does not perceive the integration of the concepts of sex and gender in clinical practice as a priority (Barrier) |                                                                                                                                            |                                                 | Enable participants to engage in action planning to include sex and gender considerations in their clinical practice, as well as implementation intentions (Enablement)<br><br>Enable participants to engage in specific goal setting on how |                                                                                                                                                                                                                                                                  |

1  
2  
3  
4  
5  
6  
7  
8  
9  
10  
11  
12  
13  
14  
15  
16  
17  
18  
19  
20  
21  
22  
23  
24  
25  
26  
27  
28  
29  
30  
31  
32  
33  
34  
35  
36  
37  
38  
39  
40  
41  
42  
43  
44  
45  
46  
47  
48  
49  
50  
51  
52  
53  
54  
55  
56  
57  
58  
59  
60

|                   |                                          |                                    |                                                                                                                                     |                            |                                                                                                                                                                                                                                                                                                            |
|-------------------|------------------------------------------|------------------------------------|-------------------------------------------------------------------------------------------------------------------------------------|----------------------------|------------------------------------------------------------------------------------------------------------------------------------------------------------------------------------------------------------------------------------------------------------------------------------------------------------|
|                   |                                          |                                    |                                                                                                                                     |                            | they would include sex and gender considerations in their clinical practice (Goal setting)                                                                                                                                                                                                                 |
|                   |                                          | Beliefs about consequences         | The health professional mentions that he/she would not change her/his therapeutic approach according to the patient's sex (Barrier) | Beliefs about consequences | Offer CPD content with credible sources about the health consequences of not modifying their care to include sex and gender considerations (Education)<br><br>Demonstration of various techniques, shared decision making, cues and prompts that include sex and gender considerations in care (Modelling) |
| <b>Capability</b> |                                          |                                    |                                                                                                                                     |                            |                                                                                                                                                                                                                                                                                                            |
| Psychological     | Memory, Attention and Decision Processes |                                    | The health professional perceives that sex and gender are not systematic in the decision-making process (Barrier)                   |                            | Offer specific training to create routine and habit formation that encourages the systematic inclusion of sex and gender considerations in the decision-making process (Training)                                                                                                                          |
|                   |                                          | Cognitive and interpersonal skills | The health professional does not assume the sex of the patient and acknowledges different treatment methods by sex (Facilitator)    |                            |                                                                                                                                                                                                                                                                                                            |
|                   |                                          |                                    | The health professional acknowledges different clinical representation by sex (Facilitator)                                         |                            |                                                                                                                                                                                                                                                                                                            |
|                   |                                          |                                    | The health professional assumed the sex of the patient when analysing a clinical vignette (Barrier)                                 |                            | As part of skills training, the CPD training could demonstrate how to explore the different aspects of sex attribution, without assuming the sex of the patient (Training)<br><br>Give specific instructions on how to explore the different aspects of sex attribution,                                   |

1  
2  
3  
4  
5  
6  
7  
8  
9  
10  
11  
12  
13  
14  
15  
16  
17  
18  
19  
20  
21  
22  
23  
24  
25  
26  
27  
28  
29  
30  
31  
32  
33  
34  
35  
36  
37  
38  
39  
40  
41  
42  
43  
44  
45  
46  
47  
48  
49  
50  
51  
52  
53  
54  
55  
56  
57  
58  
59  
60

|  |  |           |                                                                                                                  |  |                                                                                                                                                                                                                                                                                                                                                              |
|--|--|-----------|------------------------------------------------------------------------------------------------------------------|--|--------------------------------------------------------------------------------------------------------------------------------------------------------------------------------------------------------------------------------------------------------------------------------------------------------------------------------------------------------------|
|  |  |           |                                                                                                                  |  | <p>without assuming the sex of the patient (Training)</p> <p>Offer feedback on outcome(s) of assuming the sex of the patient in a clinical case vignette (Training)</p> <p>Offer a practice/rehearsal period after receiving instructions on how to explore the different aspects of sex attribution, without assuming the sex of the patient (Training)</p> |
|  |  | Knowledge | The health professional recognizes the differences between sex and gender in scientific literature (Facilitator) |  |                                                                                                                                                                                                                                                                                                                                                              |
|  |  |           | The health professional did not ask the sex of the patient when analyzing a clinical vignette (Barrier)          |  | Include information on the possible clinical outcome(s) of assuming the wrong sex or gender of the patient (Education)                                                                                                                                                                                                                                       |
|  |  |           | The health professional is not aware of the concepts of sex and gender (Barrier)                                 |  | Offer information about health consequences of not considering or confusing sex and gender terms (Education)                                                                                                                                                                                                                                                 |

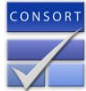

## CONSORT 2010 checklist of information to include when reporting a pilot or feasibility trial\*

| Section/Topic             | Item No | Checklist item                                                                                                                                                                              | Reported on page No |
|---------------------------|---------|---------------------------------------------------------------------------------------------------------------------------------------------------------------------------------------------|---------------------|
| <b>Title and abstract</b> |         |                                                                                                                                                                                             |                     |
|                           | 1a      | Identification as a pilot or feasibility randomised trial in the title                                                                                                                      | 1 (mixed methods)   |
|                           | 1b      | Structured summary of pilot trial design, methods, results, and conclusions (for specific guidance see CONSORT abstract extension for pilot trials)                                         | 4                   |
| <b>Introduction</b>       |         |                                                                                                                                                                                             |                     |
| Background and objectives | 2a      | Scientific background and explanation of rationale for future definitive trial, and reasons for randomised pilot trial                                                                      | 7-8                 |
|                           | 2b      | Specific objectives or research questions for pilot trial                                                                                                                                   | 8                   |
| <b>Methods</b>            |         |                                                                                                                                                                                             |                     |
| Trial design              | 3a      | Description of pilot trial design (such as parallel, factorial) including allocation ratio                                                                                                  | 8                   |
|                           | 3b      | Important changes to methods after pilot trial commencement (such as eligibility criteria), with reasons                                                                                    | 17                  |
| Participants              | 4a      | Eligibility criteria for participants                                                                                                                                                       | 9                   |
|                           | 4b      | Settings and locations where the data were collected                                                                                                                                        | 9-10                |
|                           | 4c      | How participants were identified and consented                                                                                                                                              | 9-10                |
| Interventions             | 5       | The interventions for each group with sufficient details to allow replication, including how and when they were actually administered                                                       | 9-10-11             |
| Outcomes                  | 6a      | Completely defined prespecified assessments or measurements to address each pilot trial objective specified in 2b, including how and when they were assessed                                | 11                  |
|                           | 6b      | Any changes to pilot trial assessments or measurements after the pilot trial commenced, with reasons                                                                                        | NA                  |
|                           | 6c      | If applicable, prespecified criteria used to judge whether, or how, to proceed with future definitive trial                                                                                 | NA                  |
| Sample size               | 7a      | Rationale for numbers in the pilot trial                                                                                                                                                    | 11                  |
|                           | 7b      | When applicable, explanation of any interim analyses and stopping guidelines                                                                                                                | NA                  |
| Randomisation:            |         |                                                                                                                                                                                             |                     |
| Sequence generation       | 8a      | Method used to generate the random allocation sequence                                                                                                                                      | NA                  |
|                           | 8b      | Type of randomisation(s); details of any restriction (such as blocking and block size)                                                                                                      | NA                  |
| Allocation concealment    | 9       | Mechanism used to implement the random allocation sequence (such as sequentially numbered containers), describing any steps taken to conceal the sequence until interventions were assigned | NA                  |



|                                                      |     |                                                                                                                                                                                       |       |
|------------------------------------------------------|-----|---------------------------------------------------------------------------------------------------------------------------------------------------------------------------------------|-------|
| mechanism                                            |     |                                                                                                                                                                                       |       |
| Implementation                                       | 10  | Who generated the random allocation sequence, who enrolled participants, and who assigned participants to interventions                                                               | NA    |
| Blinding                                             | 11a | If done, who was blinded after assignment to interventions (for example, participants, care providers, those assessing outcomes) and how                                              | 10    |
|                                                      | 11b | If relevant, description of the similarity of interventions                                                                                                                           | 10    |
| Statistical methods                                  | 12  | Methods used to address each pilot trial objective whether qualitative or quantitative                                                                                                | 12-13 |
| <b>Results</b>                                       |     |                                                                                                                                                                                       |       |
| Participant flow (a diagram is strongly recommended) | 13a | For each group, the numbers of participants who were approached and/or assessed for eligibility, randomly assigned, received intended treatment, and were assessed for each objective | 13    |
|                                                      | 13b | For each group, losses and exclusions after randomisation, together with reasons                                                                                                      | 13    |
| Recruitment                                          | 14a | Dates defining the periods of recruitment and follow-up                                                                                                                               | 13    |
|                                                      | 14b | Why the pilot trial ended or was stopped                                                                                                                                              | NA    |
| Baseline data                                        | 15  | A table showing baseline demographic and clinical characteristics for each group                                                                                                      | 14    |
| Numbers analysed                                     | 16  | For each objective, number of participants (denominator) included in each analysis. If relevant, these numbers should be by randomised group                                          | 15    |
| Outcomes and estimation                              | 17  | For each objective, results including expressions of uncertainty (such as 95% confidence interval) for any estimates. If relevant, these results should be by randomised group        | 15-16 |
| Ancillary analyses                                   | 18  | Results of any other analyses performed that could be used to inform the future definitive trial                                                                                      | NA    |
| Harms                                                | 19  | All important harms or unintended effects in each group (for specific guidance see CONSORT for harms)                                                                                 | NA    |
|                                                      | 19a | If relevant, other important unintended consequences                                                                                                                                  | NA    |
| <b>Discussion</b>                                    |     |                                                                                                                                                                                       |       |
| Limitations                                          | 20  | Pilot trial limitations, addressing sources of potential bias and remaining uncertainty about feasibility                                                                             | 23    |
| Generalisability                                     | 21  | Generalisability (applicability) of pilot trial methods and findings to future definitive trial and other studies                                                                     | 23    |
| Interpretation                                       | 22  | Interpretation consistent with pilot trial objectives and findings, balancing potential benefits and harms, and considering other relevant evidence                                   | 21-22 |
|                                                      | 22a | Implications for progression from pilot to future definitive trial, including any proposed amendments                                                                                 | 23    |
| <b>Other information</b>                             |     |                                                                                                                                                                                       |       |
| Registration                                         | 23  | Registration number for pilot trial and name of trial registry                                                                                                                        | 5     |
| Protocol                                             | 24  | Where the pilot trial protocol can be accessed, if available                                                                                                                          | NA    |
| Funding                                              | 25  | Sources of funding and other support (such as supply of drugs), role of funders                                                                                                       | 25    |
|                                                      | 26  | Ethical approval or approval by research review committee, confirmed with reference number                                                                                            | 26    |

1 Citation: Eldridge SM, Chan CL, Campbell MJ, Bond CM, Hopewell S, Thabane L, et al. CONSORT 2010 statement: extension to randomised pilot and feasibility trials. BMJ. 2016;355.  
2  
3 \*We strongly recommend reading this statement in conjunction with the CONSORT 2010, extension to randomised pilot and feasibility trials, Explanation and Elaboration for important  
4 clarifications on all the items. If relevant, we also recommend reading CONSORT extensions for cluster randomised trials, non-inferiority and equivalence trials, non-pharmacological  
5 treatments, herbal interventions, and pragmatic trials. Additional extensions are forthcoming: for those and for up to date references relevant to this checklist, see [www.consort-statement.org](http://www.consort-statement.org).  
6  
7  
8  
9  
10  
11  
12  
13  
14  
15  
16  
17  
18  
19  
20  
21  
22  
23  
24  
25  
26  
27  
28  
29  
30  
31  
32  
33  
34  
35  
36  
37  
38  
39  
40  
41  
42

For peer review only

# BMJ Open

## Integration of Sex and Gender in a Continuing Professional Development Course on Diabetes and Depression: A Mixed Methods Feasibility Study

|                                 |                                                                                                                                                                                                                                                                                                                                                                                                                                                                                                                                                                                                                                                                                                                                                                                                                                                                                                                                                                                                                                                                                                                                                                                                                                                       |
|---------------------------------|-------------------------------------------------------------------------------------------------------------------------------------------------------------------------------------------------------------------------------------------------------------------------------------------------------------------------------------------------------------------------------------------------------------------------------------------------------------------------------------------------------------------------------------------------------------------------------------------------------------------------------------------------------------------------------------------------------------------------------------------------------------------------------------------------------------------------------------------------------------------------------------------------------------------------------------------------------------------------------------------------------------------------------------------------------------------------------------------------------------------------------------------------------------------------------------------------------------------------------------------------------|
| Journal:                        | <i>BMJ Open</i>                                                                                                                                                                                                                                                                                                                                                                                                                                                                                                                                                                                                                                                                                                                                                                                                                                                                                                                                                                                                                                                                                                                                                                                                                                       |
| Manuscript ID                   | bmjopen-2021-050890.R1                                                                                                                                                                                                                                                                                                                                                                                                                                                                                                                                                                                                                                                                                                                                                                                                                                                                                                                                                                                                                                                                                                                                                                                                                                |
| Article Type:                   | Original research                                                                                                                                                                                                                                                                                                                                                                                                                                                                                                                                                                                                                                                                                                                                                                                                                                                                                                                                                                                                                                                                                                                                                                                                                                     |
| Date Submitted by the Author:   | 10-Dec-2021                                                                                                                                                                                                                                                                                                                                                                                                                                                                                                                                                                                                                                                                                                                                                                                                                                                                                                                                                                                                                                                                                                                                                                                                                                           |
| Complete List of Authors:       | Deom Tardif, Alèxe; VITAM Centre de recherche en santé durable; Université Laval, Department of Social and Preventative Medicine<br>Gogovor, Amédé; Knowledge Translation and Implementation component of the Quebec SPOR-SUPPORT Unit; Université Laval, Department of Family Medicine and Emergency Medicine<br>Guay-Bélanger, Sabrina ; VITAM Centre de recherche en sante durable; Tier 1 Canada Research Chair in Shared Decision Making and Knowledge Translation, Université Laval<br>Audet, Denis; University Family Medicine Group Saint-François-d'Assise<br>Parent, Nicole; Médecins francophones du Canada<br>Gaudreau, André; Patient-partner<br>Remy-Lamarche, Danièle; Patient-Partner<br>Vigneault, Luc; Patient-Partner<br>Ngueta, Gérard; VITAM - Centre de recherche en santé durable, Centre intégré universitaire de santé et services sociaux<br>Bilodeau, André; McGill University Faculty of Medicine and Health Sciences, Department of Family Medicine<br>Légaré, France; Université Laval, Department of Family Medicine and Emergency Medicine; Tier 1 Canada Research Chair in Shared Decision Making and Knowledge Translation, Université Laval<br>mATrICES-F Group, the; VITAM - Centre de recherche en santé durable |
| <b>Primary Subject Heading</b>: | Medical education and training                                                                                                                                                                                                                                                                                                                                                                                                                                                                                                                                                                                                                                                                                                                                                                                                                                                                                                                                                                                                                                                                                                                                                                                                                        |
| Secondary Subject Heading:      | General practice / Family practice                                                                                                                                                                                                                                                                                                                                                                                                                                                                                                                                                                                                                                                                                                                                                                                                                                                                                                                                                                                                                                                                                                                                                                                                                    |
| Keywords:                       | EDUCATION & TRAINING (see Medical Education & Training), PUBLIC HEALTH, PRIMARY CARE                                                                                                                                                                                                                                                                                                                                                                                                                                                                                                                                                                                                                                                                                                                                                                                                                                                                                                                                                                                                                                                                                                                                                                  |
|                                 |                                                                                                                                                                                                                                                                                                                                                                                                                                                                                                                                                                                                                                                                                                                                                                                                                                                                                                                                                                                                                                                                                                                                                                                                                                                       |

SCHOLARONE™  
Manuscripts



I, the Submitting Author has the right to grant and does grant on behalf of all authors of the Work (as defined in the below author licence), an exclusive licence and/or a non-exclusive licence for contributions from authors who are: i) UK Crown employees; ii) where BMJ has agreed a CC-BY licence shall apply, and/or iii) in accordance with the terms applicable for US Federal Government officers or employees acting as part of their official duties; on a worldwide, perpetual, irrevocable, royalty-free basis to BMJ Publishing Group Ltd ("BMJ") its licensees and where the relevant Journal is co-owned by BMJ to the co-owners of the Journal, to publish the Work in this journal and any other BMJ products and to exploit all rights, as set out in our [licence](#).

The Submitting Author accepts and understands that any supply made under these terms is made by BMJ to the Submitting Author unless you are acting as an employee on behalf of your employer or a postgraduate student of an affiliated institution which is paying any applicable article publishing charge ("APC") for Open Access articles. Where the Submitting Author wishes to make the Work available on an Open Access basis (and intends to pay the relevant APC), the terms of reuse of such Open Access shall be governed by a Creative Commons licence – details of these licences and which [Creative Commons](#) licence will apply to this Work are set out in our licence referred to above.

Other than as permitted in any relevant BMJ Author's Self Archiving Policies, I confirm this Work has not been accepted for publication elsewhere, is not being considered for publication elsewhere and does not duplicate material already published. I confirm all authors consent to publication of this Work and authorise the granting of this licence.

1  
2  
3 **Integration of Sex and Gender in a Continuing Professional Development Course on**  
4 **Diabetes and Depression: A Mixed Methods Feasibility Study**  
5

6  
7 Deom Tardif A<sup>1,2,3</sup>, Gogovor, A<sup>1,3,4,5</sup>, Guay-Bélanger S<sup>1,3</sup>, Audet D<sup>6</sup>, Parent N<sup>7</sup>, Gaudreau  
8 A<sup>8</sup>, Rémy-Lamarche D<sup>8</sup>, Vigneault L<sup>8</sup>, Ngueta G<sup>1</sup>, Bilodeau A<sup>9</sup>, Légaré F<sup>1,3,4,5</sup> and the  
9 mATrICES-F Group  
10  
11

12  
13 <sup>1</sup>VITAM – Centre de recherche en santé durable, Centre intégré universitaire de santé et  
14 services sociaux de la Capitale-Nationale, Quebec City, Quebec, Canada  
15

16  
17 <sup>2</sup>Department of Social and Preventative Medicine, Faculty of Medicine, Université Laval,  
18 Quebec City, Quebec, Canada  
19

20  
21 <sup>3</sup>Tier 1 Canada Research Chair in Shared Decision Making and Knowledge Translation,  
22 Université Laval, Quebec City, Quebec, Canada  
23

24  
25 <sup>4</sup>Department of Family Medicine and Emergency Medicine, Faculty of Medicine,  
26 Université Laval, Quebec City, Quebec, Canada  
27

28  
29 <sup>5</sup>Quebec SPOR Support Unit, Quebec City, Quebec, Canada  
30

31  
32 <sup>6</sup>University Family Medicine Group Saint-François-d'Assise, Quebec City, Quebec,  
33 Canada  
34

35  
36 <sup>7</sup>Médecins francophones du Canada, Montreal, Quebec, Canada  
37

38  
39 <sup>8</sup>Patient Partner, Quebec, Canada  
40

41  
42 <sup>9</sup>Department of Family Medicine, Faculty of Medicine and Health Sciences,  
43 McGill University, Montreal, Quebec, Canada  
44

**Collaborators mATrICES-F Group:**

Alèxe Deom Tardif, Université Laval

Amédé Gogovor, Université Laval

André Bilodeau, McGill University

André Bussièrès, McGill University

André Gaudreau, Patient-partner

Audrey Ferron Parayre, University of Ottawa

Caroline Jose, Université de Moncton

Danièle Remy-Lamarche, Patient-partner

Dawn Stacey, University of Ottawa

Denis Audet, University Family Medicine Group Saint-François-d'Assise

Denis Prud'homme, Université de Moncton

France Légaré, Université Laval

Francine Borduas, Médecins francophones du Canada

Gerard Ngueta, VITAM – Centre de recherche en santé durable

Geneviève Roch, Université Laval

Hélène Lee-Gosselin, Université Laval

Laurie Laplanche, Université Laval

Luc Vigneault, Patient-partner

Maman Joyce Dogba, Université Laval

Marie-Claude Tremblay, Université Laval

Marie-Pierre Gagnon, Université Laval

1  
2  
3 Nicole Parent, Médecins francophones du Canada  
4

5 Sabrina Guay-Bélanger, VITAM – Centre de recherche en santé durable  
6

7  
8 Sophie Desroches, Université Laval  
9

10 Valérie Borde, Centre DECLIC  
11

12 **Corresponding author:**  
13

14  
15 France Légaré, BSc Arch, MD, MSc, PhD, CCFP, FCFP.  
16

17 VITAM – Centre de recherche en santé durable  
18

19 Pavillon Landry-Poulin, entrée A-12, bureau A-4574  
20

21  
22 2525, chemin de la Canardière  
23

24 Quebec City, Quebec, G1J 0A4, Canada  
25

26  
27 Email: [France.legare@mfa.ulaval.ca](mailto:France.legare@mfa.ulaval.ca)  
28  
29  
30  
31

32 **Email addresses:**  
33

34 ADT: [alexe.deom-tardif.1@ulaval.ca](mailto:alexe.deom-tardif.1@ulaval.ca)  
35

36  
37 AGo: [amede.gogovor.1@ulaval.ca](mailto:amede.gogovor.1@ulaval.ca)  
38

39 SGB: [sabrina.guay-belanger.ciusscn@ssss.gouv.qc.ca](mailto:sabrina.guay-belanger.ciusscn@ssss.gouv.qc.ca)  
40

41 DA: [audet\\_denis@videotron.ca](mailto:audet_denis@videotron.ca)  
42

43  
44 NP: [nparent@medecinsfrancophones.ca](mailto:nparent@medecinsfrancophones.ca)  
45

46  
47 AGa: [andrepositif@outlook.com](mailto:andrepositif@outlook.com)  
48

49 DRL: [remy\\_lamarche.daniele@videotron.ca](mailto:remy_lamarche.daniele@videotron.ca)  
50

51  
52 LV: [luc.vigneault2@gmail.com](mailto:luc.vigneault2@gmail.com)  
53

54  
55 GN: [gerard.ngueta.ciusscn@ssss.gouv.qc.ca](mailto:gerard.ngueta.ciusscn@ssss.gouv.qc.ca)  
56

57  
58 AB: [andre.bilodeau@mcgill.ca](mailto:andre.bilodeau@mcgill.ca)  
59  
60

## Abstract

**Objectives** Assess the feasibility and impact of a continuous professional development (CPD) course on type-2 diabetes and depression on health professionals' intention to include sex and gender considerations in patient care.

**Design and setting** In collaboration with CPD organisations and patient-partners, we conducted a mixed-methods feasibility controlled trial with post-intervention measures in three Canadian provinces.

**Participants** Of 178 eligible health professionals, 127 completed questionnaires and 67 participated in semi-structured group discussions.

**Intervention and comparator** An interactive one-hour CPD course, co-designed with patient-partners, on diabetes and depression with sex and gender considerations (intervention) was compared to a similar course without these considerations (comparator).

**Outcomes** Feasibility of recruitment and retention of CPD organisations and patient-partners throughout the study; adherence to planned activities; health professionals' intention to include sex and gender considerations in patient care as measured by the CPD-Reaction questionnaire; and barriers and facilitators using the Theoretical Domains Framework.

**Results** All recruited CPD organisations and patient-partners remained engaged throughout the study. All planned CPD courses occurred. Overall, 71% of eligible health professionals participated (63% under 44 years old; 79.5% women; 67.7% practising in French; 66.9% practising in Quebec; 78.8% in urban practice). After training, mean intention scores for the intervention (n=49) and control groups (n=78) were  $5.65 \pm 0.19$  and  $5.19 \pm 0.15$ , respectively. Mean difference was  $-0.47$  (CI  $-0.95$  to  $0.01$ ;  $p=0.06$ ). Adjusted for age, gender and practice settings, mean difference was  $-0.57$  (CI  $-1.09$  to  $-0.05$ ;  $p=0.03$ ). We identified eight Theoretical Domains related to barriers and six related to facilitators for providing sex- and gender-adapted diabetes and depression care.

**Conclusions** CPD training on diabetes and depression that includes sex and gender considerations is feasible and, compared to CPD training that does not, may prompt health



1  
2  
3 professionals to modify their care. Addressing identified barriers and facilitators could  
4 increase intention.  
5

6  
7 **Registration number:** NCT03928132 with ClinicalTrials.gov.  
8

9  
10 **Keywords:** Sex and gender, knowledge translation, continuous professional development,  
11 diabetes, depression, patient engagement, Theory of Planned Behaviour, Theoretical  
12 Domains, COM-B  
13  
14  
15  
16  
17  
18  
19  
20  
21  
22  
23  
24  
25  
26  
27  
28  
29  
30  
31  
32  
33  
34  
35  
36  
37  
38  
39  
40  
41  
42  
43  
44  
45  
46  
47  
48  
49  
50  
51  
52  
53  
54  
55  
56  
57  
58  
59  
60

### Strengths and limitations of this study

- Continuous professional development (CPD) courses that included sex and gender considerations were co-designed with patients experiencing diabetes and/or depression.
- Outcome measures were informed by theory.
- This mixed-methods controlled trial used post-intervention measures only, as pre-intervention measures were not feasible. Although randomized allocation of participants was not possible, it was feasible to conduct a mixed-methods controlled trial.

## INTRODUCTION

A variety of research initiatives are attempting to reduce health inequities between men and women (1, 2). Research that includes sex- and gender-based analysis results in more accurate evidence, more relevant recommendations, more specifically-targeted interventions, and better outcomes (3-6). Sex differences are biology-linked differences between females and males caused by different sex chromosomes, sex-specific gene expression of autosomes, sex hormones, and their effects on organ systems (7). Gender differences arise from sociocultural processes such as the different behaviours of women and men, their exposure to environmental influences, impacts of nutrition, lifestyles or stress, and attitudes towards illness, treatment and prevention (7). Gender roles and gender identity are influenced by a complex interplay between genetic, endocrinal, and social factors (8). Finally, sex and gender are not straightforward binary categories. Many femininities and masculinities exist and can influence other important sociodemographic variables (9).

During their lifetime women are twice as likely as men to be diagnosed with depression. In contrast, three times as many men commit suicide (5, 10, 11). Recent evidence supports a link between type 2 diabetes (T2D) and depression, and shows that sex and gender are influential factors in this comorbidity (7, 9). The prevalence of depression in diabetic patients is higher in females than males (23.8% and 12.8%, respectively) (7). On the other hand, a pooled result from 32 studies described that the risk of developing T2D in patients diagnosed with depression is higher in men than in women (RC=1.63 vs RC=1.29, respectively) (7, 12, 13). The differences are explained by biological differences and psychosocial factors such as body mass index, differences in the distribution of types of adipose tissue, an imbalance of sex hormones, socioeconomic status, psychosocial stress, and sleep deprivation (7, 9). Co-morbidity and mortality associated with the complications of T2D and depression are also different for men and women. For instance, men develop diabetic food syndrome at earlier ages and are more likely to have complications leading to amputations (7, 14). Women, on the other hand, have a higher risk of metabolic syndrome and fatal coronary heart disease than men (7, 15, 16). T2D and depression are also affected by gender differences. This gap could be explained in part by the different

1  
2  
3 behaviours associated gender representations of men and women, as well as their different  
4 perceptions of stress (17-19).

7 Despite the impacts of sex and gender differences on prevalence, diagnosis, treatment,  
8 outcomes, and equity, evidence on the importance of these differences has yet to be  
9 translated adequately into clinical training or practice (2, 5, 20). For example, a 2017  
10 review suggested that only 35% of studies on Canadian practice guidelines, a cornerstone  
11 of knowledge translation, reported screening, diagnosis or management considerations  
12 specific to sex or gender, and only 25% used the terms “sex” and “gender” correctly (21).

18 Continuing professional development (CPD) is another cornerstone of knowledge  
19 translation as it mobilizes professional and regulatory bodies as well as educational  
20 institutions to foster changes in clinical practice (22, 23). We argue that integrating sex  
21 and gender considerations into CPD is a promising avenue for addressing the inequities  
22 between men and women (5). We define CPD as all educational activities serving to  
23 maintain or increase the knowledge, skills, work performance, and relationships that a  
24 clinician needs to serve patients, the public or the profession. (5, 24, 25). Courses should  
25 be informed by theory-based factors known to influence the adoption of a given  
26 behaviour. Although one of several other factors influencing behaviour change, such as  
27 organizational constraints, intention is considered an acceptable proxy. Indeed, according  
28 to Godin’s integrated model for health professional behaviour change, behavioral  
29 intention is the central influencing factor on behaviour adoption. In turn, this intention is  
30 under the influence of a number of other socio-cognitive factors (26). We aimed to assess  
31 the feasibility and impact of including sex and gender considerations in a CPD course on  
32 T2D and depression on health professionals’ intention to include sex and gender  
33 considerations in patient care.

## 46 **METHODS**

### 49 **Study design and setting**

51 We conducted a non-randomized mixed-methods study with a concurrent embedded  
52 design: (1) a two-arm non-randomized controlled trial with post-intervention measures  
53 only; and (2) semi-structured group discussions following the CPD course. We used the  
54  
55  
56  
57

1  
2  
3 Theory of Planned Behavior for quantitative analysis (27, 28), the Theoretical Domains  
4 Framework (TDF) for qualitative analysis (29, 30), and the COM-B (Capability,  
5 Opportunity, Motivation and Behavior) model to triangulate findings (31). We followed  
6 the CONSORT extension for Pilot and Feasibility Trials Checklist to report results (32).  
7  
8  
9

10 This project is one of six that were funded by the Canadian Institutes of Health Research  
11 to explore sex and gender issues in knowledge translation (33), gender transformative  
12 approaches to knowledge translation, and sex- and gender-based analysis (5, 33).  
13  
14  
15

16 A multidisciplinary team was created of 25 researchers: two sex and gender specialists,  
17 three patient-partners with experience with T2D and/or mental health issues (two men  
18 and one woman), two physicians, one nurse, two CPD managers, one research assistant  
19 and two trainees. An executive committee of 12 team members (including all patient-  
20 partners) held monthly meetings addressing the main concerns in each research phase.  
21 They chose the clinical topic of the course based on needs expressed by CPD providers  
22 (see Intervention below). They then adapted an existing diabetes and depression CPD  
23 course to include sex and gender considerations and contacted CPD providers in three  
24 Canadian provinces to collaborate on implementing the courses.  
25  
26  
27  
28  
29  
30  
31

### 32 **Patient involvement**

33  
34 Three patient-partners, core members of the executive committee, contributed to  
35 governance (e.g., attending meetings and courses, making executive decisions) and  
36 intervention design. They contributed their experience to the CPD course, helped collect  
37 data and interpret results, coauthored this paper and advised us on plain language use for  
38 our presentations.  
39  
40  
41  
42  
43

### 44 **Participants and recruitment**

45  
46 All health professionals working in the clinical settings where our CPD course was  
47 advertised, including hospitals and family medicine groups, or participating in the  
48 continuing medical education (CME) conference where the course was to be offered,  
49 were invited to participate. Invitations were by email and through the Internet registration  
50 platforms of CME conferences in three Canadian provinces (Quebec, Ontario, New-  
51 Brunswick). Participants stayed in their respective groups for the semi-structured group  
52  
53  
54  
55  
56  
57  
58  
59  
60

1  
2  
3 discussion that immediately followed the CPD course. Inclusion criteria were: practising  
4 health professionals available to participate in person for the whole course; and fluent in  
5 French (all our CPD courses were in French). Ethical approval was obtained from the  
6 Centre intégré universitaire de santé et de services sociaux de la Capitale-Nationale  
7 (CIUSSS-CN) Ethics Board (2017-2018-16 MP), the Hôpital Montfort Research ethics  
8 board (19-20-05-009), and the Vitalité Health Network research ethics board (CER-2019-  
9 18).

## 16 **Intervention**

18 Informed by a continuing medical education needs assessment by our key CPD  
19 stakeholder and partner, Médecins francophones du Canada (data not published), we  
20 chose patients with T2D and depression combined as the clinical topic, as physicians felt  
21 there was a gap in their education about this comorbidity. There is growing evidence of  
22 a link between T2D and depression and the importance of sex as a risk factor for this  
23 comorbidity (34-36). The team adapted an existing T2D and depression CPD course to  
24 include evidence-based sex and gender considerations. The original course, a 1-hour  
25 classroom-based activity, describes links between TD2 and depression, reviews  
26 CANMAT 2016 Depression Guidelines and reviews pharmacological and non-  
27 pharmacological treatment of TD2 and depression. We added sex- and gender-specific  
28 content including: 1) definitions and differences between the concepts of sex and gender,  
29 2) epidemiological data on the differences in incidence, prevalence, morbidity and  
30 mortality between men and women with T2D and depression, and 3) a video explaining  
31 sex biases associated with these two conditions. The adapted CPD course (intervention)  
32 kept the original duration (one hour) and medical content of the original course  
33 (comparator). Links between T2D and depression were explained together with sex and  
34 gender differences, and reviews of pharmacological and non-pharmacological treatments  
35 were condensed. As per patient-partners' recommendations, we also held 30-minute  
36 semi-structured group discussions with both the intervention and control group  
37 immediately following the course. In the group discussion we presented a clinical case  
38 vignette on managing a patient with T2D and depression in which the health  
39 professional's behaviour exhibited various divergences with best clinical practices. We  
40  
41  
42  
43  
44  
45  
46  
47  
48  
49  
50  
51  
52  
53  
54  
55  
56  
57  
58  
59  
60

1  
2  
3 asked participants to write down the main divergence and to categorize it within five  
4 categories determined by our team: 1) failure to mention positive factors for recovery, 2)  
5 failure to engage the patient in their health-related decision, 3) sex and gender biases, 4)  
6 failure to take into account notions of sex and gender, and 5) cannot be categorized. We  
7 prompted participants to discuss their perception of sex and gender considerations by  
8 linking them to the clinical vignette and to their clinical experience of integrating sex and  
9 gender considerations in general.  
10  
11  
12  
13  
14

15  
16 Depending on the setting (hospitals, family medicine groups, CME conferences) we either  
17 (1) assigned the participants to the control or intervention group on their arrival to achieve  
18 a balanced number of participants in both groups or (2) the participants registered in one  
19 group or the other, both groups being blinded to the intervention and control group.  
20 Efforts were made to equally divide groups regarding number and gender of participants.  
21 At registration, participants were told that it was a research project that required their  
22 consent. Participants could attend the course and receive CME credits whether they chose  
23 to participate in the study or not. All CPD courses were delivered by the same two  
24 physicians (one man, assigned to the control group, and one woman, assigned to the  
25 intervention group) in all the research settings. We planned to offer six courses (three  
26 intervention and three control), two in each province (control and intervention  
27 simultaneously). Each course (both control and intervention) was a 45-minute lecture on  
28 T2D and depression followed by 15 minutes to fill in the CPD-Reaction questionnaire.  
29 An additional 30 minutes was planned for the semi-structured group discussion.  
30  
31  
32  
33  
34  
35  
36  
37  
38  
39  
40

### 41 **Outcome Measures**

42  
43 We assessed three feasibility outcome measures: recruitment, retention and adherence: 1)  
44 recruitment of >90 course participants for six courses and study participation rate of  
45 >70% (28, 37), 2) retention of CPD organisations, collaborators and patient-partners  
46 throughout the project, 3) the holding of all planned CPD courses in all three provinces.  
47 Sample size was based on consultations with clinic managers and CPD providers and on  
48 practical considerations (e.g. average size of CPD courses, venues, the course being  
49 provided in French only).  
50  
51  
52  
53  
54  
55  
56  
57  
58  
59  
60

1  
2  
3 We used CPD-Reaction (French version) to measure participants' behavioural intention  
4 to include sex and gender considerations in patient care. CPD-Reaction is a self-  
5 administered questionnaire (Cronbach  $\alpha$  0.79–0.89) (38, 39). Twelve items measure five  
6 constructs determined through a systematic review of theory-driven studies of behaviour  
7 change in health professionals: 1) behavioural intention, 2) beliefs about capabilities, 3)  
8 social influences, 4) beliefs about consequences, and 5) moral norm (37). The score for  
9 each construct is computed as the average of each item (Likert scale of 1 to 7), except for  
10 social influence, which is rated on a Likert scale of 1 to 5 (28). There is no global score.  
11 Finally, in group discussions, we identified barriers and facilitators to including sex and  
12 gender considerations in caring for patients with T2D and depression and mapped them  
13 onto the TDF. The TDF was developed through a consensus of experts who consolidated  
14 33 psychosocial theories of behaviour change to generate 14 domains (40).

### 24 **Data collection**

25  
26  
27 Quantitative data were collected post-intervention with the CPD-Reaction questionnaire  
28 and sociodemographic questions (38). Semi-structured qualitative discussion took place  
29 in both intervention and control groups after the questionnaires were completed so as not  
30 to influence quantitative results. In both intervention and control groups, discussions were  
31 recorded and transcribed.

### 36 **Analysis**

#### 38 **Quantitative analysis**

39  
40  
41 Categorical variables were described by reporting absolute (n) and relative (%)  
42 frequencies. Continuous variables were described by their measure of central tendency  
43 (mean and/or median) and dispersion (standard deviation and percentiles). Covariance  
44 analysis was used to compare the scores of the intervention and control groups. As the  
45 intention did not have a perfectly Gaussian distribution, we also compared intention  
46 scores using Wilcoxon's non-parametric analysis and used the Kruskal-Wallis test to  
47 compare medians. We used Spearman's rank test to assess the correlation between the  
48 intention scores and psychosocial factors (social influence, beliefs about capabilities,  
49 moral norms, beliefs about consequences). We used general linear models to assess  
50  
51  
52  
53  
54  
55  
56  
57  
58  
59  
60



1  
2  
3 whether the intention score varied significantly from the control group to intervention  
4 group after adjusting for confounding factors. These factors were identified using the 10%  
5 change in the regression coefficient associated with the exposure variable (41, 42).  
6  
7 However, to increase the appearance validity of the model, we constructed a separate  
8 model in which we forced age, gender and practice environment. SAS software (version  
9 9.4) was used for all statistical analyses. The empirical significance threshold (P value)  
10 was set at 0.05 in bilateral analysis.  
11  
12  
13  
14  
15

### 16 **Qualitative analysis**

17  
18 The discussion transcripts were imported into N'Vivo V.12 for analysis. Using the TDF  
19 as a guide, two researchers reviewed and agreed on codes and data were simultaneously  
20 coded using a thematic deductive approach (ADT, AGo) (43). Data were then refined into  
21 TDF domains. As the discussion occurred in French, all illustrative quotes were translated  
22 into English by a master's student (ADT) and reviewed by a scientific translator. We  
23 calculated the frequency of each barrier and facilitator by recording the number of times  
24 it was mentioned in the four group discussions (GDs 1 to 4).  
25  
26  
27  
28  
29  
30

### 31 **Triangulating quantitative and qualitative data**

32  
33 We triangulated quantitative and qualitative data to propose practical theory-driven  
34 recommendations for improving our CPD intervention (44). We compared the five  
35 psychosocial determinants measured in the CPD-Reaction questionnaire to the domains  
36 of the TDF. We observed where quantitative and qualitative data converged, where they  
37 offered additional information on the same constructs, and where they diverged. We  
38 derived recommendations using the COM-B model of behaviour (45). COM-B proposes  
39 three criteria essential for a behaviour to occur: capacity, opportunity and motivation (46).  
40 The subcategories of these criteria can be linked to the TDF domains and their associated  
41 barriers or facilitators. The COM-B also proposes nine intervention functions assigned to  
42 TDF domains that can prompt behaviour change: education, persuasion, incentivisation,  
43 coercion, training, restriction, environmental restructuring, modelling and enablement  
44 (31, 45, 47). Recommendations were made by identifying which of these intervention  
45 functions matched our results and then selecting relevant function-associated behaviour  
46 change techniques (45).  
47  
48  
49  
50  
51  
52  
53  
54  
55  
56  
57  
58  
59  
60

## RESULTS

### Recruitment and participant characteristics

We offered the 12 CPD courses (i.e. six intervention/control pairs) in each of three Canadian provinces: Quebec, Ontario and New Brunswick. Four pairs of courses were held in Quebec (two in Montreal, October 10<sup>th</sup> 2018 and October 30<sup>th</sup> 2019, and two in Quebec City, October 17<sup>th</sup> 2019 and January 29<sup>th</sup> 2019), one in Ontario (Ottawa, November 8<sup>th</sup> 2019) and one in New-Brunswick (Moncton, October 4<sup>th</sup> 2019).

**Figure 1** illustrates the flow of participants. The participation rate (ratio of users who participated in the study to those who took the training) was 71% (127/178). Forty-nine of 92 questionnaires were analysed from the intervention groups and 78 of 86 from the control groups. Most participants were under 44 years old (n=80, 63%), women (n=101, 79.5%), practised in French (n=86, 67.7%), in Quebec (n=85, 66.9%) and in an urban setting (n=100, 78.8%) (**Table 1**).

**Table 1:** Sociodemographic characteristics of the participants in intervention and control groups

|                            | TOTAL      | Intervention Group | Control Group |
|----------------------------|------------|--------------------|---------------|
| <b>No. of Participants</b> | 127        | 49                 | 78            |
| <b>Age (years)*</b>        |            |                    |               |
| <44                        | 80 (63.0)  | 28 (57.1)          | 52 (66.7)     |
| ≥ 45                       | 42 (33.1)  | 19 (38.8)          | 23 (29.5)     |
| Missing data               | 5 (3.9)    | 2 (4.1)            | 3 (3.8)       |
| <b>Gender*</b>             |            |                    |               |
| Women                      | 101 (79.5) | 40 (81.6)          | 61 (78.2)     |

|                              |            |           |           |
|------------------------------|------------|-----------|-----------|
| Men                          | 19 (15.0)  | 7 (14.3)  | 12 (15.4) |
| Missing data                 | 7 (5.5)    | 2 (4.1)   | 5 (6.4)   |
| <b>Language of practice*</b> |            |           |           |
| French                       | 86 (67.7)  | 32 (65.2) | 54 (69.2) |
| Other                        | 36 (28.3)  | 15 (30.6) | 21 (26.9) |
| Missing data                 | 5 (4.0)    | 2 (4.1)   | 3 (3.9)   |
| <b>Province of practice</b>  |            |           |           |
| Quebec                       | 85 (66.9)  | 31 (63.2) | 54 (69.3) |
| Ontario                      | 18 (14.2)  | 9 (18.4)  | 9 (11.5)  |
| New Brunswick                | 16 (12.6)  | 7 (14.3)  | 9 (11.5)  |
| Missing data                 | 8 (6.3)    | 2 (4.1)   | 6 (7.7)   |
| <b>Practice environment*</b> |            |           |           |
| Urban                        | 100 (78.8) | 39 (79.6) | 61 (78.2) |
| Rural                        | 14 (11.0)  | 4 (8.2)   | 10 (12.8) |
| Missing data                 | 13 (10.2)  | 6 (12.2)  | 7 (9.0)   |

---

\*n(%)

## Quantitative results

### *Feasibility*

We recruited a total of 127 participants, a 41% increase from our target of 90 participants. Collaborators and executive committee members remained involved throughout the project. We held monthly executive committee meetings as planned. Our CPD trainings were held in the three provinces as planned. We gave 12 courses instead of the six initially planned, as additional organizations in Quebec City (n=1) and Montreal (n=2) showed

interest. Due to time constraints imposed by CME settings, completing 1.5 hours (45-min course, 15-min evaluation and 30-min discussion) in all settings was not possible, therefore we held the group discussions in only two out of the six settings (Montreal and Ottawa).

### ***Behavioural Intention***

The intervention aims to influence behaviour by modifying intention and its psychosocial determinants. For example, the intervention could change beliefs about capabilities (or confidence), by increasing health professionals' knowledge about the desired behavior. **Table 2** shows scores for intention and its psychosocial determinants for intervention and control groups as evaluated using the CPD-Reaction questionnaire. Mean difference between intervention and control scores for the four psychosocial determinants of behaviour change influencing intention were: MD=0.16 for social influence (95% CI: -0.26, 0.58), MD=0.63 for belief about capabilities (95% CI: 0.21, 1.06), MD=0.25 for moral norm (95% CI: -0.21, 0.72) and MD=0.22 for belief about consequences (95% CI: -0.23, 0.67). The mean intention score for including sex and gender considerations in patient care was higher in the intervention than in the control group, i.e. 5.65 ( $\pm$  0.19) versus 5.19 ( $\pm$ 0.15), on a scale from 1 (low) to 7 (high). The mean difference between the two groups was -0.47 (95% CI: -0.95, 0.01), with a p-value of 0.06 (**Supplementary table 1**). No statistically significant differences were observed for the remaining four psychosocial determinants. Bivariate analysis showed that the higher median for intention was significantly associated with age over 45 ( $p=0.03$ ) and a rural practice environment ( $p=0.02$ ) (**Supplementary table 1**). After adjusting for age, gender and practice environment, the mean difference in intention between the two groups was statistically significant: -0.57 (95% CI: -1.09, -0.05), with a p-value of 0.03 (**Table 3**).

**Table 2:** CPD-Reaction questionnaire mean scores

|                                                                  | <b>Total</b> | <b>Intervention</b> | <b>Control</b> | <b>Difference<br/>(95% CI)</b> |
|------------------------------------------------------------------|--------------|---------------------|----------------|--------------------------------|
| <b>No. of participants</b>                                       | 127          | 49                  | 78             | -                              |
| <b>Psychosocial<br/>determinants – score<br/>range (1 to 7)*</b> |              |                     |                |                                |

|                            |                      |                      |                      |                       |
|----------------------------|----------------------|----------------------|----------------------|-----------------------|
| Social influence           | 4.62 (4.42;<br>4.83) | 4.72 (4.44;<br>5.00) | 4.56 (4.27;<br>4.85) | 0.16 (-0.26;<br>0.58) |
| Beliefs about capabilities | 5.1 (4.90;<br>5.33)  | 5.50 (5.27;<br>5.74) | 4.87 (4.56;<br>5.17) | 0.63 (0.21;<br>1.06)  |
| Moral norm                 | 5.90 (5.69;<br>6.13) | 6.06 (5.80;<br>6.32) | 5.81 (5.48;<br>6.14) | 0.25 (-0.21;<br>0.72) |
| Beliefs about consequences | 5.68 (5.46;<br>5.90) | 5.82 (5.52;<br>6.11) | 5.60 (5.28;<br>5.91) | 0.22 (-0.23;<br>0.67) |
| <b>Intention*</b>          | 5.37 (5.13;<br>5.60) | 5.65 (5.36;<br>5.95) | 5.19 (4.85;<br>5.52) | 0.47 (-0.01;<br>0.95) |

\*Mean (95% CI) ;

**Table 3:** Mean difference of the intention score between intervention and control groups

|              | Model 1*              |              | Model 2†                   |              | Model 3‡                   |              |
|--------------|-----------------------|--------------|----------------------------|--------------|----------------------------|--------------|
|              | $\beta$ (95% CI)      | P Value      | $\beta$ (95% CI)           | P Value      | $\beta$ (95% IC)           | P Value      |
| Control      | Reference             |              | Reference                  |              | Reference                  |              |
| Intervention | -0.47<br>(-0.95;0.01) | <b>0.057</b> | -0.61<br>(-1.10;-<br>0.12) | <b>0.015</b> | -0.57<br>(-1.09;-<br>0.05) | <b>0.031</b> |

95% CI, confidence interval at 95%;

\*Non-adjusted;

†Adjusted for age and gender;

‡Adjusted for age, gender and environment of practice.

### Qualitative findings

Due to time constraints imposed by CME settings, we held the group discussions in two out of the six settings, Montreal, October 30<sup>th</sup> 2019 and Ottawa, November 8<sup>th</sup> 2019. Thus four semi-structured group discussions (GD1, GD2, GD3, GD4) were conducted and 67 health professionals participated, reporting a variety of barriers and facilitators (**Table 4**).

**Table 4:** Mapping facilitators and barriers to the Theoretical Domains Framework (TDF) with illustrative quotes and frequencies

| TDF DOMAIN                        | FACILITATOR/<br>BARRIER                                                                                     | ILLUSTRATIVE QUOTES*                                                                                                                                                                                                                                                                                                                                                                   | FREQUENCIES** (N=4 groups) |
|-----------------------------------|-------------------------------------------------------------------------------------------------------------|----------------------------------------------------------------------------------------------------------------------------------------------------------------------------------------------------------------------------------------------------------------------------------------------------------------------------------------------------------------------------------------|----------------------------|
| <b>Skills</b>                     | The health professional acknowledges different treatment methods by gender (Facilitator)                    | “Dominique, is that a man or a woman? ... Because they are probably not treated the same” (GD4)                                                                                                                                                                                                                                                                                        | 4                          |
|                                   | The health professional acknowledges different clinical representation by gender (Facilitator)              | “... I work as a nurse in cardiac and pulmonary rehabilitation, and ... it is a fact, that women come less [to rehabilitation programs] in general than men. Women often will quit [rehabilitation] or they won't come because they're taking care of everyone. But something happens [illness] and then they don't have time to take care of themselves, because it's too much” (GD3) | 1                          |
|                                   | The health professional assumed the gender of the patient when analyzing a clinical vignette (Barrier)      | “I assumed that it was a guy” (GD3) / “I presumed that it was a girl” (GD4)                                                                                                                                                                                                                                                                                                            | 3                          |
| <b>Beliefs about Capabilities</b> | The health professional feels he/she can accurately observe the phenotype of the patient (Facilitator)      | “At the first contact we have with a patient ... we see the phenotype there without talking about gender, it's one of the things that jumps out at you when you're taking notes.” (GD3)                                                                                                                                                                                                | 3                          |
| <b>Social influences</b>          | The health professionals assume the patient's gender based on his/her societal role (Barrier)               | “I heard ‘civil servant’, I don't know, in my head I was like ‘civil servant’, so it's a man.” (GD4)                                                                                                                                                                                                                                                                                   | 3                          |
| <b>Knowledge</b>                  | The health professional knows the differences between sex and gender in scientific literature (Facilitator) | “Yes, that's it actually, the biological aspect you certainly take into account in the study, but we are talking about the [social] categories of sex and gender... And menopause, and on the other hand [there's] also andropause” (GD2)                                                                                                                                              | 2                          |
|                                   | The health professional did not                                                                             | “Well, I don't know why we didn't note it                                                                                                                                                                                                                                                                                                                                              | 2                          |

|    |                      |                        |                                                             |
|----|----------------------|------------------------|-------------------------------------------------------------|
| 1  |                      |                        |                                                             |
| 2  |                      |                        |                                                             |
| 3  |                      | ask the gender of the  | [the gender of the patient], I don't have the               |
| 4  |                      | patient when           | answer to that. But ... when we talk about the              |
| 5  |                      | analyzing a clinical   | clinical context it is systemically noted in the            |
| 6  |                      | vignette (Barrier)     | first ... sentence, in the first two words [of              |
| 7  |                      |                        | notes documenting a consultation]. It's hard                |
| 8  |                      |                        | to say that we ignore it [gender of the patient].           |
| 9  |                      |                        | We didn't notice it here, but in clinical                   |
| 10 |                      |                        | practice, have you ever met a patient without               |
| 11 |                      |                        | identifying their gender?" (GD3)                            |
| 12 |                      |                        | 1                                                           |
| 13 |                      |                        |                                                             |
| 14 |                      | The health             |                                                             |
| 15 |                      | professional is not    | "...but in the seminar, there was no emphasis               |
| 16 |                      | aware of the concepts  | on that, so it didn't jump out at us," (GD3)                |
| 17 |                      | of sex and gender      |                                                             |
| 18 |                      | when analyzing a       |                                                             |
| 19 |                      | clinical vignette      |                                                             |
| 20 |                      | (Barrier)              |                                                             |
| 21 |                      |                        |                                                             |
| 22 |                      |                        |                                                             |
| 23 | <b>Beliefs about</b> | The health             | "I would say that I didn't see the need to know             |
| 24 | <b>Consequences</b>  | professional           | if it was a man or a woman...I never asked                  |
| 25 |                      | mentions that they     | myself the question..." (GD1)                               |
| 26 |                      | would not change       |                                                             |
| 27 |                      | their therapeutic      |                                                             |
| 28 |                      | approach according     |                                                             |
| 29 |                      | to the patient's       |                                                             |
| 30 |                      | gender (Barrier)       |                                                             |
| 31 |                      |                        |                                                             |
| 32 | <b>Environment</b>   | The patient's sex is   | "... in the clinical context it's [the sex of the           |
| 33 | <b>al Context</b>    | routinely recorded in  | patient] systematically noted in the first lines            |
| 34 | <b>and</b>           | medical notes          | in every consultation. In the first sentence, in            |
| 35 | <b>Resources</b>     | (Facilitator)          | the first two words. It's hard to say that we               |
| 36 |                      |                        | ignore it." (GD3)                                           |
| 37 |                      |                        |                                                             |
| 38 |                      | The androcentric       | "In French everything is masculine until you                |
| 39 |                      | nature of the French   | know, like in the room here [mostly women                   |
| 40 |                      | language (the use of   | participants] we'll say like "ils ont fait ça" [ <i>ils</i> |
| 41 |                      | masculine generic      | is a masculine pronoun] because you are the                 |
| 42 |                      | language to refer to   | only men, but..." [generalizing to the                      |
| 43 |                      | men and women, as      | masculine pronoun] (GD3) / "The language                    |
| 44 |                      | well as other gender   | doesn't help ... [to differentiate between men              |
| 45 |                      | representation)        | and women]." (GD3)                                          |
| 46 |                      | (Barrier)              |                                                             |
| 47 |                      |                        |                                                             |
| 48 |                      | The healthcare         | "Well it's about when you say 'our diabetes'                |
| 49 |                      | professional           | and 'your depression', if it had been a woman               |
| 50 |                      | perceives that the     | would we have said the same thing?... 'your                 |
| 51 |                      | language used by       | depression' 'our diabetes'..." (GD2)                        |
| 52 |                      | physicians towards a   | [referring to the bias in the language to                   |
| 53 |                      | patient may be         | describe 'your' depression versus 'our'                     |
| 54 |                      | different according to | diabetes]                                                   |
| 55 |                      | sex and gender         |                                                             |
| 56 |                      |                        |                                                             |
| 57 |                      |                        |                                                             |
| 58 |                      |                        |                                                             |
| 59 |                      |                        |                                                             |
| 60 |                      |                        |                                                             |

|                                                 |                                                                                                                                               |                                                                                                                                                                                                              |   |
|-------------------------------------------------|-----------------------------------------------------------------------------------------------------------------------------------------------|--------------------------------------------------------------------------------------------------------------------------------------------------------------------------------------------------------------|---|
|                                                 | (Barrier)                                                                                                                                     |                                                                                                                                                                                                              |   |
| <b>Social/Professional Role and Identity</b>    | The health professional reflects positively on his/her relationship with the patient (Facilitator)                                            | “I work in an exclusively white environment, and I am the only black person, and I have no problem whether [the patient] is male, female or a child” (GD3)                                                   | 1 |
| <b>Intentions</b>                               | The health professional has the intention to change his/her therapeutic approach by considering the differences of gender (Facilitator)       | “With the information that I have here [clinical description of vignette], if I had ‘menopausal woman’, then I think I would have researched more, but with what I had here, I didn’t [see the need].” (GD4) | 1 |
|                                                 | The health professional does not have the intention to change his/her therapeutic approach by considering the differences of gender (Barrier) | “With what I have here [descriptive information of the clinical vignette], I am not sure to what extent I would have changed my approach” (GD4)                                                              | 1 |
| <b>Goals</b>                                    | The health professional does not perceive the integration of the concepts of sex and gender in clinical practice as a priority (Barrier)      | “It wasn’t important ... the most important, [but] that doesn’t mean that [the lack of sex and gender consideration in the clinical vignette] wasn’t perceived” (GD4)                                        | 1 |
| <b>Memory, Attention and Decision Processes</b> | The health professional does not consider that sex and gender are necessary parts of the decision-making process (Barrier)                    | “If it is not obvious, we are not inclined to do it... [take into consideration the sex and gender of the patient]” (GD2)                                                                                    | 1 |

\*Free translation from French

\*\*The number of times that the barrier/facilitator appeared in the transcript

### ***Barriers and facilitators mapped to the TDF domains***

Ten barriers mapped to nine of the 14 TDF domains and seven facilitators mapped onto six of the domains. The most frequent barriers were related to Skills (e.g. failing to consider a patient’s gender) (n=3) and to Social Influence (e.g. making gender assumptions about



1  
2  
3 employment) (n=3). The most frequent facilitators were also related to Skills (n=4) (**Table**  
4  
5 **4**).

6  
7 We mapped to the Skills domain when the participants asked whether their patient was a  
8 woman or man before analyzing the clinical vignette, or else failed to ask the question (the  
9 fictive name of the patient – Dominique – was strategically ambiguous). Thus, failure to  
10 ask was coded as a barrier, and asking was coded as a facilitator. Discussion about  
11 information on sex and/or gender was coded as a facilitator in the Knowledge domain, but  
12 reporting differentiating between women and men patients in clinical practice was coded  
13 as a facilitator in the Skills domain. When participants reported not needing to know the  
14 patient's gender because this information would not have changed their intervention, we  
15 mapped the barrier to Beliefs about consequences domain. Participants documented some  
16 differences between men and women patients in their clinical practice, demonstrating  
17 ability acquired through practice to include sex and gender considerations. Participants also  
18 reported they did not ask the sex of the patient in the clinical vignette as they automatically  
19 observe a patient's sex in practice, so didn't feel the need to mention it in this context. This  
20 facilitator was mapped to the domain beliefs about capabilities (n=3). Some participants  
21 reported that they routinely observe and record a patient's sex when taking notes. This  
22 facilitator was mapped to the domain environmental context and resources, since it this is  
23 an institutional practice reflecting an organisational clinical culture, and could foster  
24 further awareness and consideration of sex and gender (**Table 4**).

### 38 39 **Triangulation**

40  
41 CPD-Reaction psychosocial variables matched barriers that mapped onto to the TDF  
42 domains beliefs about consequences, social influence and intentions. CPD-Reaction  
43 psychosocial variables also matched facilitators that mapped onto to the TDF domains  
44 beliefs about capabilities and intentions. We identified six additional psychosocial  
45 variables from the TDF: knowledge, skills, goal, memory, attention and decision processes,  
46 environmental context and resources, social/professional role and identity. Results of  
47 triangulation were summarised with consequent recommendations (**Supplementary table**  
48 **2**). Recommendations for improving the CPD training were based on behaviour change  
49 techniques associated with the following functions: modelling, training, environmental  
50  
51  
52  
53  
54  
55  
56  
57

1  
2  
3 restructuring, enablement, education and goal settings (**Supplementary table 2**) (45).  
4 Training (n=5) and education (n=4) were the most frequent functions used in the  
5 recommendations.  
6  
7

## 8 9 **DISCUSSION**

10  
11 We assessed the feasibility and impact of including sex and gender considerations in a CPD  
12 course on T2D and depression care on health professionals' intention to include sex and  
13 gender considerations in patient care. Recruited CPD organisations, collaborators and  
14 patient-partners stayed engaged throughout the study. All planned activities occurred and  
15 71% of targeted health professionals participated. The intention to include sex and gender  
16 considerations in patient care was higher in the intervention group, and statistically  
17 significant when controlling for age, gender, and practice sites. Barriers were mostly  
18 related to skills and social influence and facilitators to skills and beliefs about capabilities.  
19 We triangulated results and produced recommendations for improving the CPD course.  
20 The following observations could enable CPD organisations to systematically improve  
21 CPD by integrating sex and gender considerations into their existing material.  
22  
23  
24  
25  
26  
27  
28  
29  
30

31 First, all our predetermined feasibility criteria were met. In fact, due to increased interest  
32 in the topic, we recruited more participants and gave more CPD activities than planned.  
33 Recruitment may also have improved because we involved stakeholders early on in the  
34 research process, including in applying for the grant. Early engagement of stakeholders has  
35 been associated elsewhere with more successful recruitment (48). Therefore, elements that  
36 should be considered when designing similar CPD activities include, but are not limited to:  
37 1) successful collaboration and co-creation with CPD organisations early on including  
38 during grant writing, 2) offering CME accreditation for the CPD activities, 3) the duration  
39 of the training, and 4) the evidence base relevant to the clinical topic (49).  
40  
41  
42  
43  
44  
45  
46

47 Second, the CPD course that included sex and gender considerations increased health  
48 professionals' intention to include sex and gender considerations in patients' care. This  
49 may suggest a significant knowledge gap among participants. Studies show that health  
50 professionals lack knowledge of sex and gender differences in disease manifestation and  
51 outcomes and fail to recognize the gender constraints that their patients face (50-53). For  
52 example, in a cross-sectional survey of physicians (71% male), 55% said that the medical  
53  
54  
55  
56  
57  
58  
59  
60

1  
2  
3 curriculum did not adequately prepare them for dealing with sexual health problems,  
4 particularly those of female patients (50). In another study, only 49% of primary care  
5 physicians (n=200, 65% male) and 59% of cardiologists (n=100, 85% male) reported that  
6 their training prepared them to assess female patients' cardiovascular risk (52). Our study  
7 represents a promising avenue for rectifying these gaps. Furthermore, bivariate analyses of  
8 the between-group difference in the intention scores yielded significant results in older, but  
9 not younger, participants and in those practising in rural area. Their age and geographical  
10 isolation perhaps reduced their exposure to sex and gender issues, which have only been  
11 included in medical curricula since they qualified (53). They may also have less access to  
12 CPD training due to isolation, poor technological resources, low financial support (54, 55)  
13 and geographical variations in medical practice styles (56, 57). Future studies could further  
14 investigate the perceptions of health professionals in rural settings on age and gender. They  
15 could also document if patients experience geographical differences in care regarding sex  
16 and gender. Training could target older and rural health professionals, who seemed more  
17 open to modifying their clinical practice.  
18  
19  
20  
21  
22  
23  
24  
25  
26  
27  
28

29  
30 Third, beliefs about capabilities as a facilitator showed the strongest mean difference  
31 between the intervention and control groups. These results are consistent with a literature  
32 review of 277 studies showing that the mechanisms of action most frequently associated  
33 with behaviour change techniques are beliefs about capabilities and intention (58). Adding  
34 a practical component to the CPD course could strengthen beliefs about capabilities. Also,  
35 several barriers and facilitators to considering sex and gender in patient care were  
36 identified. Our qualitative analysis showed that participants did not consider integrating  
37 sex and gender into clinical practice as a priority, with social influences emerging as an  
38 important barrier. The social influence score as measured by CPD-Reaction also showed  
39 the lowest impact (MD=0.16), suggesting that the training did not address this factor (Table  
40 2). A CPD course could offer a reflective segment on how social influence could be  
41 affecting their clinical practice (57, 59). Furthermore, belief about consequences had one  
42 of the lowest MD (0.22) of the five psychosocial determinants, and one associated barrier  
43 (n=2). This could be remedied by focusing more on the consequences of not integrating  
44 sex and gender into clinical practice (51).  
45  
46  
47  
48  
49  
50  
51  
52  
53  
54  
55  
56  
57  
58  
59  
60

1  
2  
3 Finally, in spite of the low priority given to sex and gender by our participants, qualitative  
4 analysis demonstrated that opportunities already exist for integrating these considerations  
5 into practice, such as the routine documenting of the patient's sex. CPD strategies could  
6 make more of these opportunities (60). For example, CPD activities could advocate for  
7 sex- and gender-equitable care when treating men and women for diabetes and depression.  
8 Indeed, specific attention could be given to diabetic foot care when treating men, while  
9 specific attention could be given to blood-glucose regulation and to family and lifestyle  
10 issues when treating women (7, 61).  
11  
12  
13  
14  
15  
16  
17

18 This intervention could be adapted to medical fields other than T2D and depression, and to  
19 other countries and areas outside French-speaking provinces of Canada. While many of the  
20 barriers participants mentioned were culture- and language-specific to the Quebec or  
21 francophone context, many other languages (e.g. Spanish, German, Italian, and  
22 Portuguese) also generalise everything to the masculine gender, suggesting shared  
23 linguistic barriers. However, each culture has highly specific sex and gender norms  
24 affecting physicians' clinical assumptions (62). Our qualitative results highlight the fact  
25 that CPD on sex and gender considerations must be tailored to specific cultural contexts  
26 (17) and incorporate sex- and gender-based analysis tools (63).  
27  
28  
29  
30  
31  
32  
33

34 Our study has a few limitations. As we used a single post-intervention measure, we cannot  
35 attribute the difference between the two groups solely to the intervention. However, our  
36 analysis suggests that those who completed the intervention increased their intention, as  
37 well as increasing all four psychosocial predictors, suggesting an association with the  
38 intervention. Second, the fact that participants could choose which course to attend  
39 (according to conference guidelines), and hence the non-randomized nature of the study,  
40 may have biased our feasibility findings. Also, the training was given by teachers of  
41 different genders for the intervention and control groups (a woman in the intervention  
42 group and a man in the control group). As a bias could have been introduced owing to  
43 differences in communication styles between men and women, the teaching teams  
44 practised the courses several times to ensure that teaching methods were equivalent. In  
45 addition, we ensured the teachers stayed with their respective groups for the six data  
46 collections. Also, due to ethics guidelines, we only analysed questionnaires completed by  
47  
48  
49  
50  
51  
52  
53  
54  
55  
56  
57  
58  
59  
60

1  
2  
3 participants who had also signed consent forms. Although the human resources for both  
4 groups were the same (trainer, research-assistant and patient-partners), the control group  
5 had an extra team member, resulting in unequal numbers of participants who signed  
6 consent in each group. The presence of this extra member could also explain the difference  
7 in the number of questionnaires collected in the two groups.  
8  
9

10  
11  
12 While there is evidence that intention is an effective determinant for measuring behaviour  
13 change (39), it is limited as a proxy. Finding other reliable measures of behaviour change  
14 is challenging (64). However, identifying barriers and facilitators to change is a first step  
15 (64). Semi-structured group discussions using a clinical vignette have also been shown to  
16 contribute to clinical behaviour change (64). Methods such as audit and feedback, as well  
17 as “commitment to change statements” could reduce the intention-behaviour gap and  
18 strengthen the understanding of clinical changes following CPD activities (65, 66).  
19  
20

21  
22  
23 Lastly, our discussion groups attracted many participants, limiting both participants’  
24 opportunity to speak and the depth of the discussion. Our mixed-methods approach is a  
25 strength of this study and our findings support the feasibility of a randomised trial informed  
26 by identified barriers and facilitators.  
27  
28  
29  
30  
31

## 32 33 **CONCLUSION**

34  
35 A CPD course with sex and gender considerations is feasible and well received by health  
36 professionals. The significant between-group difference in the intention scores suggests the  
37 intervention had a favorable impact on health professionals’ intention to include sex and  
38 gender considerations when caring for their patients with T2D and depression. However,  
39 caution is required as this effect may be attributed to other sources given the non-  
40 randomised nature of our study. Future randomised controlled trials are needed to control  
41 for potential selection biases and confirm our results, accounting for barriers and  
42 facilitators in sex- and gender-adapted diabetes and depression care. Our findings will  
43 inform future CPD initiatives that address this and other inequities in health care pertaining  
44 to sex and gender.  
45  
46  
47  
48  
49  
50  
51  
52  
53

## 54 55 **Acknowledgements**

1  
2  
3 We thank the members of the mATrICES-F Group for their involvement in this project.  
4 We also thank Louisa Blair for editing this manuscript.  
5  
6

7 **Collaborators mATrICES-F Group:**  
8

9 Alèxe Deom Tardif, Université Laval  
10

11 Amédé Gogovor, Université Laval  
12

13 André Bilodeau, McGill University  
14

15 André Bussièrès, McGill University  
16

17 André Gaudreau, Patient-partner  
18

19 Audrey Ferron Parayre, University of Ottawa  
20

21 Caroline Jose, Université de Moncton  
22

23 Danièle Remy-Lamarche, Patient-partner  
24

25 Dawn Stacey, University of Ottawa  
26

27 Denis Audet, University Family Medicine Group Saint-François-d'Assise  
28

29 Denis Prud'homme, Université de Moncton  
30

31 France Légaré, Université Laval  
32

33 Francine Borduas, Médecins francophones du Canada  
34

35 Gerard Ngueta, VITAM – Centre de recherche en santé durable  
36

37 Geneviève Roch, Université Laval  
38

39 Hélène Lee-Gosselin, Université Laval  
40

41 Isabelle Auclair, Université Laval  
42

43 Laurie Laplanche, Université Laval  
44

45 Luc Vigneault, Patient-partner  
46

47 Maman Joyce Dogba, Université Laval  
48  
49  
50  
51  
52  
53  
54  
55  
56  
57  
58  
59  
60

1  
2  
3 Marie-Claude Tremblay, Université Laval  
4

5 Marie-Pierre Gagnon, Université Laval  
6

7  
8 Nicole Parent, Médecins francophones du Canada  
9

10 Sabrina Guay-Bélanger, VITAM – Centre de recherche en santé durable  
11

12 Sophie Desroches, Université Laval  
13

14 Valérie Borde, Centre DECLIC  
15

### 16 17 **Contributors** 18

19  
20 ADT, AGo, SGB, FL, NP and AB conceived and designed the study. ADT, AGo, SGB,  
21 DA, AGa, DRL, LV and FL participated to data collection. ADT, AGo, SGB, GN and FL  
22 participated to data analysis. All authors critically revised the interpretation of data. ADT,  
23 AGo, SGB and FL drafted the manuscript. All authors and members of the mATrICES-  
24 F Group read, provided feedback and approved the final manuscript.  
25  
26  
27  
28

### 29 **Funding** 30

31  
32 This work was supported by the Canadian Institutes of Health Research, grant number  
33 201702IGK-384530-IGK-CFBA-19158. AGo is funded by a CIHR Patient-Oriented  
34 Research fellowship. FL holds a Tier 1 Canada Research Chair in Shared Decision Making  
35 and Knowledge Translation.  
36  
37  
38

### 39 **Disclaimer** 40

41 The findings and views are those of the authors.  
42  
43

### 44 **Competing interests** 45

46 None declared.  
47  
48

### 49 **Patient consent for publication** 50

51 Not applicable.  
52  
53

### 54 **Ethics approval** 55 56 57 58 59 60



Centre intégré universitaire de santé et de services sociaux de la Capitale-Nationale (CIUSSS-CN) Ethics Board (2017-2018-16 MP), the Hôpital Montfort Research ethics board (19-20-05-009), Vitalité health network research ethics board (CER-2019-18).

### **Provenance and peer review**

Not commissioned; externally peer reviewed.

### **Patient consent for publication**

Not required.

### **Data sharing statement**

Data are available upon reasonable request.

### **References**

1. Clayton JA, Tannenbaum C. Reporting Sex, Gender, or Both in Clinical Research? *JAMA*. 2016;316(18):1863.
2. Institut de recherche en santé du Canada. Comment intégrer le sexe et le genre à la recherche 2019 [Available from: <http://cihr-irsc.gc.ca/f/50836.html>].
3. Johnson JL, Greaves L, Repta R. Better science with sex and gender: Facilitating the use of a sex and gender-based analysis in health research. *International Journal for Equity in Health*. 2009;8(1):14.
4. Oliffe J, Greaves L. *Designing and Conducting Gender, Sex, and Health Research*. Thousand Oaks, California 2012. Available from: <http://sk.sagepub.com/books/designing-and-conducting-gender-sex-and-health-research>.
5. Légaré F, Lee-Gosselin H, Borduas F, Monette C, Bilodeau A, Tanguay D, et al. Approaches to considering sex and gender in continuous professional development for health and social care professionals: An emerging paradigm. *Medical Teacher*. 2018;40(9):875-9.
6. Tannenbaum C, Ellis RP, Eyssel F, Zou J, Schiebinger L. Sex and gender analysis improves science and engineering. *Nature*. 2019;575(7781):137-46.
7. Kautzky-Willer A, Harreiter J, Pacini G. Sex and Gender Differences in Risk, Pathophysiology and Complications of Type 2 Diabetes Mellitus. *Endocrine Reviews*. 2016;37(3):278-316.
8. Geary N. Counterpoint: physiologists should not distinguish “sex” and “gender”. *American Journal of Physiology-Regulatory, Integrative and Comparative Physiology*. 2010;298(6):R1702-R4.



- 1  
2  
3 9. Demmer RT, Gelb S, Suglia SF, Keyes KM, Aiello AE, Colombo PC, et al. Sex  
4 Differences in the Association Between Depression, Anxiety, and Type 2 Diabetes  
5 Mellitus. 2015;77(4):467-77.
- 6  
7 10. Kuehner C. Why is depression more common among women than among men?  
8 *Lancet Psychiatry*. 2017;4(2):146-58.
- 9  
10 11. Turecki G, Brent DA. Suicide and suicidal behaviour. *The Lancet*.  
11 2016;387(10024):1227-39.
- 12  
13 12. Zhuang QS, Shen L, Ji HF. Quantitative assessment of the bidirectional  
14 relationships between diabetes and depression. *Oncotarget*. 2017;8(14):23389-400.
- 15  
16 13. Ali S, Stone MA, Peters JL, Davies MJ, Khunti K. The prevalence of co-morbid  
17 depression in adults with Type 2 diabetes: a systematic review and meta-analysis.  
18 *Diabetic Medicine*. 2006;23(11):1165-73.
- 19  
20 14. Ahmad A, Abujbara M, Jaddou H, Younes NA, Ajlouni K. Anxiety and  
21 Depression Among Adult Patients With Diabetic Foot: Prevalence and Associated  
22 Factors. *Journal of clinical medicine research*. 2018;10(5):411-8.
- 23  
24 15. Toker S, Shirom A, Melamed S. Depression and the metabolic syndrome: gender-  
25 dependent associations. *Depression and anxiety*. 2008;25(8):661-9.
- 26  
27 16. Möller-Leimkühler AM. Gender differences in cardiovascular disease and  
28 comorbid depression. *Dialogues in clinical neuroscience*. 2007;9(1):71-83.
- 29  
30 17. Coen S BE. What a Difference Sex and Gender Make: A gender, Sex and Health  
31 Research Casebook. Vancouver; 2012.
- 32  
33 18. Gilbert-Ouimet M, Trudel X, Aubé K, Ndjaboue R, Duchaine C, Blanchette C, et  
34 al. Differences between women and men in the relationship between psychosocial  
35 stressors at work and work absence due to mental health problem. *Occupational and  
36 Environmental Medicine*. 2020;77(9):603-10.
- 37  
38 19. Deisinger C, Dervic E, Leutner M, Kosi-Trebotic L, Klimek P, Kautzky A, et  
39 al. Diabetes mellitus is associated with a higher risk for major depressive disorder in  
40 women than in men. *BMJ Open Diabetes Research & Care*. 2020;8(1):e001430.
- 41  
42 20. Tannenbaum C, Greaves L, Graham ID. Why sex and gender matter in  
43 implementation research. *BMC Medical Research Methodology*. 2016;16(1).
- 44  
45 21. Tannenbaum C, Clow B, Haworth-Brockman M, Voss P. Sex and gender  
46 considerations in Canadian clinical practice guidelines: a systematic review. *CMAJ  
47 Open*. 2017;5(1):E66-E73.
- 48  
49 22. Ferlie EB, Shortell SM. Improving the quality of health care in the United  
50 Kingdom and the United States: a framework for change. *Milbank Q*. 2001;79(2):281-  
51 315.
- 52  
53 23. Davis D, Evans M, Jadad A, Perrier L, Rath D, Ryan D, et al. The case for  
54 knowledge translation: shortening the journey from evidence to effect. *Bmj*.  
55 2003;327(7405):33-5.
- 56  
57 24. Davis D, Galbraith R. Continuing Medical Education Effect on Practice  
58 Performance. *Chest*. 2009;135(3):42S-8S.
- 59  
60 25. Institute of Medicine. Redesigning Continuing Education in the Health  
Professions. Washington, DC: The National Academies Press; 2010. 296 p.
26. Godin G. Les comportements dans le domaine de la santé : Comprendre pour  
mieux intervenir. Montréal, Québec: Les Presses de l'Université de Montréal 2012.

- 1
- 2
- 3
- 4 27. Ajzen I. The theory of planned behavior. *Organizational Behavior and Human Decision Processes*. 1991;50(2):179-211.
- 5
- 6 28. Légaré F, Borduas F, Freitas A, Turcotte S. User Manual – The Continuing Professional Development (CPD) Reaction Questionnaire. 2015.
- 7
- 8 29. Atkins L, Francis J, Islam R, O'Connor D, Patey A, Ivers N, et al. A guide to using the Theoretical Domains Framework of behaviour change to investigate implementation problems. *Implementation Science*. 2017;12(1).
- 9
- 10 30. Cane J, O'Connor D, Michie S. Validation of the theoretical domains framework for use in behaviour change and implementation research. *Implementation Science*. 2012;7(1):37.
- 11
- 12 31. Michie S, van Stralen MM, West R. The behaviour change wheel: A new method for characterising and designing behaviour change interventions. *Implementation Science*. 2011;6(1):42.
- 13
- 14 32. Eldridge SM, Chan CL, Campbell MJ, Bond CM, Hopewell S, Thabane L, et al. CONSORT 2010 statement: extension to randomised pilot and feasibility trials. *BMJ*. 2016;355:i5239.
- 15
- 16 33. Gogovor A MT, Etherington N, Colantonio A, Légaré F, on behalf of the GIKT Group. Sex and gender analysis in knowledge translation interventions: challenges and solutions. *Health Research Policy and Systems*. 2020;18(1):108.
- 17
- 18 34. Atlantis E, Fahey P, Foster J. Collaborative care for comorbid depression and diabetes: a systematic review and meta-analysis. *BMJ Open*. 2014;4(4):e004706.
- 19
- 20 35. Holt RI, de Groot M, Golden SH. Diabetes and depression. *Curr Diab Rep*. 2014;14(6):491.
- 21
- 22 36. Harreiter J, Fadl H, Kautzky-Willer A, Simmons D. Do Women with Diabetes Need More Intensive Action for Cardiovascular Reduction than Men with Diabetes? *Current diabetes reports*. 2020;20(11):61.
- 23
- 24 37. Légaré F, Freitas A, Turcotte S, Borduas F, Jacques A, Luconi F, et al. Responsiveness of a simple tool for assessing change in behavioral intention after continuing professional development activities. *PLOS ONE*. 2017;12(5):e0176678.
- 25
- 26 38. Légaré F, Borduas F, Freitas A, Jacques A, Godin G, Luconi F, et al. Development of a Simple 12-Item Theory-Based Instrument to Assess the Impact of Continuing Professional Development on Clinical Behavioral Intentions. *PLoS ONE*. 2014;9(3):e91013.
- 27
- 28 39. Godin G, Bélanger-Gravel A, Eccles M, Grimshaw J. Healthcare professionals' intentions and behaviours: A systematic review of studies based on social cognitive theories. *Implementation Science*. 2008;3(1):36.
- 29
- 30 40. Michie S. Making psychological theory useful for implementing evidence based practice: a consensus approach. *Quality and Safety in Health Care*. 2005;14(1):26-33.
- 31
- 32 41. Mickey R M GS. The Impact of Confounder Selection Criteria on Effect Estimation *American Journal of Epidemiology*. 1989;129(1):125-37.
- 33
- 34 42. Budtz-Jørgensen E, Keiding N, Grandjean P, Weihe P. Confounder selection in environmental epidemiology: assessment of health effects of prenatal mercury exposure. *Ann Epidemiol*. 2007;17(1):27-35.
- 35
- 36 43. Atkins L, Francis J, Islam R, O'Connor D, Patey A, Ivers N, et al. A guide to using the Theoretical Domains Framework of behaviour change to investigate implementation problems. *Implement Sci*. 2017;12(1):77.
- 37
- 38
- 39
- 40
- 41
- 42
- 43
- 44
- 45
- 46
- 47
- 48
- 49
- 50
- 51
- 52
- 53
- 54
- 55
- 56
- 57
- 58
- 59
- 60

- 1  
2  
3  
4  
5  
6  
7  
8  
9  
10  
11  
12  
13  
14  
15  
16  
17  
18  
19  
20  
21  
22  
23  
24  
25  
26  
27  
28  
29  
30  
31  
32  
33  
34  
35  
36  
37  
38  
39  
40  
41  
42  
43  
44  
45  
46  
47  
48  
49  
50  
51  
52  
53  
54  
55  
56  
57  
58  
59  
60
44. O'Cathain A, Murphy E, Nicholl J. Three techniques for integrating data in mixed methods studies. *Bmj*. 2010;341:c4587.
  45. Michie S, Atkins L, R. W. The behaviour change wheel : a guide to designing Interventions. Great Britain: Silverback Publishing; 2014.
  46. West R, Michie S. A brief introduction to the COM-B Model of behaviour and the PRIME Theory of motivation. *Qeios*. 2020.
  47. Agbadjé TT, Menear M, Dugas M, Gagnon M-P, Rahimi SA, Robitaille H, et al. Pregnant women's views on how to promote the use of a decision aid for Down syndrome prenatal screening: a theory-informed qualitative study. *BMC Health Services Research*. 2018;18(1).
  48. Garvelink MM, Freitas A, Menear M, Brière N, Stacey D, Légaré F. In for a penny, in for a pound: the effect of pre-engaging healthcare organizations on their subsequent participation in trials. *BMC Research Notes*. 2015;8(1):751.
  49. Little P, Hayes S. Continuing professional development (CPD): GPs' perceptions of post-graduate education-approved (PGEA) meetings and personal professional development plans (PDPs). 2003;20(2):192-8.
  50. Veloshnee G, Loveday P-K. Gender biases and discrimination: a review of health care interpersonal interactions 2007 [Available from: [https://www.who.int/social\\_determinants/resources/gender\\_biases\\_and\\_discrimination\\_wgkn\\_2007.pdf](https://www.who.int/social_determinants/resources/gender_biases_and_discrimination_wgkn_2007.pdf)].
  51. Mauvais-Jarvis F, Bairey Merz N, Barnes PJ, Brinton RD, Carrero J-J, Demeo DL, et al. Sex and gender: modifiers of health, disease, and medicine. *The Lancet*. 2020;396(10250):565-82.
  52. Bairey Merz CN, Andersen H, Sprague E, Burns A, Keida M, Walsh MN, et al. Knowledge, Attitudes, and Beliefs Regarding Cardiovascular Disease in Women: The Women's Heart Alliance. *J Am Coll Cardiol*. 2017;70(2):123-32.
  53. Kling JM, Rose SH, Kransdorf LN, Viggiano TR, Miller VM. Evaluation of sex- and gender-based medicine training in post-graduate medical education: a cross-sectional survey study. *Biology of Sex Differences*. 2016;7(S1).
  54. Curran VR, Fleet L, Kirby F. Factors influencing rural health care professionals' access to continuing professional education. *Aust J Rural Health*. 2006;14(2):51-5.
  55. Berndt A, Murray CM, Kennedy K, Stanley MJ, Gilbert-Hunt S. Effectiveness of distance learning strategies for continuing professional development (CPD) for rural allied health practitioners: a systematic review. *BMC Medical Education*. 2017;17(1).
  56. OCDE. Geographic Variations in Health Care 2014.
  57. Bertakis KD, Helms LJ, Callahan EJ, Azari R, Robbins JA. The influence of gender on physician practice style. *Med Care*. 1995;33(4):407-16.
  58. Carey RN, Connell LE, Johnston M, Rothman AJ, de Bruin M, Kelly MP, et al. Behavior Change Techniques and Their Mechanisms of Action: A Synthesis of Links Described in Published Intervention Literature. *Annals of Behavioral Medicine*. 2018;53(8):693-707.
  59. Etherington N, Rodrigues IB, Giangregorio L, Graham ID, Hoens AM, Kasperavicius D, et al. Applying an intersectionality lens to the theoretical domains framework: a tool for thinking about how intersecting social identities and structures of power influence behaviour. *BMC Medical Research Methodology*. 2020;20(1).

- 1  
2  
3  
4  
5  
6  
7  
8  
9  
10  
11  
12  
13  
14  
15  
16  
17  
18  
19  
20  
21  
22  
23  
24  
25  
26  
27  
28  
29  
30  
31  
32  
33  
34  
35  
36  
37  
38  
39  
40  
41  
42  
43  
44  
45  
46  
47  
48  
49  
50  
51  
52  
53  
54  
55  
56  
57  
58  
59  
60
60. Guly HR. Continuing professional development for doctors in accident and emergency. *Journal of Accident & Emergency Medicine*. 2000;17(1):12-4.
61. Peek ME. Gender differences in diabetes-related lower extremity amputations. *Clinical orthopaedics and related research*. 2011;469(7):1951-5.
62. Weziak-Bialowolska D. Differences in Gender Norms Between Countries: Are They Valid? The Issue of Measurement Invariance. *European journal of population = Revue europeenne de demographie*. 2015;31(1):51-76.
63. Macdermid JC, Graham ID. Knowledge Translation: Putting the “Practice” in Evidence-Based Practice. *Hand Clinics*. 2009;25(1):125-43.
64. Eccles MP, Hrisos S, Francis J, Kaner EF, Dickinson HO, Beyer F, et al. Do self-reported intentions predict clinicians' behaviour: a systematic review. *Implementation Science*. 2006;1(1).
65. Wakefield J, Herbert CP, Maclure M, Dormuth C, Wright JM, Legare J, et al. Commitment to change statements can predict actual change in practice. *The Journal of continuing education in the health professions*. 2003;23(2):81-93.
66. van Braak M, Visser M, Holtrop M, Stadius Muller I, Bont J, van Dijk N. What motivates general practitioners to change practice behaviour? A qualitative study of audit and feedback group sessions in Dutch general practice. *BMJ open*. 2019;9(5):e025286.

Figure 1 Flowchart of participants

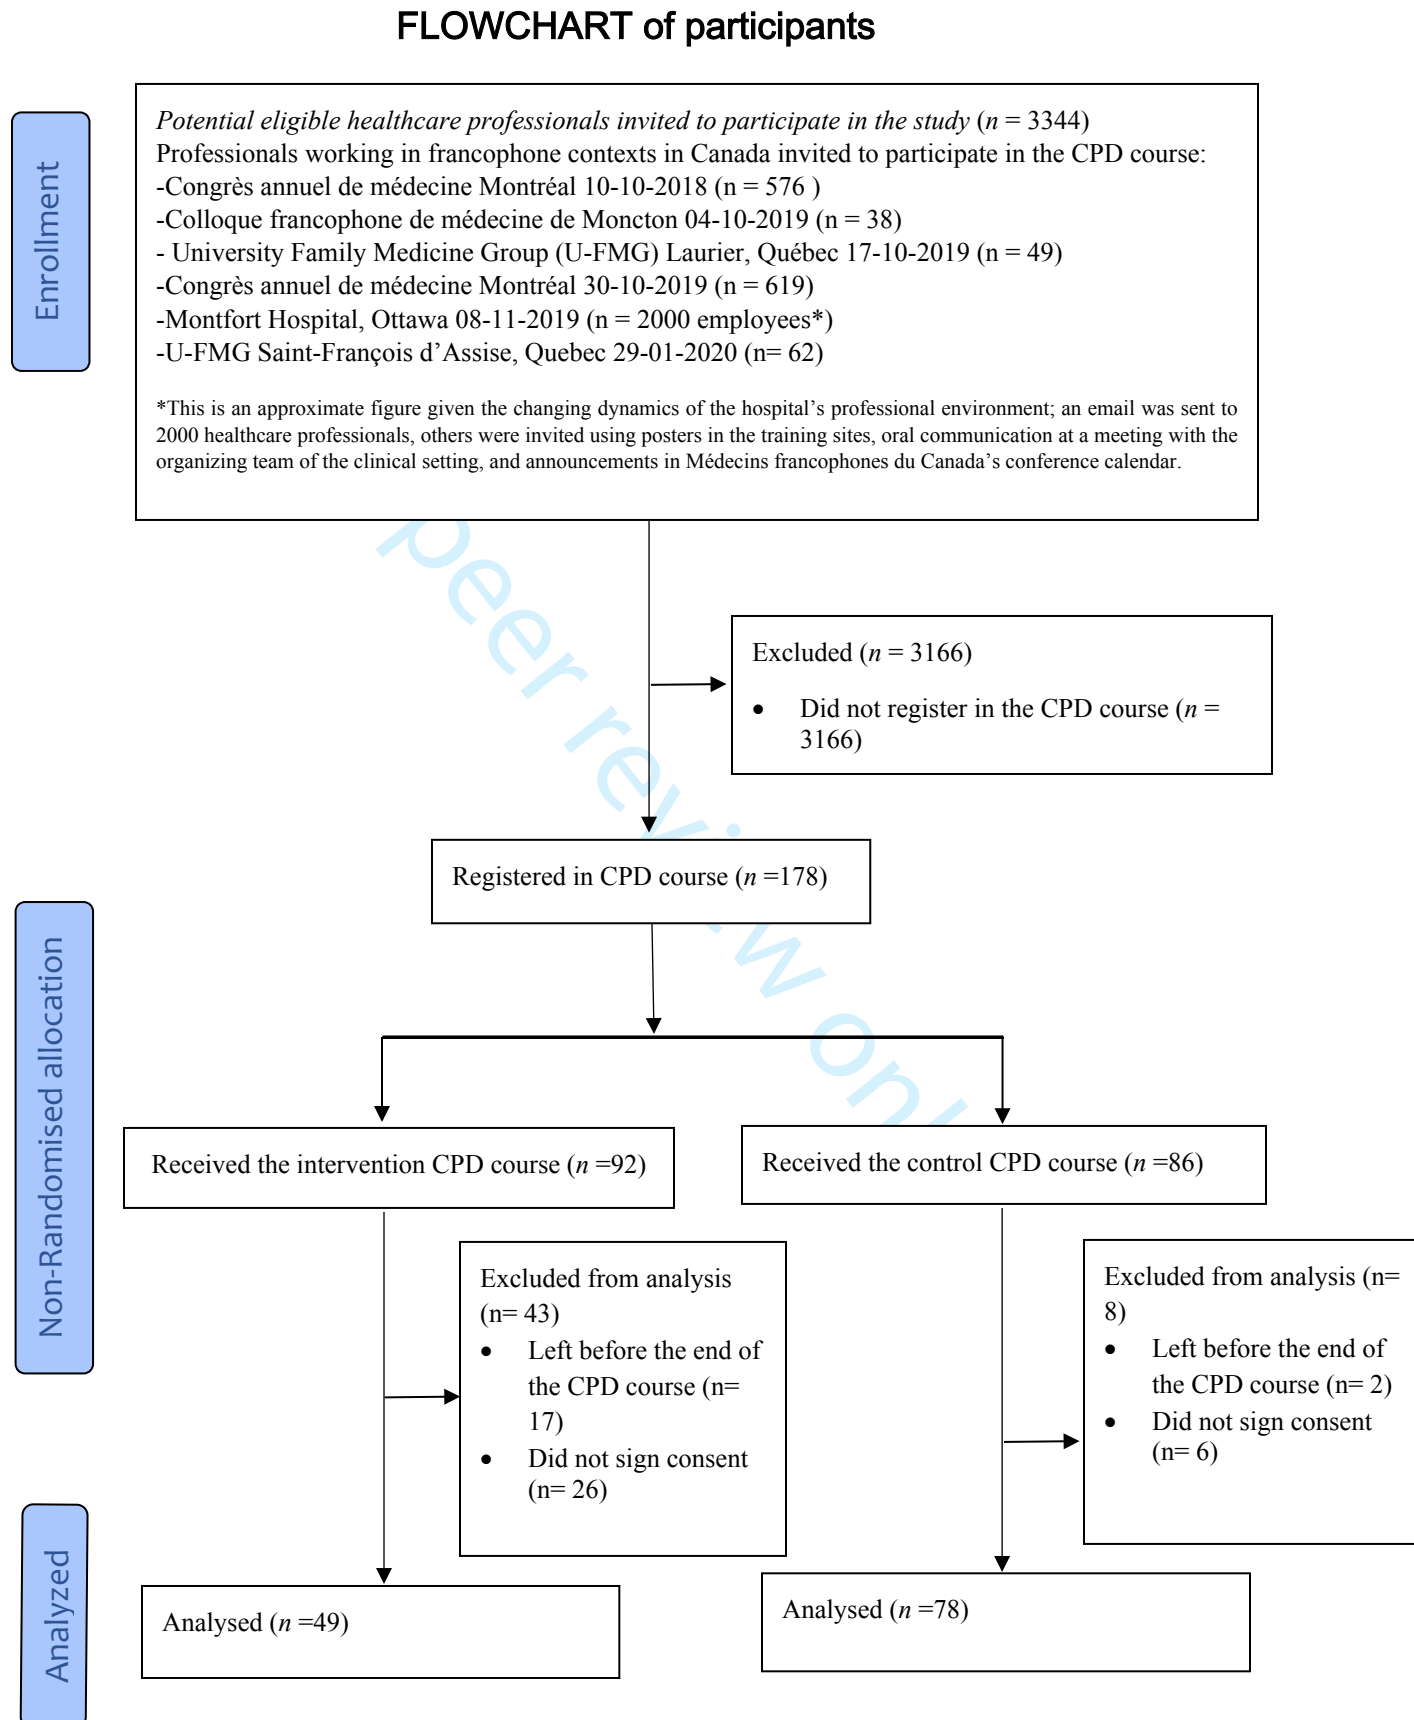

**Supplementary table 1:** Distribution of the scores of intention to include sex and gender considerations in patient care in the clinical context of T2D and depression

|                                | Parametric estimation * |           |                          |                     | Non-parametric estimation <sup>†</sup> |                   |                      |
|--------------------------------|-------------------------|-----------|--------------------------|---------------------|----------------------------------------|-------------------|----------------------|
|                                | Intervention            | Control   | Mean difference (95% CI) | PValue <sup>‡</sup> | Intervention                           | Control           | P Value <sup>£</sup> |
| <b>No. of participants</b>     | 49                      | 78        |                          |                     | 49                                     | 78                |                      |
| <b>Total</b>                   | 5.65±0.19               | 5.19±0.15 | -0.47 (-0.95; 0.01)      | 0.057               | 5.50 (5.00; 6.50)                      | 5.50 (4.50; 6.00) | 0.162                |
| <b>Age (years)</b>             |                         |           |                          |                     |                                        |                   |                      |
| < 44                           | 5.68±0.25               | 5.30±0.18 | -0.38 (-1.00; 0.24)      | 0.226               | 5.50 (5.00; 6.50)                      | 5.50 (5.00; 6.50) | 0.717                |
| ≥ 45                           | 5.92±0.29               | 4.93±0.26 | -0.99 (-1.78; -0.20)     | <b>0.016</b>        | 6.00 (5.00; 6.50)                      | 5.50 (3.50; 6.00) | <b>0.029</b>         |
| <b>Gender</b>                  |                         |           |                          |                     |                                        |                   |                      |
| Men                            | 5.79±0.45               | 4.79±0.34 | -0.99 (-2.19; 0.20)      | 0.098               | 6.00 (5.00; 6.50)                      | 5.25 (3.50; 6.00) | 0.070                |
| Women                          | 5.78±0.21               | 5.24±0.17 | -0.54 (-1.08; 0.00)      | 0.051               | 5.50 (5.00; 6.50)                      | 5.50 (4.50; 6.50) | 0.245                |
| <b>Language</b>                |                         |           |                          |                     |                                        |                   |                      |
| French                         | 5.81±0.20               | 5.35±0.16 | -0.46 (-0.97; 0.05)      | 0.073               | 6.00 (5.00; 6.50)                      | 5.50 (4.50; 6.00) | 0.133                |
| Other                          | 5.70±0.42               | 4.76±0.35 | -0.94 (-2.05; 0.17)      | 0.096               | 5.50 (5.00; 6.50)                      | 5.50 (4.50; 6.00) | 0.346                |
| <b>Province of practice</b>    |                         |           |                          |                     |                                        |                   |                      |
| Quebec                         | 5.85±0.20               | 5.43±0.15 | -0.43 (-0.94; 0.08)      | 0.097               | 6.00 (5.00; 6.50)                      | 5.50 (5.00; 6.50) | 0.144                |
| Ontario                        | 5.83±0.43               | 4.89±0.43 | -0.94 (-2.23; 0.34)      | 0.138               | 6.00 (5.00; 6.50)                      | 5.00 (4.50; 6.00) | 0.223                |
| New Brunswick                  | 5.36±0.73               | 4.00±0.64 | -1.36 (-3.44; 0.72)      | 0.184               | 5.50 (5.00; 5.50)                      | 4.00 (1.00; 6.00) | 0.512                |
| <b>Environment of practice</b> |                         |           |                          |                     |                                        |                   |                      |

|    |       |           |           |          |       |             |        |              |
|----|-------|-----------|-----------|----------|-------|-------------|--------|--------------|
| 1  |       |           |           |          |       |             |        |              |
| 2  |       |           |           |          |       |             |        |              |
| 3  | Urban | 5.74±0.20 | 5.37±0.16 | -0.37 (- | 0.143 | 5.50 (5.00; | 5.50   | 0.486        |
| 4  |       |           |           | 0.88;    |       | 6.50)       | (5.00; |              |
| 5  |       |           |           | 0.13)    |       |             | 6.50)  |              |
| 6  | Rural | 6.38±0.87 | 4.45±0.55 | -1.93 (- | 0.086 | 6.25 (6.00; | 5.25   | <b>0.018</b> |
| 7  |       |           |           | 4.17;    |       | 6.75)       | (3.50; |              |
| 8  |       |           |           | 0.32)    |       |             | 6.00)  |              |
| 9  |       |           |           |          |       |             |        |              |
| 10 |       |           |           |          |       |             |        |              |

\*Mean±standard deviation;

†Median (25<sup>th</sup> percentile; 75<sup>th</sup> percentile);

‡Derived from the general linear models;

‡Derived from the Kruskal-Wallis (Wilcoxon) test

For peer review only



1  
2  
3  
4  
5  
6  
7  
8  
9  
10  
11  
12  
13  
14  
15  
16  
17  
18  
19  
20  
21  
22  
23  
24  
25  
26  
27  
28  
29  
30  
31  
32  
33  
34  
35  
36  
37  
38  
39  
40  
41  
42  
43  
44  
45  
46  
47  
48  
49  
50  
51  
52  
53  
54  
55  
56  
57  
58  
59  
60

**Supplementary table 2:** Recommendations for improving the CPD training, based on barriers and facilitators, using the COM-B model, the Theoretical Domains Framework and the CPD-Reaction questionnaire

| COM-B criteria     | COM-B criteria subcategory | TDF domains linked to COM-B         | Barriers and facilitators perceived by health professionals to including sex and gender considerations in their clinical practice                                   | Psychosocial determinants of the CPD-Reaction questionnaire | Recommendations (COM-B Intervention function)                                                                                                                                                                                                                      |
|--------------------|----------------------------|-------------------------------------|---------------------------------------------------------------------------------------------------------------------------------------------------------------------|-------------------------------------------------------------|--------------------------------------------------------------------------------------------------------------------------------------------------------------------------------------------------------------------------------------------------------------------|
| <b>Opportunity</b> |                            |                                     |                                                                                                                                                                     |                                                             |                                                                                                                                                                                                                                                                    |
|                    | Social                     | Social influence                    | Health professionals assume the patient's gender based on his/her societal role (Barrier)                                                                           | Social influence                                            | In the CPD course, a clinical case vignette could demonstrate the integration of sex and gender considerations and reflect on the different social stigmas associated with gender (Modelling)                                                                      |
|                    | Physical                   | Environmental context and resources | The patient's sex is routinely recorded in medical notes (Facilitator)                                                                                              |                                                             | CPD training could expand on routine practices that already include sex and gender in clinical practice, example: recording sex, but going further by asking questions about perceived gender, sexual orientation (Training)                                       |
|                    |                            |                                     | The androcentric nature of the French language (the use of masculine generic language to refer to men and women, as well as other gender representations) (Barrier) |                                                             | CPD training could give prompts/cues to demonstrate sex- and gender-sensitive medical language (e.g. revised forms, gender sensitive formulation of questions on sexuality and relationships) to promote equity in clinical practice (Environmental restructuring) |
|                    |                            |                                     | The healthcare professional perceives that the language used by physicians towards a patient may be                                                                 |                                                             | The CPD training could encourage health professionals to self-monitor their use of gender inclusive language (Training/Enablement)                                                                                                                                 |
|                    |                            |                                     |                                                                                                                                                                     |                                                             | CPD training could demonstrate sex- and gender-sensitive behaviours and patterns of speech through video animations of clinical visits between health professionals and their                                                                                      |



1  
2  
3  
4  
5  
6  
7  
8  
9  
10  
11  
12  
13  
14  
15  
16  
17  
18  
19  
20  
21  
22  
23  
24  
25  
26  
27  
28  
29  
30  
31  
32  
33  
34  
35  
36  
37  
38  
39  
40  
41  
42  
43  
44  
45  
46  
47  
48  
49  
50  
51  
52  
53  
54  
55  
56  
57  
58  
59  
60

|                   |                                                                                                                                          |                                                                                                                                               |                                                 |                                                                                                                                                                                                                                              |                                                                                                                                                                                                                                                                  |
|-------------------|------------------------------------------------------------------------------------------------------------------------------------------|-----------------------------------------------------------------------------------------------------------------------------------------------|-------------------------------------------------|----------------------------------------------------------------------------------------------------------------------------------------------------------------------------------------------------------------------------------------------|------------------------------------------------------------------------------------------------------------------------------------------------------------------------------------------------------------------------------------------------------------------|
|                   |                                                                                                                                          |                                                                                                                                               | different according to sex and gender (Barrier) |                                                                                                                                                                                                                                              | patients, as well as showing various health professional and patient scenarios (Training)                                                                                                                                                                        |
| <b>Motivation</b> |                                                                                                                                          |                                                                                                                                               |                                                 |                                                                                                                                                                                                                                              |                                                                                                                                                                                                                                                                  |
| Reflective        | Social and professional role and identity                                                                                                | The health professional reflects positively on his/her relationship with the patient (Facilitator)                                            |                                                 |                                                                                                                                                                                                                                              |                                                                                                                                                                                                                                                                  |
|                   | Beliefs about capabilities                                                                                                               | The health professional feels he/she can accurately observe the phenotype of the patient (Facilitator)                                        | Beliefs about capabilities                      |                                                                                                                                                                                                                                              | Self-monitoring of behaviour to encourage health professionals to analyse how they record patient phenotypes: what do they take into consideration? Do they ask specific questions or is it strictly observational? (Enablement)                                 |
|                   | Intentions                                                                                                                               | The health professional has the intention to change his/her therapeutic approach by considering the differences of gender (Facilitator)       | Intention                                       |                                                                                                                                                                                                                                              | Enable health professionals to change their behaviour by demonstrating strategies they have already undertaken to consider the sex of the patient during their therapeutic approaches (Modelling)                                                                |
|                   |                                                                                                                                          | The health professional does not have the intention to change his/her therapeutic approach by considering the differences of gender (Barrier) |                                                 |                                                                                                                                                                                                                                              | Offer information about social consequences of not modifying their care to include sex and gender considerations (Education)<br><br>Offer information about health consequences of not modifying their care to include sex and gender considerations (Education) |
| Goals             | The health professional does not perceive the integration of the concepts of sex and gender in clinical practice as a priority (Barrier) |                                                                                                                                               |                                                 | Enable participants to engage in action planning to include sex and gender considerations in their clinical practice, as well as implementation intentions (Enablement)<br><br>Enable participants to engage in specific goal setting on how |                                                                                                                                                                                                                                                                  |

1  
2  
3  
4  
5  
6  
7  
8  
9  
10  
11  
12  
13  
14  
15  
16  
17  
18  
19  
20  
21  
22  
23  
24  
25  
26  
27  
28  
29  
30  
31  
32  
33  
34  
35  
36  
37  
38  
39  
40  
41  
42  
43  
44  
45  
46  
47  
48  
49  
50  
51  
52  
53  
54  
55  
56  
57  
58  
59  
60

|                   |               |                                          |                                                                                                                                     |                            |                                                                                                                                                                                                                                                                                                            |
|-------------------|---------------|------------------------------------------|-------------------------------------------------------------------------------------------------------------------------------------|----------------------------|------------------------------------------------------------------------------------------------------------------------------------------------------------------------------------------------------------------------------------------------------------------------------------------------------------|
|                   |               |                                          |                                                                                                                                     |                            | they would include sex and gender considerations in their clinical practice (Goal setting)                                                                                                                                                                                                                 |
|                   |               | Beliefs about consequences               | The health professional mentions that they would not change their therapeutic approach according to the patient's gender (Barrier)  | Beliefs about consequences | Offer CPD content with credible sources about the health consequences of not modifying their care to include sex and gender considerations (Education)<br><br>Demonstration of various techniques, shared decision making, cues and prompts that include sex and gender considerations in care (Modelling) |
| <b>Capability</b> |               |                                          |                                                                                                                                     |                            |                                                                                                                                                                                                                                                                                                            |
|                   | Psychological | Memory, Attention and Decision Processes | The health professional perceives that sex and gender are not systematic in the decision-making process (Barrier)                   |                            | Offer specific training to create routine and habit formation that encourages the systematic inclusion of sex and gender considerations in the decision-making process (Training)                                                                                                                          |
|                   |               | Cognitive and interpersonal skills       | The health professional does not assume the sex of the patient and acknowledges different treatment methods by gender (Facilitator) |                            |                                                                                                                                                                                                                                                                                                            |
|                   |               |                                          | The health professional acknowledges different clinical representation by gender (Facilitator)                                      |                            |                                                                                                                                                                                                                                                                                                            |
|                   |               |                                          | The health professional assumed the gender of the patient when analyzing a clinical vignette (Barrier)                              |                            | As part of skills training, the CPD training could demonstrate how to explore the different aspects of sex attribution, without assuming the sex of the patient (Training)<br><br>Give specific instructions on how to explore the different aspects of sex attribution,                                   |

1  
2  
3  
4  
5  
6  
7  
8  
9  
10  
11  
12  
13  
14  
15  
16  
17  
18  
19  
20  
21  
22  
23  
24  
25  
26  
27  
28  
29  
30  
31  
32  
33  
34  
35  
36  
37  
38  
39  
40  
41  
42  
43  
44  
45  
46  
47  
48  
49  
50  
51  
52  
53  
54  
55  
56  
57  
58  
59  
60

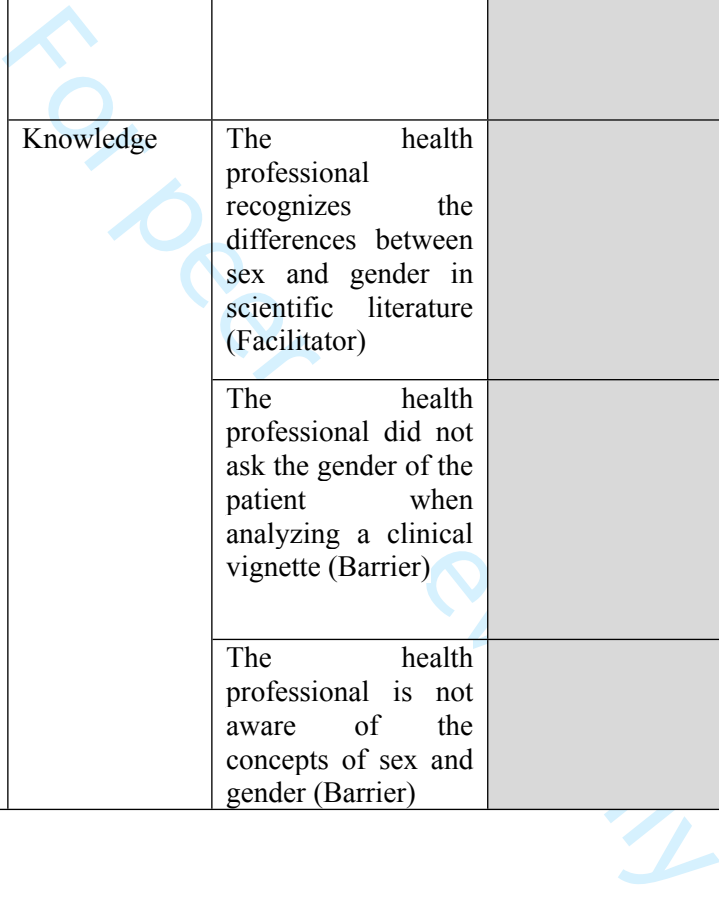

|  |  |           |                                                                                                                  |  |                                                                                                                                                                                                                                                                                                                                                              |
|--|--|-----------|------------------------------------------------------------------------------------------------------------------|--|--------------------------------------------------------------------------------------------------------------------------------------------------------------------------------------------------------------------------------------------------------------------------------------------------------------------------------------------------------------|
|  |  |           |                                                                                                                  |  | <p>without assuming the sex of the patient (Training)</p> <p>Offer feedback on outcome(s) of assuming the sex of the patient in a clinical case vignette (Training)</p> <p>Offer a practice/rehearsal period after receiving instructions on how to explore the different aspects of sex attribution, without assuming the sex of the patient (Training)</p> |
|  |  | Knowledge | The health professional recognizes the differences between sex and gender in scientific literature (Facilitator) |  |                                                                                                                                                                                                                                                                                                                                                              |
|  |  |           | The health professional did not ask the gender of the patient when analyzing a clinical vignette (Barrier)       |  | <p>Include information on the possible clinical outcome(s) of assuming the wrong sex or gender of the patient (Education)</p>                                                                                                                                                                                                                                |
|  |  |           | The health professional is not aware of the concepts of sex and gender (Barrier)                                 |  | <p>Offer information about health consequences of not considering or confusing sex and gender terms (Education)</p>                                                                                                                                                                                                                                          |

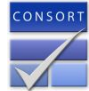

## CONSORT 2010 checklist of information to include when reporting a pilot or feasibility trial\*

| Section/Topic             | Item No | Checklist item                                                                                                                                                                              | Reported on page No |
|---------------------------|---------|---------------------------------------------------------------------------------------------------------------------------------------------------------------------------------------------|---------------------|
| <b>Title and abstract</b> |         |                                                                                                                                                                                             |                     |
|                           | 1a      | Identification as a pilot or feasibility randomised trial in the title                                                                                                                      | 1 (mixed methods)   |
|                           | 1b      | Structured summary of pilot trial design, methods, results, and conclusions (for specific guidance see CONSORT abstract extension for pilot trials)                                         | 4                   |
| <b>Introduction</b>       |         |                                                                                                                                                                                             |                     |
| Background and objectives | 2a      | Scientific background and explanation of rationale for future definitive trial, and reasons for randomised pilot trial                                                                      | 7-8                 |
|                           | 2b      | Specific objectives or research questions for pilot trial                                                                                                                                   | 8                   |
| <b>Methods</b>            |         |                                                                                                                                                                                             |                     |
| Trial design              | 3a      | Description of pilot trial design (such as parallel, factorial) including allocation ratio                                                                                                  | 8                   |
|                           | 3b      | Important changes to methods after pilot trial commencement (such as eligibility criteria), with reasons                                                                                    | NA                  |
| Participants              | 4a      | Eligibility criteria for participants                                                                                                                                                       | 9-10                |
|                           | 4b      | Settings and locations where the data were collected                                                                                                                                        | 9-10                |
|                           | 4c      | How participants were identified and consented                                                                                                                                              | 9-10                |
| Interventions             | 5       | The interventions for each group with sufficient details to allow replication, including how and when they were actually administered                                                       | 9-10-11             |
| Outcomes                  | 6a      | Completely defined prespecified assessments or measurements to address each pilot trial objective specified in 2b, including how and when they were assessed                                | 11-12               |
|                           | 6b      | Any changes to pilot trial assessments or measurements after the pilot trial commenced, with reasons                                                                                        | NA                  |
|                           | 6c      | If applicable, prespecified criteria used to judge whether, or how, to proceed with future definitive trial                                                                                 | NA                  |
| Sample size               | 7a      | Rationale for numbers in the pilot trial                                                                                                                                                    | 11                  |
|                           | 7b      | When applicable, explanation of any interim analyses and stopping guidelines                                                                                                                | NA                  |
| Randomisation:            |         |                                                                                                                                                                                             |                     |
| Sequence generation       | 8a      | Method used to generate the random allocation sequence                                                                                                                                      | NA                  |
|                           | 8b      | Type of randomisation(s); details of any restriction (such as blocking and block size)                                                                                                      | NA                  |
| Allocation concealment    | 9       | Mechanism used to implement the random allocation sequence (such as sequentially numbered containers), describing any steps taken to conceal the sequence until interventions were assigned | NA                  |

|                                                      |     |                                                                                                                                                                                       |          |
|------------------------------------------------------|-----|---------------------------------------------------------------------------------------------------------------------------------------------------------------------------------------|----------|
| mechanism                                            |     |                                                                                                                                                                                       |          |
| Implementation                                       | 10  | Who generated the random allocation sequence, who enrolled participants, and who assigned participants to interventions                                                               | NA       |
| Blinding                                             | 11a | If done, who was blinded after assignment to interventions (for example, participants, care providers, those assessing outcomes) and how                                              | 10-11    |
|                                                      | 11b | If relevant, description of the similarity of interventions                                                                                                                           | 10-11    |
| Statistical methods                                  | 12  | Methods used to address each pilot trial objective whether qualitative or quantitative                                                                                                | 12-13    |
| <b>Results</b>                                       |     |                                                                                                                                                                                       |          |
| Participant flow (a diagram is strongly recommended) | 13a | For each group, the numbers of participants who were approached and/or assessed for eligibility, randomly assigned, received intended treatment, and were assessed for each objective | 14       |
|                                                      | 13b | For each group, losses and exclusions after randomisation, together with reasons                                                                                                      | 14       |
| Recruitment                                          | 14a | Dates defining the periods of recruitment and follow-up                                                                                                                               | 14       |
|                                                      | 14b | Why the pilot trial ended or was stopped                                                                                                                                              | NA       |
| Baseline data                                        | 15  | A table showing baseline demographic and clinical characteristics for each group                                                                                                      | 14-15    |
| Numbers analysed                                     | 16  | For each objective, number of participants (denominator) included in each analysis. If relevant, these numbers should be by randomised group                                          | 14-15-16 |
| Outcomes and estimation                              | 17  | For each objective, results including expressions of uncertainty (such as 95% confidence interval) for any estimates. If relevant, these results should be by randomised group        | 15-16-17 |
| Ancillary analyses                                   | 18  | Results of any other analyses performed that could be used to inform the future definitive trial                                                                                      | NA       |
| Harms                                                | 19  | All important harms or unintended effects in each group (for specific guidance see CONSORT for harms)                                                                                 | NA       |
|                                                      | 19a | If relevant, other important unintended consequences                                                                                                                                  | NA       |
| <b>Discussion</b>                                    |     |                                                                                                                                                                                       |          |
| Limitations                                          | 20  | Pilot trial limitations, addressing sources of potential bias and remaining uncertainty about feasibility                                                                             | 24-25    |
| Generalisability                                     | 21  | Generalisability (applicability) of pilot trial methods and findings to future definitive trial and other studies                                                                     | 24       |
| Interpretation                                       | 22  | Interpretation consistent with pilot trial objectives and findings, balancing potential benefits and harms, and considering other relevant evidence                                   | 22-23-24 |
|                                                      | 22a | Implications for progression from pilot to future definitive trial, including any proposed amendments                                                                                 | 23-24    |
| <b>Other information</b>                             |     |                                                                                                                                                                                       |          |
| Registration                                         | 23  | Registration number for pilot trial and name of trial registry                                                                                                                        | 5        |
| Protocol                                             | 24  | Where the pilot trial protocol can be accessed, if available                                                                                                                          | NA       |
| Funding                                              | 25  | Sources of funding and other support (such as supply of drugs), role of funders                                                                                                       | 27       |
|                                                      | 26  | Ethical approval or approval by research review committee, confirmed with reference number                                                                                            | 27       |

1  
2  
3  
4  
5  
6  
7  
8  
9  
10  
11  
12  
13  
14  
15  
16  
17  
18  
19  
20  
21  
22  
23  
24  
25  
26  
27  
28  
29  
30  
31  
32  
33  
34  
35  
36  
37  
38  
39  
40  
41  
42  
43  
44  
45  
46

Citation: Eldridge SM, Chan CL, Campbell MJ, Bond CM, Hopewell S, Thabane L, et al. CONSORT 2010 statement: extension to randomised pilot and feasibility trials. *BMJ*. 2016;355.  
\*We strongly recommend reading this statement in conjunction with the CONSORT 2010, extension to randomised pilot and feasibility trials, Explanation and Elaboration for important clarifications on all the items. If relevant, we also recommend reading CONSORT extensions for cluster randomised trials, non-inferiority and equivalence trials, non-pharmacological treatments, herbal interventions, and pragmatic trials. Additional extensions are forthcoming: for those and for up to date references relevant to this checklist, see [www.consort-statement.org](http://www.consort-statement.org).

For peer review only

# BMJ Open

## Integration of Sex and Gender in a Continuing Professional Development Course on Diabetes and Depression: A Mixed Methods Feasibility Study

|                                 |                                                                                                                                                                                                                                                                                                                                                                                                                                                                                                                                                                                                                                                                                                                                                                                                                                                                                                                                                                                                                                                                                                                                                                                                                                                                                                                                                                                                                                                                                                                                                                                                                                 |
|---------------------------------|---------------------------------------------------------------------------------------------------------------------------------------------------------------------------------------------------------------------------------------------------------------------------------------------------------------------------------------------------------------------------------------------------------------------------------------------------------------------------------------------------------------------------------------------------------------------------------------------------------------------------------------------------------------------------------------------------------------------------------------------------------------------------------------------------------------------------------------------------------------------------------------------------------------------------------------------------------------------------------------------------------------------------------------------------------------------------------------------------------------------------------------------------------------------------------------------------------------------------------------------------------------------------------------------------------------------------------------------------------------------------------------------------------------------------------------------------------------------------------------------------------------------------------------------------------------------------------------------------------------------------------|
| Journal:                        | <i>BMJ Open</i>                                                                                                                                                                                                                                                                                                                                                                                                                                                                                                                                                                                                                                                                                                                                                                                                                                                                                                                                                                                                                                                                                                                                                                                                                                                                                                                                                                                                                                                                                                                                                                                                                 |
| Manuscript ID                   | bmjopen-2021-050890.R2                                                                                                                                                                                                                                                                                                                                                                                                                                                                                                                                                                                                                                                                                                                                                                                                                                                                                                                                                                                                                                                                                                                                                                                                                                                                                                                                                                                                                                                                                                                                                                                                          |
| Article Type:                   | Original research                                                                                                                                                                                                                                                                                                                                                                                                                                                                                                                                                                                                                                                                                                                                                                                                                                                                                                                                                                                                                                                                                                                                                                                                                                                                                                                                                                                                                                                                                                                                                                                                               |
| Date Submitted by the Author:   | 22-Feb-2022                                                                                                                                                                                                                                                                                                                                                                                                                                                                                                                                                                                                                                                                                                                                                                                                                                                                                                                                                                                                                                                                                                                                                                                                                                                                                                                                                                                                                                                                                                                                                                                                                     |
| Complete List of Authors:       | <p>Deom Tardif, Alèxe; VITAM - Centre de recherche en santé durable, Centre intégré universitaire de santé et services sociaux de la Capitale-Nationale; Université Laval, Department of Social and Preventive Medicine, Faculty of Medicine</p> <p>Gogovor, Amédé; VITAM - Centre de recherche en santé durable, Centre intégré universitaire de santé et services sociaux de la Capitale-Nationale; Université Laval, Department of Family Medicine and Emergency Medicine, Faculty of Medicine</p> <p>Guay-Bélanger, Sabrina ; VITAM - Centre de recherche en santé durable, Centre intégré universitaire de santé et services sociaux de la Capitale-Nationale</p> <p>Audet, Denis; University Family Medicine Group Saint-François-d'Assise Parent, Nicole; Médecins francophones du Canada</p> <p>Gaudreau, André; Patient Partner</p> <p>Remy-Lamarche, Danièle; Patient Partner</p> <p>Vigneault, Luc; Patient Partner</p> <p>Ngueta, Gérard; VITAM - Centre de recherche en santé durable, Centre intégré universitaire de santé et services sociaux de la Capitale-Nationale</p> <p>Bilodeau, André; McGill University Faculty of Medicine and Health Sciences, Department of Family Medicine</p> <p>Légaré, France; VITAM - Centre de recherche en santé durable, Centre intégré universitaire de santé et services sociaux de la Capitale-Nationale; Université Laval, Department of Family Medicine and Emergency Medicine, Faculty of Medicine</p> <p>mATrICES-F Group, the; VITAM - Centre de recherche en santé durable, Centre intégré universitaire de santé et services sociaux de la Capitale-Nationale</p> |
| <b>Primary Subject Heading</b>: | Medical education and training                                                                                                                                                                                                                                                                                                                                                                                                                                                                                                                                                                                                                                                                                                                                                                                                                                                                                                                                                                                                                                                                                                                                                                                                                                                                                                                                                                                                                                                                                                                                                                                                  |
| Secondary Subject Heading:      | General practice / Family practice                                                                                                                                                                                                                                                                                                                                                                                                                                                                                                                                                                                                                                                                                                                                                                                                                                                                                                                                                                                                                                                                                                                                                                                                                                                                                                                                                                                                                                                                                                                                                                                              |
| Keywords:                       | EDUCATION & TRAINING (see Medical Education & Training), PUBLIC HEALTH, PRIMARY CARE                                                                                                                                                                                                                                                                                                                                                                                                                                                                                                                                                                                                                                                                                                                                                                                                                                                                                                                                                                                                                                                                                                                                                                                                                                                                                                                                                                                                                                                                                                                                            |
|                                 |                                                                                                                                                                                                                                                                                                                                                                                                                                                                                                                                                                                                                                                                                                                                                                                                                                                                                                                                                                                                                                                                                                                                                                                                                                                                                                                                                                                                                                                                                                                                                                                                                                 |

1  
2  
3  
4  
5  
6  
7  
8  
9  
10  
11  
12  
13  
14  
15  
16  
17  
18  
19  
20  
21  
22  
23  
24  
25  
26  
27  
28  
29  
30  
31  
32  
33  
34  
35  
36  
37  
38  
39  
40  
41  
42  
43  
44  
45  
46  
47  
48  
49  
50  
51  
52  
53  
54  
55  
56  
57  
58  
59  
60

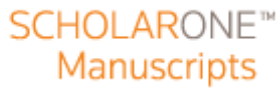





I, the Submitting Author has the right to grant and does grant on behalf of all authors of the Work (as defined in the below author licence), an exclusive licence and/or a non-exclusive licence for contributions from authors who are: i) UK Crown employees; ii) where BMJ has agreed a CC-BY licence shall apply, and/or iii) in accordance with the terms applicable for US Federal Government officers or employees acting as part of their official duties; on a worldwide, perpetual, irrevocable, royalty-free basis to BMJ Publishing Group Ltd ("BMJ") its licensees and where the relevant Journal is co-owned by BMJ to the co-owners of the Journal, to publish the Work in this journal and any other BMJ products and to exploit all rights, as set out in our [licence](#).

The Submitting Author accepts and understands that any supply made under these terms is made by BMJ to the Submitting Author unless you are acting as an employee on behalf of your employer or a postgraduate student of an affiliated institution which is paying any applicable article publishing charge ("APC") for Open Access articles. Where the Submitting Author wishes to make the Work available on an Open Access basis (and intends to pay the relevant APC), the terms of reuse of such Open Access shall be governed by a Creative Commons licence – details of these licences and which [Creative Commons](#) licence will apply to this Work are set out in our licence referred to above.

Other than as permitted in any relevant BMJ Author's Self Archiving Policies, I confirm this Work has not been accepted for publication elsewhere, is not being considered for publication elsewhere and does not duplicate material already published. I confirm all authors consent to publication of this Work and authorise the granting of this licence.

1  
2  
3 **Integration of Sex and Gender in a Continuing Professional Development Course on**  
4 **Diabetes and Depression: A Mixed Methods Feasibility Study**  
5

6  
7 Deom Tardif A<sup>1,2</sup>, Gogovor, A<sup>1,3</sup>, Guay-Bélanger S<sup>1</sup>, Audet D<sup>4</sup>, Parent N<sup>5</sup>, Gaudreau A<sup>6</sup>,  
8 Rémy-Lamarche D<sup>6</sup>, Vigneault L<sup>6</sup>, Ngueta G<sup>1</sup>, Bilodeau A<sup>7</sup>, Légaré F<sup>1,3</sup> and the  
9 mATrICES-F Group  
10  
11

12  
13 <sup>1</sup>VITAM – Centre de recherche en santé durable, Centre intégré universitaire de santé et  
14 services sociaux de la Capitale-Nationale, Quebec City, Quebec, Canada  
15

16  
17 <sup>2</sup>Department of Social and Preventive Medicine, Faculty of Medicine, Université Laval,  
18 Quebec City, Quebec, Canada  
19

20  
21 <sup>3</sup>Department of Family Medicine and Emergency Medicine, Faculty of Medicine,  
22 Université Laval, Quebec City, Quebec, Canada  
23

24  
25 <sup>4</sup>University Family Medicine Group Saint-François-d'Assise, Quebec City, Quebec,  
26 Canada  
27

28  
29 <sup>5</sup>Médecins francophones du Canada, Montreal, Quebec, Canada  
30

31  
32 <sup>6</sup>Patient Partner, Quebec, Canada  
33

34  
35 <sup>7</sup>Department of Family Medicine, Faculty of Medicine and Health Sciences,  
36 McGill University, Montreal, Quebec, Canada  
37  
38  
39  
40  
41  
42  
43  
44  
45  
46  
47  
48  
49  
50  
51  
52  
53  
54  
55  
56  
57  
58  
59  
60

**Collaborators mATrICES-F Group:**

Alèxe Deom Tardif, Université Laval

Amédé Gogovor, Université Laval

André Bilodeau, McGill University

André Bussièrès, McGill University

André Gaudreau, Patient-partner

Audrey Ferron Parayre, University of Ottawa

Caroline Jose, Université de Moncton

Danièle Remy-Lamarche, Patient-partner

Dawn Stacey, University of Ottawa

Denis Audet, University Family Medicine Group Saint-François-d'Assise

Denis Prud'homme, Université de Moncton

France Légaré, Université Laval

Francine Borduas, Médecins francophones du Canada

Gerard Ngueta, VITAM – Centre de recherche en santé durable

Geneviève Roch, Université Laval

Hélène Lee-Gosselin, Université Laval

Laurie Laplanche, Université Laval

Luc Vigneault, Patient-partner

Maman Joyce Dogba, Université Laval

Marie-Claude Tremblay, Université Laval

Marie-Pierre Gagnon, Université Laval

Nicole Parent, Médecins francophones du Canada

1  
2  
3 Sabrina Guay-Bélanger, VITAM – Centre de recherche en santé durable  
4

5 Sophie Desroches, Université Laval  
6

7 Valérie Borde, Centre DECLIC  
8  
9

10 **Corresponding author:**  
11

12 France Légaré, BSc Arch, MD, MSc, PhD, CCFP, FCFP.  
13

14 VITAM – Centre de recherche en santé durable  
15

16 Pavillon Landry-Poulin, entrée A-12, bureau A-4574  
17

18 2525, chemin de la Canardière  
19

20 Quebec City, Quebec, G1J 0A4, Canada  
21

22 Email: [France.legare@mfa.ulaval.ca](mailto:France.legare@mfa.ulaval.ca)  
23  
24

25  
26  
27  
28  
29 **Email addresses:**  
30

31 ADT: [alexe.deom-tardif.1@ulaval.ca](mailto:alexe.deom-tardif.1@ulaval.ca)  
32

33 AGo: [amede.gogovor.1@ulaval.ca](mailto:amede.gogovor.1@ulaval.ca)  
34

35 SGB: [sabrina.guay-belanger.ciusscn@ssss.gouv.qc.ca](mailto:sabrina.guay-belanger.ciusscn@ssss.gouv.qc.ca)  
36

37 DA: [audet\\_denis@videotron.ca](mailto:audet_denis@videotron.ca)  
38

39 NP: [nparent@medecinsfrancophones.ca](mailto:nparent@medecinsfrancophones.ca)  
40

41 AGa: [andrepositif@outlook.com](mailto:andrepositif@outlook.com)  
42

43 DRL: [remy\\_lamarche.daniele@videotron.ca](mailto:remy_lamarche.daniele@videotron.ca)  
44

45 LV: [luc.vigneault2@gmail.com](mailto:luc.vigneault2@gmail.com)  
46

47 GN: [gerard.ngueta.ciusscn@ssss.gouv.qc.ca](mailto:gerard.ngueta.ciusscn@ssss.gouv.qc.ca)  
48

49 AB: [andre.bilodeau@mcgill.ca](mailto:andre.bilodeau@mcgill.ca)  
50  
51  
52  
53  
54  
55  
56  
57  
58  
59  
60

## Abstract

**Objectives** Assess the feasibility and impact of a continuous professional development (CPD) course on type-2 diabetes and depression on health professionals' intention to include sex and gender considerations in patient care.

**Design and setting** In collaboration with CPD organisations and patient-partners, we conducted a mixed-methods feasibility controlled trial with post-intervention measures in three Canadian provinces.

**Participants** Of 178 eligible health professionals, 127 completed questionnaires and 67 participated in semi-structured group discussions.

**Intervention and comparator** An interactive one-hour CPD course, co-designed with patient-partners, on diabetes and depression with sex and gender considerations (innovation) was compared to a similar course without these considerations (comparator).

**Outcomes** Feasibility of recruitment and retention of CPD organisations and patient-partners throughout the study; adherence to planned activities; health professionals' intention to include sex and gender considerations in patient care as measured by the CPD-Reaction questionnaire; and barriers and facilitators using the Theoretical Domains Framework.

**Results** All recruited CPD organisations and patient-partners remained engaged throughout the study. All planned CPD courses occurred. Overall, 71% of eligible health professionals participated (63% under 44 years old; 79.5% women; 67.7% practising in French; 66.9% practising in Quebec; 78.8% in urban practice). After training, mean intention scores for the innovation (n=49) and control groups (n=78) were  $5.65 \pm 0.19$  and  $5.19 \pm 0.15$ , respectively. Mean difference was  $-0.47$  (CI  $-0.95$  to  $0.01$ ;  $p=0.06$ ). Adjusted for age, gender and practice settings, mean difference was  $-0.57$  (CI  $-1.09$  to  $-0.05$ ;  $p=0.03$ ). We identified eight Theoretical Domains related to barriers and six related to facilitators for providing sex- and gender-adapted diabetes and depression care.

**Conclusions** CPD training on diabetes and depression that includes sex and gender considerations is feasible and, compared to CPD training that does not, may prompt health

1  
2  
3 professionals to modify their care. Addressing identified barriers and facilitators could  
4 increase intention.  
5

6  
7 **Registration number:** NCT03928132 with ClinicalTrials.gov.  
8

9  
10 **Keywords:** Sex and gender, knowledge translation, continuous professional development,  
11 diabetes, depression, patient engagement, Theory of Planned Behaviour, Theoretical  
12 Domains, COM-B  
13  
14  
15  
16  
17  
18  
19  
20  
21  
22  
23  
24  
25  
26  
27  
28  
29  
30  
31  
32  
33  
34  
35  
36  
37  
38  
39  
40  
41  
42  
43  
44  
45  
46  
47  
48  
49  
50  
51  
52  
53  
54  
55  
56  
57  
58  
59  
60

### Strengths and limitations of this study

- Continuous professional development (CPD) courses that included sex and gender considerations were co-designed with patients experiencing diabetes and/or depression.
- Outcome measures were informed by theory.
- This mixed-methods controlled trial used post-intervention measures only, as pre-intervention measures were not feasible. Although randomized allocation of participants was not possible, it was feasible to conduct a mixed-methods controlled trial.

## INTRODUCTION

A variety of research initiatives are attempting to reduce health inequities between men and women (1, 2). Research that includes sex- and gender-based analysis results in more accurate evidence, more relevant recommendations, more specifically-targeted interventions, and better outcomes (3-6). Sex differences are biology-linked differences between females and males caused by different sex chromosomes, sex-specific gene expression of autosomes, sex hormones, and their effects on organ systems (7). Gender differences arise from sociocultural processes such as the different behaviours of women and men, their exposure to environmental influences, impacts of nutrition, lifestyles or stress, and attitudes towards illness, treatment and prevention (7). Gender roles and gender identity are influenced by a complex interplay between genetic, endocrinal, and social factors (8). Finally, sex and gender are not straightforward binary categories. Many femininities and masculinities exist and can influence other important sociodemographic variables (9).

During their lifetime women are twice as likely as men to be diagnosed with depression. In contrast, three times as many men commit suicide (5, 10, 11). Recent evidence supports a link between type 2 diabetes (T2D) and depression, and shows that sex and gender are influential factors in this comorbidity (7, 9). The prevalence of depression in diabetic patients is higher in females than males (23.8% and 12.8%, respectively) (7). On the other hand, a pooled result from 32 studies described that the risk of developing T2D in patients diagnosed with depression is higher in men than in women (RC=1.63 vs RC=1.29, respectively) (7, 12, 13). The differences are explained by biological differences and psychosocial factors such as body mass index, differences in the distribution of types of adipose tissue, an imbalance of sex hormones, socioeconomic status, psychosocial stress, and sleep deprivation (7, 9). Co-morbidity and mortality associated with the complications of T2D and depression are also different for men and women. For instance, men develop diabetic food syndrome at earlier ages and are more likely to have complications leading to amputations (7, 14). Women, on the other hand, have a higher risk of metabolic syndrome and fatal coronary heart disease than men (7, 15, 16). T2D and depression are also affected by gender differences. This gap could be explained in part by the different



1  
2  
3 behaviours associated gender representations of men and women, as well as their different  
4 perceptions of stress (17-19).

7  
8 Despite the impacts of sex and gender differences on prevalence, diagnosis, treatment,  
9 outcomes, and equity, evidence on the importance of these differences has yet to be  
10 translated adequately into clinical training or practice (2, 5, 20). For example, a 2017  
11 review suggested that only 35% of studies on Canadian practice guidelines, a cornerstone  
12 of knowledge translation, reported screening, diagnosis or management considerations  
13 specific to sex or gender, and only 25% used the terms “sex” and “gender” correctly (21).

18 Continuing professional development (CPD) is another cornerstone of knowledge  
19 translation as it mobilizes professional and regulatory bodies as well as educational  
20 institutions to foster changes in clinical practice (22, 23). We argue that integrating sex  
21 and gender considerations into CPD is a promising avenue for addressing the inequities  
22 between men and women (5). We define CPD as all educational activities serving to  
23 maintain or increase the knowledge, skills, work performance, and relationships that a  
24 clinician needs to serve patients, the public or the profession. (5, 24, 25). Courses should  
25 be informed by theory-based factors known to influence the adoption of a given  
26 behaviour. Although one of several other factors influencing behaviour change, such as  
27 organizational constraints, intention is considered an acceptable proxy. Indeed, according  
28 to Godin’s integrated model for health professional behaviour change, behavioral  
29 intention is the central influencing factor on behaviour adoption. In turn, this intention is  
30 under the influence of a number of other socio-cognitive factors (26). We aimed to assess  
31 the feasibility and impact of including sex and gender considerations in a CPD course on  
32 T2D and depression on health professionals’ intention to include sex and gender  
33 considerations in patient care.

## 46 **METHODS**

### 49 **Study design and setting**

51 We conducted a non-randomized mixed-methods study with a concurrent embedded  
52 design: (1) a two-arm non-randomized controlled trial with post-intervention measures  
53 only; and (2) semi-structured group discussions following the CPD course. We used the  
54  
55  
56  
57

1  
2  
3 Theory of Planned Behavior for quantitative analysis (27, 28), the Theoretical Domains  
4 Framework (TDF) for qualitative analysis (29, 30), and the COM-B (Capability,  
5 Opportunity, Motivation and Behavior) model to triangulate findings (31). We followed  
6 the CONSORT extension for Pilot and Feasibility Trials Checklist to report results (32).  
7  
8  
9

10 This project is one of six that were funded by the Canadian Institutes of Health Research  
11 to explore sex and gender issues in knowledge translation (33), gender transformative  
12 approaches to knowledge translation, and sex- and gender-based analysis (5, 33).  
13  
14  
15

16 A multidisciplinary team was created of 25 researchers: two sex and gender specialists,  
17 three patient-partners with experience with T2D and/or mental health issues (two men  
18 and one woman), two physicians, one nurse, two CPD managers, one research assistant  
19 and two trainees. An executive committee of 12 team members (including all patient-  
20 partners) held monthly meetings addressing the main concerns in each research phase.  
21 They chose the clinical topic of the course based on needs expressed by CPD providers  
22 (see Innovation below). They then adapted an existing diabetes and depression CPD  
23 course to include sex and gender considerations and contacted CPD providers in three  
24 Canadian provinces to collaborate on implementing the courses.  
25  
26  
27  
28  
29  
30  
31

### 32 **Patient involvement**

33  
34  
35 Three patient-partners, core members of the executive committee, contributed to  
36 governance (e.g., attending meetings and courses, making executive decisions) and  
37 innovation design. They contributed their experience to the CPD course, helped collect  
38 data and interpret results, coauthored this paper and advised us on plain language use for  
39 our presentations.  
40  
41  
42  
43

### 44 **Participants and recruitment**

45  
46 All health professionals working in the clinical settings where our CPD course was  
47 advertised, including hospitals and family medicine groups, or participating in the  
48 continuing medical education (CME) conference where the course was to be offered,  
49 were invited to participate. Invitations were by email and through the Internet registration  
50 platforms of CME conferences in three Canadian provinces (Quebec, Ontario, New-  
51 Brunswick). Participants stayed in their respective groups for the semi-structured group  
52  
53  
54  
55  
56  
57  
58  
59  
60

1  
2  
3 discussion that immediately followed the CPD course. Inclusion criteria were: practising  
4 health professionals available to participate in person for the whole course; and fluent in  
5 French (all our CPD courses were in French). Ethical approval was obtained from the  
6 Centre intégré universitaire de santé et de services sociaux de la Capitale-Nationale  
7 (CIUSSS-CN) Ethics Board (2017-2018-16 MP), the Hôpital Montfort Research ethics  
8 board (19-20-05-009), and the Vitalité Health Network research ethics board (CER-2019-  
9 18).

## 16 **Innovation**

18 Informed by a continuing medical education needs assessment by our key CPD  
19 stakeholder and partner, Médecins francophones du Canada (data not published), we  
20 chose patients with T2D and depression combined as the clinical topic, as physicians felt  
21 there was a gap in their education about this comorbidity. There is growing evidence of  
22 a link between T2D and depression and the importance of sex as a risk factor for this  
23 comorbidity (34-36). The team adapted an existing T2D and depression CPD course to  
24 include evidence-based sex and gender considerations. The original course, a 1-hour  
25 classroom-based activity, describes links between T2D and depression, reviews  
26 CANMAT 2016 Depression Guidelines and reviews pharmacological and non-  
27 pharmacological treatment of T2D and depression. This original course was used in the  
28 control group. Participants in the innovation group attended the same course but adapted  
29 to integrate sex- and gender-specific content including: 1) definitions and differences  
30 between the concepts of sex and gender, 2) epidemiological data on the differences in  
31 incidence, prevalence, morbidity and mortality between men and women with T2D and  
32 depression, and 3) a video explaining sex biases associated with these two conditions.  
33 The adapted CPD course (innovation) kept the original duration (one hour) and medical  
34 content of the original course (comparator). Links between T2D and depression were  
35 explained together with sex and gender differences, and reviews of pharmacological and  
36 non-pharmacological treatments were condensed. As per patient-partners'  
37 recommendations, we also held 30-minute semi-structured group discussions with both  
38 the innovation and control group immediately following the course. In the group  
39 discussion we presented a clinical case vignette on managing a patient with T2D and  
40  
41  
42  
43  
44  
45  
46  
47  
48  
49  
50  
51  
52  
53  
54  
55  
56  
57  
58  
59  
60

1  
2  
3 depression in which the health professional's behaviour exhibited various divergences  
4 with best clinical practices. We asked participants to write down the main divergence and  
5 to categorize it within five categories determined by our team: 1) failure to mention  
6 positive factors for recovery, 2) failure to engage the patient in their health-related  
7 decision, 3) sex and gender biases, 4) failure to take into account notions of sex and  
8 gender, and 5) cannot be categorized. We prompted participants to discuss their  
9 perception of sex and gender considerations by linking them to the clinical vignette and  
10 to their clinical experience of integrating sex and gender considerations in general.  
11  
12  
13  
14  
15  
16

17  
18 Depending on the setting (hospitals, family medicine groups, CME conferences) we either  
19 (1) assigned the participants to the control or innovation group on their arrival to achieve  
20 a balanced number of participants in both groups or (2) the participants registered in one  
21 group or the other, both groups being blinded to the innovation and control group. Thus  
22 participants entered the classroom for whichever course they signed up for. There was no  
23 communication between these groups, as the two courses were given simultaneously.  
24  
25  
26  
27  
28  
29  
30  
31  
32  
33  
34  
35  
36  
37  
38  
39  
40  
41  
42  
43  
44  
45  
46  
47  
48  
49  
50  
51  
52  
53  
54  
55  
56  
57  
58  
59  
60

Participants had all received the same invitation to attend a course on T2D and depression. There was no mention of sex and gender content before participants entered the room. Efforts were made to equally divide groups regarding number and gender of participants. At registration, participants were told that it was a research project that required their consent. Participants could attend the course and receive CME credits whether they chose to participate in the study or not. All CPD courses were delivered by the same two physicians (one man, assigned to the control group, and one woman, assigned to the innovation group) in all the research settings. We planned to offer six courses (three innovation and three control), two in each province (control and innovation simultaneously). Each course (both control and innovation) was a 45-minute lecture on T2D and depression followed by 15 minutes to fill in the CPD-Reaction questionnaire. An additional 30 minutes was planned for the semi-structured group discussion.

### **Outcome Measures**

We assessed three feasibility outcome measures: recruitment, retention and adherence: 1) recruitment of >90 course participants for six courses and study participation rate of >70% (28, 37), 2) retention of CPD organisations, collaborators and patient-partners

1  
2  
3 throughout the project, 3) the holding of all planned CPD courses in all three provinces.  
4 Sample size was based on consultations with clinic managers and CPD providers and on  
5 practical considerations (e.g. average size of CPD courses, venues, the course being  
6 provided in French only).  
7  
8  
9

10 We used CPD-Reaction (French version) to measure participants' behavioural intention  
11 to include sex and gender considerations in patient care. CPD-Reaction is a self-  
12 administered questionnaire (Cronbach  $\alpha$  0.79–0.89) (38, 39). Twelve items measure five  
13 constructs determined through a systematic review of theory-driven studies of behaviour  
14 change in health professionals: 1) behavioural intention, 2) beliefs about capabilities, 3)  
15 social influences, 4) beliefs about consequences, and 5) moral norm (37). The score for  
16 each construct is computed as the average of each item (Likert scale of 1 to 7), except for  
17 social influence, which is rated on a Likert scale of 1 to 5 (28). There is no global score.  
18 Finally, in group discussions, we identified barriers and facilitators to including sex and  
19 gender considerations in caring for patients with T2D and depression and mapped them  
20 onto the TDF. The TDF was developed through a consensus of experts who consolidated  
21 33 psychosocial theories of behaviour change to generate 14 domains (40).  
22  
23  
24  
25  
26  
27  
28  
29  
30  
31

### 32 **Data collection**

33  
34 Quantitative data were collected post-intervention with the CPD-Reaction questionnaire  
35 and sociodemographic questions (38). Semi-structured qualitative discussion took place  
36 in both innovation and control groups after the questionnaires were completed so as not  
37 to influence quantitative results. In both innovation and control groups, discussions were  
38 recorded and transcribed.  
39  
40  
41  
42  
43

### 44 **Analysis**

#### 45 **Quantitative analysis**

46  
47 Categorical variables were described by reporting absolute (n) and relative (%)  
48 frequencies. Continuous variables were described by their measure of central tendency  
49 (mean and/or median) and dispersion (standard deviation and percentiles). Covariance  
50 analysis was used to compare the scores of the innovation and control groups. As the  
51 intention did not have a perfectly Gaussian distribution, we also compared intention  
52  
53  
54  
55  
56  
57  
58  
59  
60

1  
2  
3 scores using Wilcoxon's non-parametric analysis and used the Kruskal-Wallis test to  
4 compare medians. We used Spearman's rank test to assess the correlation between the  
5 intention scores and psychosocial factors (social influence, beliefs about capabilities,  
6 moral norms, beliefs about consequences). We used general linear models to assess  
7 whether the intention score varied significantly from the control group to innovation  
8 group after adjusting for confounding factors. These factors were identified using the 10%  
9 change in the regression coefficient associated with the exposure variable (41, 42).  
10 However, to increase the appearance validity of the model, we constructed a separate  
11 model in which we forced age, gender and practice environment. SAS software (version  
12 9.4) was used for all statistical analyses. The empirical significance threshold (P value)  
13 was set at 0.05 in bilateral analysis.  
14  
15  
16  
17  
18  
19  
20  
21  
22

### 23 **Qualitative analysis**

24  
25 The discussion transcripts were imported into N'Vivo V.12 for analysis. Using the TDF  
26 as a guide, two researchers reviewed and agreed on codes and data were simultaneously  
27 coded using a thematic deductive approach (ADT, AGo) (43). Data were then refined into  
28 TDF domains. As the discussion occurred in French, all illustrative quotes were translated  
29 into English by a master's student (ADT) and reviewed by a scientific translator. We  
30 calculated the frequency of each barrier and facilitator by recording the number of times  
31 it was mentioned in the four group discussions (GDs 1 to 4).  
32  
33  
34  
35  
36  
37

### 38 **Triangulating quantitative and qualitative data**

39  
40 We triangulated quantitative and qualitative data to propose practical theory-driven  
41 recommendations for improving our CPD innovation (44). We compared the five  
42 psychosocial determinants measured in the CPD-Reaction questionnaire to the domains  
43 of the TDF. We observed where quantitative and qualitative data converged, where they  
44 offered additional information on the same constructs, and where they diverged. We  
45 derived recommendations using the COM-B model of behaviour (45). COM-B proposes  
46 three criteria essential for a behaviour to occur: capacity, opportunity and motivation (46).  
47 The subcategories of these criteria can be linked to the TDF domains and their associated  
48 barriers or facilitators. The COM-B also proposes nine intervention functions assigned to  
49 TDF domains that can prompt behaviour change: education, persuasion, incentivisation,  
50  
51  
52  
53  
54  
55  
56  
57  
58  
59  
60

coercion, training, restriction, environmental restructuring, modelling and enablement (31, 45, 47). Recommendations were made by identifying which of these intervention functions matched our results and then selecting relevant function-associated behaviour change techniques (45).

## RESULTS

### Recruitment and participant characteristics

We offered the 12 CPD courses (i.e. six innovation/control pairs) in each of three Canadian provinces: Quebec, Ontario and New Brunswick. Four pairs of courses were held in Quebec (two in Montreal, October 10<sup>th</sup> 2018 and October 30<sup>th</sup> 2019, and two in Quebec City, October 17<sup>th</sup> 2019 and January 29<sup>th</sup> 2019), one in Ontario (Ottawa, November 8<sup>th</sup> 2019) and one in New-Brunswick (Moncton, October 4<sup>th</sup> 2019).

**Figure 1** illustrates the flow of participants. The participation rate (ratio of users who participated in the study to those who took the training) was 71% (127/178). Forty-nine of 92 questionnaires were analysed from the innovation groups and 78 of 86 from the control groups. Most participants were under 44 years old (n=80, 63%), women (n=101, 79.5%), practised in French (n=86, 67.7%), in Quebec (n=85, 66.9%) and in an urban setting (n=100, 78.8%) (**Table 1**).

**Table 1:** Sociodemographic characteristics of the participants in innovation and control groups

|                            | TOTAL     | Innovation Group | Control Group |
|----------------------------|-----------|------------------|---------------|
| <b>No. of Participants</b> | 127       | 49               | 78            |
| <b>Age (years)*</b>        |           |                  |               |
| <44                        | 80 (63.0) | 28 (57.1)        | 52 (66.7)     |
| ≥ 45                       | 42 (33.1) | 19 (38.8)        | 23 (29.5)     |
| Missing data               | 5 (3.9)   | 2 (4.1)          | 3 (3.8)       |



**Gender\***

|              |            |           |           |
|--------------|------------|-----------|-----------|
| Women        | 101 (79.5) | 40 (81.6) | 61 (78.2) |
| Men          | 19 (15.0)  | 7 (14.3)  | 12 (15.4) |
| Missing data | 7 (5.5)    | 2 (4.1)   | 5 (6.4)   |

**Language of practice\***

|              |           |           |           |
|--------------|-----------|-----------|-----------|
| French       | 86 (67.7) | 32 (65.2) | 54 (69.2) |
| Other        | 36 (28.3) | 15 (30.6) | 21 (26.9) |
| Missing data | 5 (4.0)   | 2 (4.1)   | 3 (3.9)   |

**Province of practice**

|               |           |           |           |
|---------------|-----------|-----------|-----------|
| Quebec        | 85 (66.9) | 31 (63.2) | 54 (69.3) |
| Ontario       | 18 (14.2) | 9 (18.4)  | 9 (11.5)  |
| New Brunswick | 16 (12.6) | 7 (14.3)  | 9 (11.5)  |
| Missing data  | 8 (6.3)   | 2 (4.1)   | 6 (7.7)   |

**Practice environment\***

|              |            |           |           |
|--------------|------------|-----------|-----------|
| Urban        | 100 (78.8) | 39 (79.6) | 61 (78.2) |
| Rural        | 14 (11.0)  | 4 (8.2)   | 10 (12.8) |
| Missing data | 13 (10.2)  | 6 (12.2)  | 7 (9.0)   |

---

\*n(%)

**Quantitative results*****Feasibility***

We recruited a total of 127 participants, a 41% increase from our target of 90 participants. Collaborators and executive committee members remained involved throughout the project. We held monthly executive committee meetings as planned. Our CPD trainings



1  
2  
3 were held in the three provinces as planned. We gave 12 courses instead of the six initially  
4 planned, as additional organizations in Quebec City (n=1) and Montreal (n=2) showed  
5 interest. Due to time constraints imposed by CME settings, completing 1.5 hours (45-min  
6 course, 15-min evaluation and 30-min discussion) in all settings was not possible, therefore  
7 we held the group discussions in only two out of the six settings (Montreal and Ottawa).  
8  
9

### 10 ***Behavioural Intention***

11  
12  
13  
14  
15 The innovation aims to influence behaviour by modifying intention and its psychosocial  
16 determinants. For example, the innovation could change beliefs about capabilities (or  
17 confidence), by increasing health professionals' knowledge about the desired behavior.  
18 **Table 2** shows scores for intention and its psychosocial determinants for innovation and  
19 control groups as evaluated using the CPD-Reaction questionnaire. Mean difference  
20 between innovation and control scores for the four psychosocial determinants of behaviour  
21 change influencing intention were: MD=0.16 for social influence (95% CI: -0.26, 0.58),  
22 MD=0.63 for belief about capabilities (95% CI: 0.21, 1.06), MD=0.25 for moral norm  
23 (95% CI: -0.21, 0.72) and MD=0.22 for belief about consequences (95% CI: -0.23, 0.67).  
24 The mean intention score for including sex and gender considerations in patient care was  
25 higher in the innovation than in the control group, i.e. 5.65 ( $\pm$  0.19) versus 5.19 ( $\pm$ 0.15), on  
26 a scale from 1 (low) to 7 (high). The mean difference between the two groups was -0.47  
27 (95% CI: -0.95, 0.01), with a p-value of 0.06 (**Supplementary table 1**). No statistically  
28 significant differences were observed for the remaining four psychosocial determinants.  
29 Bivariate analysis showed that the higher median for intention was significantly associated  
30 with age over 45 (p=0.03) and a rural practice environment (p=0.02) (**Supplementary**  
31 **table 1**). After adjusting for age, gender and practice environment, the mean difference in  
32 intention between the two groups was statistically significant: -0.57 (95% CI: -1.09, -0.05),  
33 with a p-value of 0.03 (**Table 3**).  
34  
35  
36  
37  
38  
39  
40  
41  
42  
43  
44  
45  
46  
47

48 **Table 2:** CPD-Reaction questionnaire mean scores  
49

|                     | Total | Innovation | Control | Difference<br>(95% CI) |
|---------------------|-------|------------|---------|------------------------|
| No. of participants | 127   | 49         | 78      | -                      |

| <b>Psychosocial determinants – score range (1 to 7)*</b> |                   |                   |                   |                     |
|----------------------------------------------------------|-------------------|-------------------|-------------------|---------------------|
| Social influence                                         | 4.62 (4.42; 4.83) | 4.72 (4.44; 5,00) | 4.56 (4.27; 4.85) | 0.16 (-0.26; 0.58 ) |
| Beliefs about capabilities                               | 5.1 (4.90; 5.33)  | 5.50 (5.27; 5.74) | 4.87 (4.56; 5.17) | 0.63 (0.21; 1.06)   |
| Moral norm                                               | 5.90 (5.69; 6.13) | 6.06 (5.80; 6.32) | 5.81 (5.48; 6.14) | 0.25 (-0.21; 0.72)  |
| Beliefs about consequences                               | 5.68 (5.46; 5.90) | 5.82 (5.52; 6.11) | 5.60 (5.28; 5.91) | 0.22 (-0.23; 0.67)  |
| <b>Intention*</b>                                        | 5.37 (5.13; 5.60) | 5.65 (5.36; 5.95) | 5.19 (4.85; 5.52) | 0.47 (-0.01; 0.95)  |

\*Mean (95% CI) ;

**Table 3:** Mean difference of the intention score between innovation and control groups

|            | <b>Model 1*</b>       |                | <b>Model 2†</b>        |                | <b>Model 3‡</b>        |                |
|------------|-----------------------|----------------|------------------------|----------------|------------------------|----------------|
|            | <b>β (95% CI)</b>     | <b>P Value</b> | <b>β (95% CI)</b>      | <b>P Value</b> | <b>β (95% IC)</b>      | <b>P Value</b> |
| Control    | Reference             |                | Reference              |                | Reference              |                |
| Innovation | -0.47<br>(-0.95;0.01) | <b>0.057</b>   | -0.61<br>(-1.10;-0.12) | <b>0.015</b>   | -0.57<br>(-1.09;-0.05) | <b>0.031</b>   |

95% CI, confidence interval at 95%;

\*Non-adjusted;

†Adjusted for age and gender;

‡Adjusted for age, gender and environment of practice.

### Qualitative findings

Due to time constraints imposed by CME settings, we held the group discussions in two out of the six settings, Montreal, October 30<sup>th</sup> 2019 and Ottawa, November 8<sup>th</sup> 2019. Thus

four semi-structured group discussions (GD1, GD2, GD3, GD4) were conducted and 67 health professionals participated, reporting a variety of barriers and facilitators (**Table 4**).

**Table 4:** Mapping facilitators and barriers to the Theoretical Domains Framework (TDF) with illustrative quotes and frequencies

| TDF DOMAIN                        | FACILITATOR/ BARRIER                                                                                   | ILLUSTRATIVE QUOTES*                                                                                                                                                                                                                                                                                                                                                                  | FREQUENCIES** (N=4 groups) |
|-----------------------------------|--------------------------------------------------------------------------------------------------------|---------------------------------------------------------------------------------------------------------------------------------------------------------------------------------------------------------------------------------------------------------------------------------------------------------------------------------------------------------------------------------------|----------------------------|
| <b>Skills</b>                     | The health professional acknowledges different treatment methods by gender (Facilitator)               | “Dominique, is that a man or a woman? ... Because they are probably not treated the same” (GD4)                                                                                                                                                                                                                                                                                       | 4                          |
|                                   | The health professional acknowledges different clinical representation by gender (Facilitator)         | “...I work as a nurse in cardiac and pulmonary rehabilitation, and ... it is a fact, that women come less [to rehabilitation programs] in general than men. Women often will quit [rehabilitation] or they won't come because they're taking care of everyone. But something happens [illness] and then they don't have time to take care of themselves, because it's too much” (GD3) | 1                          |
|                                   | The health professional assumed the gender of the patient when analyzing a clinical vignette (Barrier) | “I assumed that it was a guy” (GD3) / “I presumed that it was a girl!” (GD4)                                                                                                                                                                                                                                                                                                          | 3                          |
| <b>Beliefs about Capabilities</b> | The health professional feels he/she can accurately observe the phenotype of the patient (Facilitator) | “At the first contact we have with a patient ... we see the phenotype there without talking about gender, it's one of the things that jumps out at you when you're taking notes.” (GD3)                                                                                                                                                                                               | 3                          |
| <b>Social influences</b>          | The health professionals assume the patient's gender based on his/her societal role (Barrier)          | “I heard ‘civil servant’, I don't know, in my head I was like ‘civil servant’, so it's a man.” (GD4)                                                                                                                                                                                                                                                                                  | 3                          |
| <b>Knowledge</b>                  | The health professional knows the differences between sex and gender in scientific                     | “Yes, that's it actually, the biological aspect you certainly take into account in the study, but we are talking about the [social] categories of sex and gender... And                                                                                                                                                                                                               | 2                          |

|                                            |                                                                                                                                                                    |                                                                                                                                                                                                                                                                                                                                                                                                                                                                |        |
|--------------------------------------------|--------------------------------------------------------------------------------------------------------------------------------------------------------------------|----------------------------------------------------------------------------------------------------------------------------------------------------------------------------------------------------------------------------------------------------------------------------------------------------------------------------------------------------------------------------------------------------------------------------------------------------------------|--------|
|                                            | literature (Facilitator)                                                                                                                                           | menopause, and on the other hand [there's] also andropause" (GD2)                                                                                                                                                                                                                                                                                                                                                                                              |        |
|                                            | The health professional did not ask the gender of the patient when analyzing a clinical vignette (Barrier)                                                         | "Well, I don't know why we didn't note it [the gender of the patient], I don't have the answer to that. But ... when we talk about the clinical context it is systemically noted in the first ... sentence, in the first two words [of notes documenting a consultation]. It's hard to say that we ignore it [gender of the patient]. We didn't notice it here, but in clinical practice, have you ever met a patient without identifying their gender?" (GD3) | 2<br>1 |
|                                            | The health professional is not aware of the concepts of sex and gender when analyzing a clinical vignette (Barrier)                                                | "...but in the seminar, there was no emphasis on that, so it didn't jump out at us," (GD3)                                                                                                                                                                                                                                                                                                                                                                     |        |
| <b>Beliefs about Consequences</b>          | The health professional mentions that they would not change their therapeutic approach according to the patient's gender (Barrier)                                 | "I would say that I didn't see the need to know if it was a man or a woman...I never asked myself the question..." (GD1)                                                                                                                                                                                                                                                                                                                                       | 2      |
| <b>Environmental Context and Resources</b> | The patient's sex is routinely recorded in medical notes (Facilitator)                                                                                             | "... in the clinical context it's [the sex of the patient] systematically noted in the first lines in every consultation. In the first sentence, in the first two words. It's hard to say that we ignore it." (GD3)                                                                                                                                                                                                                                            | 2      |
|                                            | The androcentric nature of the French language (the use of masculine generic language to refer to men and women, as well as other gender representation) (Barrier) | "In French everything is masculine until you know, like in the room here [mostly women participants] we'll say like "ils ont fait ça" [ <i>ils</i> is a masculine pronoun] because you are the only men, but..." [generalizing to the masculine pronoun] (GD3) / "The language doesn't help ... [to differentiate between men and women]." (GD3)                                                                                                               | 1      |
|                                            | The healthcare professional perceives that the language used by                                                                                                    | "Well it's about when you say 'our diabetes' and 'your depression', if it had been a woman would we have said the same thing?... 'your depression' 'our diabetes'..." (GD2)                                                                                                                                                                                                                                                                                    | 1      |

|                                                 |                                                                                                                                               |                                                                                                                                                                                                              |   |
|-------------------------------------------------|-----------------------------------------------------------------------------------------------------------------------------------------------|--------------------------------------------------------------------------------------------------------------------------------------------------------------------------------------------------------------|---|
|                                                 | physicians towards a patient may be different according to sex and gender (Barrier)                                                           | [referring to the bias in the language to describe 'your' depression versus 'our' diabetes]                                                                                                                  |   |
| <b>Social/Professional Role and Identity</b>    | The health professional reflects positively on his/her relationship with the patient (Facilitator)                                            | "I work in an exclusively white environment, and I am the only black person, and I have no problem whether [the patient] is male, female or a child" (GD3)                                                   | 1 |
| <b>Intentions</b>                               | The health professional has the intention to change his/her therapeutic approach by considering the differences of gender (Facilitator)       | "With the information that I have here [clinical description of vignette], if I had 'menopausal woman', then I think I would have researched more, but with what I had here, I didn't [see the need]." (GD4) | 1 |
|                                                 | The health professional does not have the intention to change his/her therapeutic approach by considering the differences of gender (Barrier) | "With what I have here [descriptive information of the clinical vignette], I am not sure to what extent I would have changed my approach" (GD4)                                                              | 1 |
| <b>Goals</b>                                    | The health professional does not perceive the integration of the concepts of sex and gender in clinical practice as a priority (Barrier)      | "It wasn't important ... the most important, [but] that doesn't mean that [the lack of sex and gender consideration in the clinical vignette] wasn't perceived" (GD4)                                        | 1 |
| <b>Memory, Attention and Decision Processes</b> | The health professional does not consider that sex and gender are necessary parts of the decision-making process (Barrier)                    | "If it is not obvious, we are not inclined to do it... [take into consideration the sex and gender of the patient]" (GD2)                                                                                    | 1 |

\*Free translation from French

\*\*The number of times that the barrier/facilitator appeared in the transcript

### ***Barriers and facilitators mapped to the TDF domains***

Ten barriers mapped to nine of the 14 TDF domains and seven facilitators mapped onto six of the domains. The most frequent barriers were related to Skills (e.g. failing to consider a

1  
2  
3 patient's gender) (n=3) and to Social Influence (e.g. making gender assumptions about  
4 employment) (n=3). The most frequent facilitators were also related to Skills (n=4) (**Table**  
5 **4**).  
6  
7

8  
9 We mapped to the Skills domain when the participants asked whether their patient was a  
10 woman or man before analyzing the clinical vignette, or else failed to ask the question (the  
11 fictive name of the patient – Dominique – was strategically ambiguous). Thus, failure to  
12 ask was coded as a barrier, and asking was coded as a facilitator. Discussion about  
13 information on sex and/or gender was coded as a facilitator in the Knowledge domain, but  
14 reporting differentiating between women and men patients in clinical practice was coded  
15 as a facilitator in the Skills domain. When participants reported not needing to know the  
16 patient's gender because this information would not have changed their intervention, we  
17 mapped the barrier to Beliefs about consequences domain. Participants documented some  
18 differences between men and women patients in their clinical practice, demonstrating  
19 ability acquired through practice to include sex and gender considerations. Participants also  
20 reported they did not ask the sex of the patient in the clinical vignette as they automatically  
21 observe a patient's sex in practice, so didn't feel the need to mention it in this context. This  
22 facilitator was mapped to the domain beliefs about capabilities (n=3). Some participants  
23 reported that they routinely observe and record a patient's sex when taking notes. This  
24 facilitator was mapped to the domain environmental context and resources, since it this is  
25 an institutional practice reflecting an organisational clinical culture, and could foster  
26 further awareness and consideration of sex and gender (**Table 4**).  
27  
28  
29  
30  
31  
32  
33  
34  
35  
36  
37  
38  
39  
40

### 41 **Triangulation**

42  
43 CPD-Reaction psychosocial variables matched barriers that mapped onto to the TDF  
44 domains beliefs about consequences, social influence and intentions. CPD-Reaction  
45 psychosocial variables also matched facilitators that mapped onto to the TDF domains  
46 beliefs about capabilities and intentions. We identified six additional psychosocial  
47 variables from the TDF: knowledge, skills, goal, memory, attention and decision processes,  
48 environmental context and resources, social/professional role and identity. Results of  
49 triangulation were summarised with consequent recommendations (**Supplementary table**  
50 **2**). Recommendations for improving the CPD training were based on behaviour change  
51  
52  
53  
54  
55  
56  
57  
58  
59  
60

1  
2  
3 techniques associated with the following functions: modelling, training, environmental  
4 restructuring, enablement, education and goal settings (**Supplementary table 2**) (45).  
5 Training (n=5) and education (n=4) were the most frequent functions used in the  
6 recommendations.  
7  
8  
9

## 10 **DISCUSSION**

11  
12  
13 We assessed the feasibility and impact of including sex and gender considerations in a CPD  
14 course on T2D and depression care on health professionals' intention to include sex and  
15 gender considerations in patient care. Recruited CPD organisations, collaborators and  
16 patient-partners stayed engaged throughout the study. All planned activities occurred and  
17 71% of targeted health professionals participated. The intention to include sex and gender  
18 considerations in patient care was higher in the innovation group, and statistically  
19 significant when controlling for age, gender, and practice sites. Barriers were mostly  
20 related to skills and social influence and facilitators to skills and beliefs about capabilities.  
21 We triangulated results and produced recommendations for improving the CPD course.  
22 The following observations could enable CPD organisations to systematically improve  
23 CPD by integrating sex and gender considerations into their existing material.  
24  
25  
26  
27  
28  
29  
30  
31

32  
33 First, all our predetermined feasibility criteria were met. In fact, due to increased interest  
34 in the topic, we recruited more participants and gave more CPD activities than planned.  
35 Recruitment may also have improved because we involved stakeholders early on in the  
36 research process, including in applying for the grant. Early engagement of stakeholders has  
37 been associated elsewhere with more successful recruitment (48). Therefore, elements that  
38 should be considered when designing similar CPD activities include, but are not limited to:  
39 1) successful collaboration and co-creation with CPD organisations early on including  
40 during grant writing, 2) offering CME accreditation for the CPD activities, 3) the duration  
41 of the training, and 4) the evidence base relevant to the clinical topic (49).  
42  
43  
44  
45  
46  
47  
48

49 Second, the CPD course that included sex and gender considerations increased health  
50 professionals' intention to include sex and gender considerations in patients' care. This  
51 may suggest a significant knowledge gap among participants. Studies show that health  
52 professionals lack knowledge of sex and gender differences in disease manifestation and  
53 outcomes and fail to recognize the gender constraints that their patients face (50-53). For  
54  
55  
56  
57  
58  
59  
60



1  
2  
3 example, in a cross-sectional survey of physicians (71% male), 55% said that the medical  
4 curriculum did not adequately prepare them for dealing with sexual health problems,  
5 particularly those of female patients (50). In another study, only 49% of primary care  
6 physicians (n=200, 65% male) and 59% of cardiologists (n=100, 85% male) reported that  
7 their training prepared them to assess female patients' cardiovascular risk (52). Our study  
8 represents a promising avenue for rectifying these gaps. Furthermore, bivariate analyses of  
9 the between-group difference in the intention scores yielded significant results in older, but  
10 not younger, participants and in those practising in rural area. Their age and geographical  
11 isolation perhaps reduced their exposure to sex and gender issues, which have only been  
12 included in medical curricula since they qualified (53). They may also have less access to  
13 CPD training due to isolation, poor technological resources, low financial support (54, 55)  
14 and geographical variations in medical practice styles (56, 57). Future studies could further  
15 investigate the perceptions of health professionals in rural settings on age and gender. They  
16 could also document if patients experience geographical differences in care regarding sex  
17 and gender. Training could target older and rural health professionals, who seemed more  
18 open to modifying their clinical practice.  
19  
20  
21  
22  
23  
24  
25  
26  
27  
28  
29  
30

31 Third, beliefs about capabilities as a facilitator showed the strongest mean difference  
32 between the innovation and control groups. These results are consistent with a literature  
33 review of 277 studies showing that the mechanisms of action most frequently associated  
34 with behaviour change techniques are beliefs about capabilities and intention (58). Adding  
35 a practical component to the CPD course could strengthen beliefs about capabilities. Also,  
36 several barriers and facilitators to considering sex and gender in patient care were  
37 identified. Our qualitative analysis showed that participants did not consider integrating  
38 sex and gender into clinical practice as a priority, with social influences emerging as an  
39 important barrier. The social influence score as measured by CPD-Reaction also showed  
40 the lowest impact (MD=0.16), suggesting that the training did not address this factor (Table  
41 2). A CPD course could offer a reflective segment on how social influence could be  
42 affecting their clinical practice (57, 59). Furthermore, belief about consequences had one  
43 of the lowest MD (0.22) of the five psychosocial determinants, and one associated barrier  
44 (n=2). This could be remedied by focusing more on the consequences of not integrating  
45 sex and gender into clinical practice (51).  
46  
47  
48  
49  
50  
51  
52  
53  
54  
55  
56  
57  
58  
59  
60



1  
2  
3 Finally, in spite of the low priority given to sex and gender by our participants, qualitative  
4 analysis demonstrated that opportunities already exist for integrating these considerations  
5 into practice, such as the routine documenting of the patient's sex. CPD strategies could  
6 make more of these opportunities (60). For example, CPD activities could advocate for  
7 sex- and gender-equitable care when treating men and women for diabetes and depression.  
8 Indeed, specific attention could be given to diabetic foot care when treating men, while  
9 specific attention could be given to blood-glucose regulation and to family and lifestyle  
10 issues when treating women (7, 61).  
11

12 This innovation could be adapted to medical fields other than T2D and depression, and to  
13 other countries and areas outside French-speaking provinces of Canada. While many of the  
14 barriers participants mentioned were culture- and language-specific to the Quebec or  
15 francophone context, many other languages (e.g. Spanish, German, Italian, and  
16 Portuguese) also generalise everything to the masculine gender, suggesting shared  
17 linguistic barriers. However, each culture has highly specific sex and gender norms  
18 affecting physicians' clinical assumptions (62). Our qualitative results highlight the fact  
19 that CPD on sex and gender considerations must be tailored to specific cultural contexts  
20 (17) and incorporate sex- and gender-based analysis tools (63).  
21

22 Our study has a few limitations. As we used a single post-intervention measure, we cannot  
23 attribute the difference between the two groups solely to the innovation. However, our  
24 analysis suggests that those who completed the innovation increased their intention, as well  
25 as increasing all four psychosocial predictors, suggesting an association with the  
26 innovation. Second, the fact that participants could choose which course to attend  
27 (according to conference guidelines), and hence the non-randomized nature of the study,  
28 may have biased our feasibility findings. Also, the training was given by teachers of  
29 different genders for the innovation and control groups (a woman in the innovation group  
30 and a man in the control group). As a bias could have been introduced owing to differences  
31 in communication styles between men and women, the teaching teams practised the courses  
32 several times to ensure that teaching methods were equivalent. In addition, we ensured the  
33 teachers stayed with their respective groups for the six data collections. Also, due to ethics  
34 guidelines, we only analysed questionnaires completed by participants who had also signed  
35  
36  
37  
38  
39  
40  
41  
42  
43  
44  
45  
46  
47  
48  
49  
50  
51  
52  
53  
54  
55  
56  
57  
58  
59  
60

1  
2  
3 consent forms. Although the human resources for both groups were the same (trainer,  
4 research-assistant and patient-partners), the control group had an extra team member,  
5 resulting in unequal numbers of participants who signed consent in each group. The  
6 presence of this extra member could also explain the difference in the number of  
7 questionnaires collected in the two groups.  
8  
9

10  
11  
12 While there is evidence that intention is an effective determinant for measuring behaviour  
13 change (39), it is limited as a proxy. Finding other reliable measures of behaviour change  
14 is challenging (64). However, identifying barriers and facilitators to change is a first step  
15 (64). Semi-structured group discussions using a clinical vignette have also been shown to  
16 contribute to clinical behaviour change (64). Methods such as audit and feedback, as well  
17 as “commitment to change statements” could reduce the intention-behaviour gap and  
18 strengthen the understanding of clinical changes following CPD activities (65, 66).  
19  
20  
21

22  
23  
24  
25 Lastly, our discussion groups attracted many participants, limiting both participants’  
26 opportunity to speak and the depth of the discussion. Our mixed-methods approach is a  
27 strength of this study and our findings support the feasibility of a randomised trial informed  
28 by identified barriers and facilitators.  
29  
30  
31

## 32 33 **CONCLUSION**

34  
35 A CPD course with sex and gender considerations is feasible and well received by health  
36 professionals. The significant between-group difference in the intention scores suggests the  
37 innovation had a favorable impact on health professionals’ intention to include sex and  
38 gender considerations when caring for their patients with T2D and depression. However,  
39 caution is required as this effect may be attributed to other sources given the non-  
40 randomised nature of our study. Future randomised controlled trials are needed to control  
41 for potential selection biases and confirm our results, accounting for barriers and  
42 facilitators in sex- and gender-adapted diabetes and depression care. Our findings will  
43 inform future CPD initiatives that address this and other inequities in health care pertaining  
44 to sex and gender.  
45  
46  
47  
48  
49  
50  
51

## 52 53 54 55 **Figure Legend**

1  
2  
3 **Figure 1:** Flowchart of participants  
4

5 \*This is an approximate figure given the changing dynamics of the hospital's professional  
6 environment; an email was sent to 2000 employees including healthcare professionals,  
7 others were invited using posters in the training sites, oral communication at a meeting  
8 with the organizing team of the clinical setting, and announcements in Médecins  
9 francophones du Canada's conference calendar.  
10  
11  
12  
13  
14  
15  
16  
17  
18  
19  
20  
21  
22  
23  
24  
25  
26  
27  
28  
29  
30  
31  
32  
33  
34  
35  
36  
37  
38  
39  
40  
41  
42  
43  
44  
45  
46  
47  
48  
49  
50  
51  
52  
53

54 **Acknowledgements**  
55  
56  
57  
58  
59  
60

1  
2  
3 We thank the members of the mATrICES-F Group for their involvement in this project.  
4 We also thank Louisa Blair for editing this manuscript.  
5  
6

7 **Collaborators mATrICES-F Group:**  
8

9 Alèxe Deom Tardif, Université Laval  
10

11 Amédé Gogovor, Université Laval  
12

13 André Bilodeau, McGill University  
14

15 André Bussièrès, McGill University  
16

17 André Gaudreau, Patient-partner  
18

19 Audrey Ferron Parayre, University of Ottawa  
20

21 Caroline Jose, Université de Moncton  
22

23 Danièle Remy-Lamarche, Patient-partner  
24

25 Dawn Stacey, University of Ottawa  
26

27 Denis Audet, University Family Medicine Group Saint-François-d'Assise  
28

29 Denis Prud'homme, Université de Moncton  
30

31 France Légaré, Université Laval  
32

33 Francine Borduas, Médecins francophones du Canada  
34

35 Gerard Ngueta, VITAM – Centre de recherche en santé durable  
36

37 Geneviève Roch, Université Laval  
38

39 Hélène Lee-Gosselin, Université Laval  
40

41 Isabelle Auclair, Université Laval  
42

43 Laurie Laplanche, Université Laval  
44

45 Luc Vigneault, Patient-partner  
46

47 Maman Joyce Dogba, Université Laval  
48  
49  
50  
51  
52  
53  
54  
55  
56  
57  
58  
59  
60

1  
2  
3 Marie-Claude Tremblay, Université Laval  
4

5 Marie-Pierre Gagnon, Université Laval  
6

7  
8 Nicole Parent, Médecins francophones du Canada  
9

10 Sabrina Guay-Bélanger, VITAM – Centre de recherche en santé durable  
11

12 Sophie Desroches, Université Laval  
13

14 Valérie Borde, Centre DECLIC  
15

### 16 17 **Contributors** 18

19  
20 ADT, AGo, SGB, FL, NP and AB conceived and designed the study. ADT, AGo, SGB,  
21 DA, AGa, DRL, LV and FL participated to data collection. ADT, AGo, SGB, GN and FL  
22 participated to data analysis. All authors critically revised the interpretation of data. ADT,  
23 AGo, SGB and FL drafted the manuscript. All authors and members of the mATrICES-  
24 F Group read, provided feedback and approved the final manuscript.  
25  
26  
27  
28

### 29 **Funding** 30

31 This work was supported by the Canadian Institutes of Health Research, grant number  
32 201702IGK-384530-IGK-CFBA-19158. AGo is funded by a CIHR Patient-Oriented  
33 Research fellowship. FL holds a Tier 1 Canada Research Chair in Shared Decision Making  
34 and Knowledge Translation.  
35  
36  
37  
38

### 39 **Disclaimer** 40

41 The findings and views are those of the authors.  
42  
43

### 44 **Competing interests** 45

46 None declared.  
47  
48

### 49 **Patient consent for publication** 50

51 Not applicable.  
52  
53

### 54 **Ethics approval** 55 56 57 58 59 60

Centre intégré universitaire de santé et de services sociaux de la Capitale-Nationale (CIUSSS-CN) Ethics Board (2017-2018-16 MP), the Hôpital Montfort Research ethics board (19-20-05-009), Vitalité health network research ethics board (CER-2019-18).

### **Provenance and peer review**

Not commissioned; externally peer reviewed.

### **Patient consent for publication**

Not required.

### **Data sharing statement**

Data are available upon reasonable request.

### **References**

1. Clayton JA, Tannenbaum C. Reporting Sex, Gender, or Both in Clinical Research? JAMA. 2016;316(18):1863.
2. Institut de recherche en santé du Canada. Comment intégrer le sexe et le genre à la recherche 2019 [Available from: <http://cihr-irsc.gc.ca/f/50836.html>].
3. Johnson JL, Greaves L, Repta R. Better science with sex and gender: Facilitating the use of a sex and gender-based analysis in health research. International Journal for Equity in Health. 2009;8(1):14.
4. Oliffe J, Greaves L. Designing and Conducting Gender, Sex, and Health Research. Thousand Oaks, California 2012. Available from: <http://sk.sagepub.com/books/designing-and-conducting-gender-sex-and-health-research>.
5. Légaré F, Lee-Gosselin H, Borduas F, Monette C, Bilodeau A, Tanguay D, et al. Approaches to considering sex and gender in continuous professional development for health and social care professionals: An emerging paradigm. Medical Teacher. 2018;40(9):875-9.
6. Tannenbaum C, Ellis RP, Eyssel F, Zou J, Schiebinger L. Sex and gender analysis improves science and engineering. Nature. 2019;575(7781):137-46.
7. Kautzky-Willer A, Harreiter J, Pacini G. Sex and Gender Differences in Risk, Pathophysiology and Complications of Type 2 Diabetes Mellitus. Endocrine Reviews. 2016;37(3):278-316.
8. Geary N. Counterpoint: physiologists should not distinguish “sex” and “gender”. American Journal of Physiology-Regulatory, Integrative and Comparative Physiology. 2010;298(6):R1702-R4.

- 1  
2  
3 9. Demmer RT, Gelb S, Suglia SF, Keyes KM, Aiello AE, Colombo PC, et al. Sex  
4 Differences in the Association Between Depression, Anxiety, and Type 2 Diabetes  
5 Mellitus. 2015;77(4):467-77.
- 6  
7 10. Kuehner C. Why is depression more common among women than among men?  
8 *Lancet Psychiatry*. 2017;4(2):146-58.
- 9  
10 11. Turecki G, Brent DA. Suicide and suicidal behaviour. *The Lancet*.  
11 2016;387(10024):1227-39.
- 12  
13 12. Zhuang QS, Shen L, Ji HF. Quantitative assessment of the bidirectional  
14 relationships between diabetes and depression. *Oncotarget*. 2017;8(14):23389-400.
- 15  
16 13. Ali S, Stone MA, Peters JL, Davies MJ, Khunti K. The prevalence of co-morbid  
17 depression in adults with Type 2 diabetes: a systematic review and meta-analysis.  
18 *Diabetic Medicine*. 2006;23(11):1165-73.
- 19  
20 14. Ahmad A, Abujbara M, Jaddou H, Younes NA, Ajlouni K. Anxiety and  
21 Depression Among Adult Patients With Diabetic Foot: Prevalence and Associated  
22 Factors. *Journal of clinical medicine research*. 2018;10(5):411-8.
- 23  
24 15. Toker S, Shirom A, Melamed S. Depression and the metabolic syndrome: gender-  
25 dependent associations. *Depression and anxiety*. 2008;25(8):661-9.
- 26  
27 16. Möller-Leimkühler AM. Gender differences in cardiovascular disease and  
28 comorbid depression. *Dialogues in clinical neuroscience*. 2007;9(1):71-83.
- 29  
30 17. Coen S BE. What a Difference Sex and Gender Make: A gender, Sex and Health  
31 Research Casebook. Vancouver; 2012.
- 32  
33 18. Gilbert-Ouimet M, Trudel X, Aubé K, Ndjaboue R, Duchaine C, Blanchette C, et  
34 al. Differences between women and men in the relationship between psychosocial  
35 stressors at work and work absence due to mental health problem. *Occupational and  
36 Environmental Medicine*. 2020;77(9):603-10.
- 37  
38 19. Deischer C, Dervic E, Leutner M, Kosi-Trebotic L, Klimek P, Kautzky A, et  
39 al. Diabetes mellitus is associated with a higher risk for major depressive disorder in  
40 women than in men. *BMJ Open Diabetes Research & Care*. 2020;8(1):e001430.
- 41  
42 20. Tannenbaum C, Greaves L, Graham ID. Why sex and gender matter in  
43 implementation research. *BMC Medical Research Methodology*. 2016;16(1).
- 44  
45 21. Tannenbaum C, Clow B, Haworth-Brockman M, Voss P. Sex and gender  
46 considerations in Canadian clinical practice guidelines: a systematic review. *CMAJ  
47 Open*. 2017;5(1):E66-E73.
- 48  
49 22. Ferlie EB, Shortell SM. Improving the quality of health care in the United  
50 Kingdom and the United States: a framework for change. *Milbank Q*. 2001;79(2):281-  
51 315.
- 52  
53 23. Davis D, Evans M, Jadad A, Perrier L, Rath D, Ryan D, et al. The case for  
54 knowledge translation: shortening the journey from evidence to effect. *Bmj*.  
55 2003;327(7405):33-5.
- 56  
57 24. Davis D, Galbraith R. Continuing Medical Education Effect on Practice  
58 Performance. *Chest*. 2009;135(3):42S-8S.
- 59  
60 25. Institute of Medicine. Redesigning Continuing Education in the Health  
Professions. Washington, DC: The National Academies Press; 2010. 296 p.
26. Godin G. Les comportements dans le domaine de la santé : Comprendre pour  
mieux intervenir. Montréal, Québec: Les Presses de l'Université de Montréal 2012.



- 1
- 2
- 3
- 4 27. Ajzen I. The theory of planned behavior. *Organizational Behavior and Human Decision Processes*. 1991;50(2):179-211.
- 5
- 6 28. Légaré F, Borduas F, Freitas A, Turcotte S. User Manual – The Continuing Professional Development (CPD) Reaction Questionnaire. 2015.
- 7
- 8 29. Atkins L, Francis J, Islam R, O'Connor D, Patey A, Ivers N, et al. A guide to using the Theoretical Domains Framework of behaviour change to investigate implementation problems. *Implementation Science*. 2017;12(1).
- 9
- 10 30. Cane J, O'Connor D, Michie S. Validation of the theoretical domains framework for use in behaviour change and implementation research. *Implementation Science*. 2012;7(1):37.
- 11
- 12 31. Michie S, van Stralen MM, West R. The behaviour change wheel: A new method for characterising and designing behaviour change interventions. *Implementation Science*. 2011;6(1):42.
- 13
- 14 32. Eldridge SM, Chan CL, Campbell MJ, Bond CM, Hopewell S, Thabane L, et al. CONSORT 2010 statement: extension to randomised pilot and feasibility trials. *BMJ*. 2016;355:i5239.
- 15
- 16 33. Gogovor A MT, Etherington N, Colantonio A, Légaré F, on behalf of the GIKT Group. Sex and gender analysis in knowledge translation interventions: challenges and solutions. *Health Research Policy and Systems*. 2020;18(1):108.
- 17
- 18 34. Atlantis E, Fahey P, Foster J. Collaborative care for comorbid depression and diabetes: a systematic review and meta-analysis. *BMJ Open*. 2014;4(4):e004706.
- 19
- 20 35. Holt RI, de Groot M, Golden SH. Diabetes and depression. *Curr Diab Rep*. 2014;14(6):491.
- 21
- 22 36. Harreiter J, Fadl H, Kautzky-Willer A, Simmons D. Do Women with Diabetes Need More Intensive Action for Cardiovascular Reduction than Men with Diabetes? *Current diabetes reports*. 2020;20(11):61.
- 23
- 24 37. Légaré F, Freitas A, Turcotte S, Borduas F, Jacques A, Luconi F, et al. Responsiveness of a simple tool for assessing change in behavioral intention after continuing professional development activities. *PLOS ONE*. 2017;12(5):e0176678.
- 25
- 26 38. Légaré F, Borduas F, Freitas A, Jacques A, Godin G, Luconi F, et al. Development of a Simple 12-Item Theory-Based Instrument to Assess the Impact of Continuing Professional Development on Clinical Behavioral Intentions. *PLoS ONE*. 2014;9(3):e91013.
- 27
- 28 39. Godin G, Bélanger-Gravel A, Eccles M, Grimshaw J. Healthcare professionals' intentions and behaviours: A systematic review of studies based on social cognitive theories. *Implementation Science*. 2008;3(1):36.
- 29
- 30 40. Michie S. Making psychological theory useful for implementing evidence based practice: a consensus approach. *Quality and Safety in Health Care*. 2005;14(1):26-33.
- 31
- 32 41. Mickey R M GS. The Impact of Confounder Selection Criteria on Effect Estimation *American Journal of Epidemiology*. 1989;129(1):125-37.
- 33
- 34 42. Budtz-Jørgensen E, Keiding N, Grandjean P, Weihe P. Confounder selection in environmental epidemiology: assessment of health effects of prenatal mercury exposure. *Ann Epidemiol*. 2007;17(1):27-35.
- 35
- 36 43. Atkins L, Francis J, Islam R, O'Connor D, Patey A, Ivers N, et al. A guide to using the Theoretical Domains Framework of behaviour change to investigate implementation problems. *Implement Sci*. 2017;12(1):77.
- 37
- 38
- 39
- 40
- 41
- 42
- 43
- 44
- 45
- 46
- 47
- 48
- 49
- 50
- 51
- 52
- 53
- 54
- 55
- 56
- 57
- 58
- 59
- 60



- 1  
2  
3  
4  
5  
6  
7  
8  
9  
10  
11  
12  
13  
14  
15  
16  
17  
18  
19  
20  
21  
22  
23  
24  
25  
26  
27  
28  
29  
30  
31  
32  
33  
34  
35  
36  
37  
38  
39  
40  
41  
42  
43  
44  
45  
46  
47  
48  
49  
50  
51  
52  
53  
54  
55  
56  
57  
58  
59  
60
44. O'Cathain A, Murphy E, Nicholl J. Three techniques for integrating data in mixed methods studies. *Bmj*. 2010;341:c4587.
  45. Michie S, Atkins L, R. W. The behaviour change wheel : a guide to designing Interventions. Great Britain: Silverback Publishing; 2014.
  46. West R, Michie S. A brief introduction to the COM-B Model of behaviour and the PRIME Theory of motivation. *Qeios*. 2020.
  47. Agbadjé TT, Menear M, Dugas M, Gagnon M-P, Rahimi SA, Robitaille H, et al. Pregnant women's views on how to promote the use of a decision aid for Down syndrome prenatal screening: a theory-informed qualitative study. *BMC Health Services Research*. 2018;18(1).
  48. Garvelink MM, Freitas A, Menear M, Brière N, Stacey D, Légaré F. In for a penny, in for a pound: the effect of pre-engaging healthcare organizations on their subsequent participation in trials. *BMC Research Notes*. 2015;8(1):751.
  49. Little P, Hayes S. Continuing professional development (CPD): GPs' perceptions of post-graduate education-approved (PGEA) meetings and personal professional development plans (PDPs). 2003;20(2):192-8.
  50. Veloshnee G, Loveday P-K. Gender biases and discrimination: a review of health care interpersonal interactions 2007 [Available from: [https://www.who.int/social\\_determinants/resources/gender\\_biases\\_and\\_discrimination\\_wgkn\\_2007.pdf](https://www.who.int/social_determinants/resources/gender_biases_and_discrimination_wgkn_2007.pdf)].
  51. Mauvais-Jarvis F, Bairey Merz N, Barnes PJ, Brinton RD, Carrero J-J, Demeo DL, et al. Sex and gender: modifiers of health, disease, and medicine. *The Lancet*. 2020;396(10250):565-82.
  52. Bairey Merz CN, Andersen H, Sprague E, Burns A, Keida M, Walsh MN, et al. Knowledge, Attitudes, and Beliefs Regarding Cardiovascular Disease in Women: The Women's Heart Alliance. *J Am Coll Cardiol*. 2017;70(2):123-32.
  53. Kling JM, Rose SH, Kransdorf LN, Viggiano TR, Miller VM. Evaluation of sex- and gender-based medicine training in post-graduate medical education: a cross-sectional survey study. *Biology of Sex Differences*. 2016;7(S1).
  54. Curran VR, Fleet L, Kirby F. Factors influencing rural health care professionals' access to continuing professional education. *Aust J Rural Health*. 2006;14(2):51-5.
  55. Berndt A, Murray CM, Kennedy K, Stanley MJ, Gilbert-Hunt S. Effectiveness of distance learning strategies for continuing professional development (CPD) for rural allied health practitioners: a systematic review. *BMC Medical Education*. 2017;17(1).
  56. OCDE. Geographic Variations in Health Care 2014.
  57. Bertakis KD, Helms LJ, Callahan EJ, Azari R, Robbins JA. The influence of gender on physician practice style. *Med Care*. 1995;33(4):407-16.
  58. Carey RN, Connell LE, Johnston M, Rothman AJ, de Bruin M, Kelly MP, et al. Behavior Change Techniques and Their Mechanisms of Action: A Synthesis of Links Described in Published Intervention Literature. *Annals of Behavioral Medicine*. 2018;53(8):693-707.
  59. Etherington N, Rodrigues IB, Giangregorio L, Graham ID, Hoens AM, Kasperavicius D, et al. Applying an intersectionality lens to the theoretical domains framework: a tool for thinking about how intersecting social identities and structures of power influence behaviour. *BMC Medical Research Methodology*. 2020;20(1).

- 1  
2  
3 60. Guly HR. Continuing professional development for doctors in accident and  
4 emergency. *Journal of Accident & Emergency Medicine*. 2000;17(1):12-4.  
5 61. Peek ME. Gender differences in diabetes-related lower extremity amputations.  
6 *Clinical orthopaedics and related research*. 2011;469(7):1951-5.  
7 62. Weziak-Bialowolska D. Differences in Gender Norms Between Countries: Are  
8 They Valid? The Issue of Measurement Invariance. *European journal of population =*  
9 *Revue europeenne de demographie*. 2015;31(1):51-76.  
10 63. Macdermid JC, Graham ID. Knowledge Translation: Putting the “Practice” in  
11 Evidence-Based Practice. *Hand Clinics*. 2009;25(1):125-43.  
12 64. Eccles MP, Hrisos S, Francis J, Kaner EF, Dickinson HO, Beyer F, et al. Do self-  
13 reported intentions predict clinicians' behaviour: a systematic review. *Implementation*  
14 *Science*. 2006;1(1).  
15 65. Wakefield J, Herbert CP, Maclure M, Dormuth C, Wright JM, Legare J, et al.  
16 Commitment to change statements can predict actual change in practice. *The Journal of*  
17 *continuing education in the health professions*. 2003;23(2):81-93.  
18 66. van Braak M, Visser M, Holtrop M, Stadius Muller I, Bont J, van Dijk N. What  
19 motivates general practitioners to change practice behaviour? A qualitative study of audit  
20 and feedback group sessions in Dutch general practice. *BMJ open*. 2019;9(5):e025286.  
21  
22  
23  
24  
25  
26  
27  
28  
29  
30  
31  
32  
33  
34  
35  
36  
37  
38  
39  
40  
41  
42  
43  
44  
45  
46  
47  
48  
49  
50  
51  
52  
53  
54  
55  
56  
57  
58  
59  
60

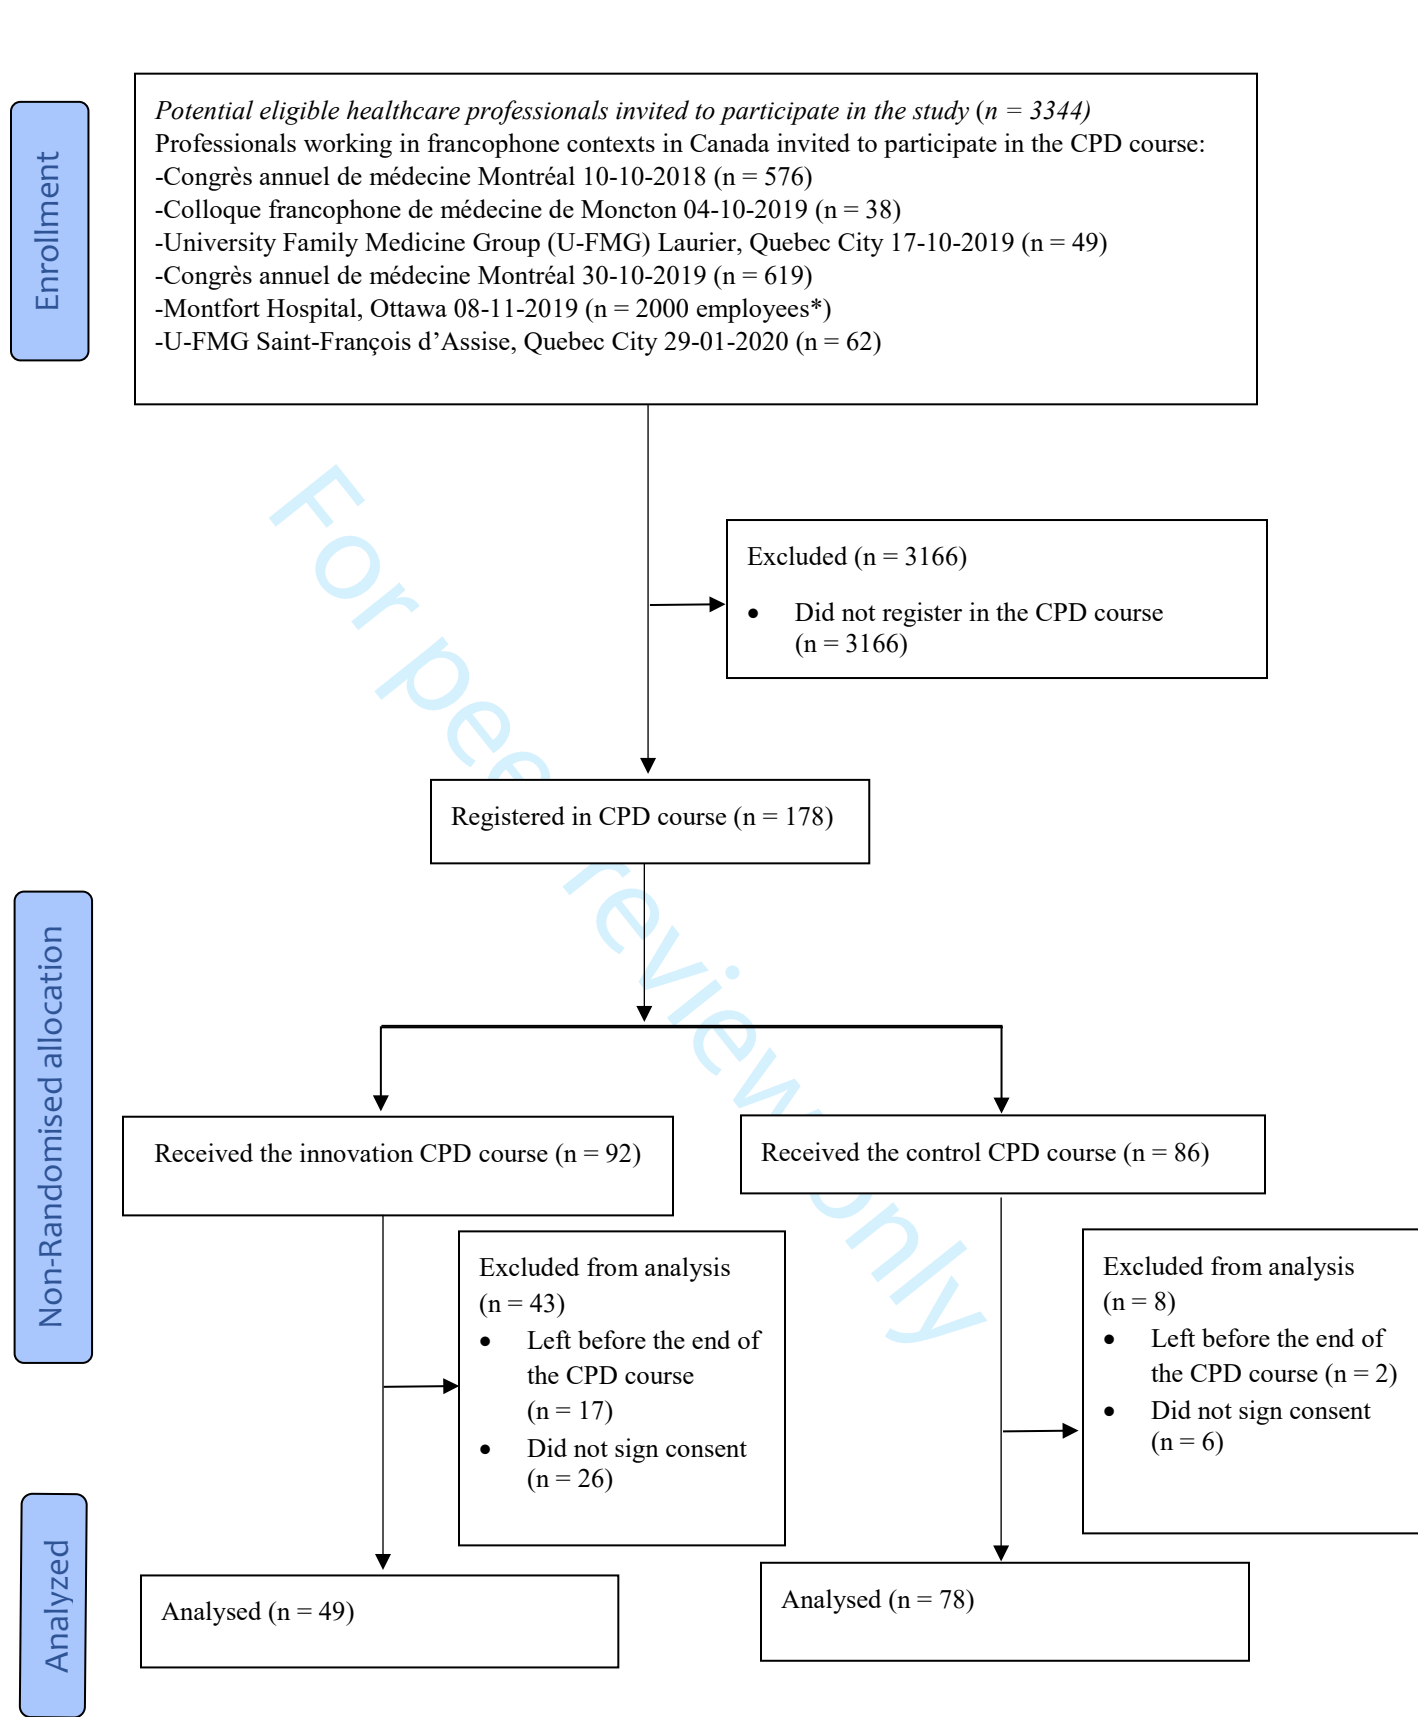

**Supplementary table 1:** Distribution of the scores of intention to include sex and gender considerations in patient care in the clinical context of T2D and depression

|                                | Parametric estimation* |           |                          |              | Non-parametric estimation† |                   |              |
|--------------------------------|------------------------|-----------|--------------------------|--------------|----------------------------|-------------------|--------------|
|                                | Innovation             | Control   | Mean difference (95% CI) | PValue‡      | Innovation                 | Control           | P Value‡     |
| <b>No. of participants</b>     | 49                     | 78        |                          |              | 49                         | 78                |              |
| <b>Total</b>                   | 5.65±0.19              | 5.19±0.15 | -0.47 (-0.95; 0.01)      | 0.057        | 5.50 (5.00; 6.50)          | 5.50 (4.50; .00)  | 0.162        |
| <b>Age (years)</b>             |                        |           |                          |              |                            |                   |              |
| < 44                           | 5.68±0.25              | 5.30±0.18 | -0.38 (-1.00; 0.24)      | 0.226        | 5.50 (5.00; 6.50)          | 5.50 (5.00; 6.50) | 0.717        |
| ≥ 45                           | 5.92±0.29              | 4.93±0.26 | -0.99 (-1.78; -0.20)     | <b>0.016</b> | 6.00 (5.00; 6.50)          | 5.50 (3.50; 6.00) | <b>0.029</b> |
| <b>Gender</b>                  |                        |           |                          |              |                            |                   |              |
| Men                            | 5.79±0.45              | 4.79±0.34 | -0.99 (-2.19; 0.20)      | 0.098        | 6.00 (5.00; 6.50)          | 5.25 (3.50; 6.00) | 0.070        |
| Women                          | 5.78±0.21              | 5.24±0.17 | -0.54 (-1.08; 0.00)      | 0.051        | 5.50 (5.00; 6.50)          | 5.50 (4.50; 6.50) | 0.245        |
| <b>Language</b>                |                        |           |                          |              |                            |                   |              |
| French                         | 5.81±0.20              | 5.35±0.16 | -0.46 (-0.97; 0.05)      | 0.073        | 6.00 (5.00; 6.50)          | 5.50 (4.50; 6.00) | 0.133        |
| Other                          | 5.70±0.42              | 4.76±0.35 | -0.94 (-2.05; 0.17)      | 0.096        | 5.50 (5.00; 6.50)          | 5.50 (4.50; 6.00) | 0.346        |
| <b>Province of practice</b>    |                        |           |                          |              |                            |                   |              |
| Quebec                         | 5.85±0.20              | 5.43±0.15 | -0.43 (-0.94; 0.08)      | 0.097        | 6.00 (5.00; 6.50)          | 5.50 (5.00; 6.50) | 0.144        |
| Ontario                        | 5.83±0.43              | 4.89±0.43 | -0.94 (-2.23; 0.34)      | 0.138        | 6.00 (5.00; 6.50)          | 5.00 (4.50; 6.00) | 0.223        |
| New Brunswick                  | 5.36±0.73              | 4.00±0.64 | -1.36 (-3.44; 0.72)      | 0.184        | 5.50 (5.00; 5.50)          | 4.00 (1.00; 6.00) | 0.512        |
| <b>Environment of practice</b> |                        |           |                          |              |                            |                   |              |

|    |       |           |           |          |       |        |             |              |
|----|-------|-----------|-----------|----------|-------|--------|-------------|--------------|
| 1  |       |           |           |          |       |        |             |              |
| 2  |       |           |           |          |       |        |             |              |
| 3  | Urban | 5.74±0.20 | 5.37±0.16 | -0.37 (- | 0.143 | 5.50   | 5.50 (5.00; | 0.486        |
| 4  |       |           |           | 0.88;    |       | (5.00; | 6.50)       |              |
| 5  |       |           |           | 0.13)    |       | 6.50)  |             |              |
| 6  | Rural | 6.38±0.87 | 4.45±0.55 | -1.93 (- | 0.086 | 6.25   | 5.25 (3.50; | <b>0.018</b> |
| 7  |       |           |           | 4.17;    |       | (6.00; | 6.00)       |              |
| 8  |       |           |           | 0.32)    |       | 6.75)  |             |              |
| 9  |       |           |           |          |       |        |             |              |
| 10 |       |           |           |          |       |        |             |              |

---

\*Mean±standard deviation;

†Median (25<sup>th</sup> percentile; 75<sup>th</sup> percentile);

‡Derived from the general linear models;

‡Derived from the Kruskal-Wallis (Wilcoxon) test

For peer review only

1  
2  
3  
4  
5  
6  
7  
8  
9  
10  
11  
12  
13  
14  
15  
16  
17  
18  
19  
20  
21  
22  
23  
24  
25  
26  
27  
28  
29  
30  
31  
32  
33  
34  
35  
36  
37  
38  
39  
40  
41  
42  
43  
44  
45  
46  
47  
48  
49  
50  
51  
52  
53  
54  
55  
56  
57  
58  
59  
60

**Supplementary table 2:** Recommendations for improving the CPD training, based on barriers and facilitators, using the COM-B model, the Theoretical Domains Framework and the CPD-Reaction questionnaire

| COM-B criteria     | COM-B criteria subcategory | TDF domains linked to COM-B         | Barriers and facilitators perceived by health professionals to including sex and gender considerations in their clinical practice                                   | Psychosocial determinants of the CPD-Reaction questionnaire | Recommendations (COM-B Intervention function)                                                                                                                                                                                                                      |
|--------------------|----------------------------|-------------------------------------|---------------------------------------------------------------------------------------------------------------------------------------------------------------------|-------------------------------------------------------------|--------------------------------------------------------------------------------------------------------------------------------------------------------------------------------------------------------------------------------------------------------------------|
| <b>Opportunity</b> |                            |                                     |                                                                                                                                                                     |                                                             |                                                                                                                                                                                                                                                                    |
|                    | Social                     | Social influence                    | Health professionals assume the patient's gender based on his/her societal role (Barrier)                                                                           | Social influence                                            | In the CPD course, a clinical case vignette could demonstrate the integration of sex and gender considerations and reflect on the different social stigmas associated with gender (Modelling)                                                                      |
|                    | Physical                   | Environmental context and resources | The patient's sex is routinely recorded in medical notes (Facilitator)                                                                                              |                                                             | CPD training could expand on routine practices that already include sex and gender in clinical practice, example: recording sex, but going further by asking questions about perceived gender, sexual orientation (Training)                                       |
|                    |                            |                                     | The androcentric nature of the French language (the use of masculine generic language to refer to men and women, as well as other gender representations) (Barrier) |                                                             | CPD training could give prompts/cues to demonstrate sex- and gender-sensitive medical language (e.g. revised forms, gender sensitive formulation of questions on sexuality and relationships) to promote equity in clinical practice (Environmental restructuring) |
|                    |                            |                                     | The healthcare professional perceives that the language used by physicians towards a patient may be                                                                 |                                                             | The CPD training could encourage health professionals to self-monitor their use of gender inclusive language (Training/Enablement)                                                                                                                                 |
|                    |                            |                                     |                                                                                                                                                                     |                                                             | CPD training could demonstrate sex- and gender-sensitive behaviours and patterns of speech through video animations of clinical visits between health professionals and their                                                                                      |

1  
2  
3  
4  
5  
6  
7  
8  
9  
10  
11  
12  
13  
14  
15  
16  
17  
18  
19  
20  
21  
22  
23  
24  
25  
26  
27  
28  
29  
30  
31  
32  
33  
34  
35  
36  
37  
38  
39  
40  
41  
42  
43  
44  
45  
46  
47  
48  
49  
50  
51  
52  
53  
54  
55  
56  
57  
58  
59  
60

|                   |                                                                                                                                          |                                                                                                                                               |                                                 |                                                                                                                                                                                                                                              |                                                                                                                                                                                                                                                                  |
|-------------------|------------------------------------------------------------------------------------------------------------------------------------------|-----------------------------------------------------------------------------------------------------------------------------------------------|-------------------------------------------------|----------------------------------------------------------------------------------------------------------------------------------------------------------------------------------------------------------------------------------------------|------------------------------------------------------------------------------------------------------------------------------------------------------------------------------------------------------------------------------------------------------------------|
|                   |                                                                                                                                          |                                                                                                                                               | different according to sex and gender (Barrier) |                                                                                                                                                                                                                                              | patients, as well as showing various health professional and patient scenarios (Training)                                                                                                                                                                        |
| <b>Motivation</b> |                                                                                                                                          |                                                                                                                                               |                                                 |                                                                                                                                                                                                                                              |                                                                                                                                                                                                                                                                  |
| Reflective        | Social and professional role and identity                                                                                                | The health professional reflects positively on his/her relationship with the patient (Facilitator)                                            |                                                 |                                                                                                                                                                                                                                              |                                                                                                                                                                                                                                                                  |
|                   | Beliefs about capabilities                                                                                                               | The health professional feels he/she can accurately observe the phenotype of the patient (Facilitator)                                        | Beliefs about capabilities                      |                                                                                                                                                                                                                                              | Self-monitoring of behaviour to encourage health professionals to analyse how they record patient phenotypes: what do they take into consideration? Do they ask specific questions or is it strictly observational? (Enablement)                                 |
|                   | Intentions                                                                                                                               | The health professional has the intention to change his/her therapeutic approach by considering the differences of gender (Facilitator)       | Intention                                       |                                                                                                                                                                                                                                              | Enable health professionals to change their behaviour by demonstrating strategies they have already undertaken to consider the sex of the patient during their therapeutic approaches (Modelling)                                                                |
|                   |                                                                                                                                          | The health professional does not have the intention to change his/her therapeutic approach by considering the differences of gender (Barrier) |                                                 |                                                                                                                                                                                                                                              | Offer information about social consequences of not modifying their care to include sex and gender considerations (Education)<br><br>Offer information about health consequences of not modifying their care to include sex and gender considerations (Education) |
| Goals             | The health professional does not perceive the integration of the concepts of sex and gender in clinical practice as a priority (Barrier) |                                                                                                                                               |                                                 | Enable participants to engage in action planning to include sex and gender considerations in their clinical practice, as well as implementation intentions (Enablement)<br><br>Enable participants to engage in specific goal setting on how |                                                                                                                                                                                                                                                                  |

1  
2  
3  
4  
5  
6  
7  
8  
9  
10  
11  
12  
13  
14  
15  
16  
17  
18  
19  
20  
21  
22  
23  
24  
25  
26  
27  
28  
29  
30  
31  
32  
33  
34  
35  
36  
37  
38  
39  
40  
41  
42  
43  
44  
45  
46  
47  
48  
49  
50  
51  
52  
53  
54  
55  
56  
57  
58  
59  
60

|                   |               |                                          |                                                                                                                                     |                            |                                                                                                                                                                                                                                                                                                            |
|-------------------|---------------|------------------------------------------|-------------------------------------------------------------------------------------------------------------------------------------|----------------------------|------------------------------------------------------------------------------------------------------------------------------------------------------------------------------------------------------------------------------------------------------------------------------------------------------------|
|                   |               |                                          |                                                                                                                                     |                            | they would include sex and gender considerations in their clinical practice (Goal setting)                                                                                                                                                                                                                 |
|                   |               | Beliefs about consequences               | The health professional mentions that they would not change their therapeutic approach according to the patient's gender (Barrier)  | Beliefs about consequences | Offer CPD content with credible sources about the health consequences of not modifying their care to include sex and gender considerations (Education)<br><br>Demonstration of various techniques, shared decision making, cues and prompts that include sex and gender considerations in care (Modelling) |
| <b>Capability</b> |               |                                          |                                                                                                                                     |                            |                                                                                                                                                                                                                                                                                                            |
|                   | Psychological | Memory, Attention and Decision Processes | The health professional perceives that sex and gender are not systematic in the decision-making process (Barrier)                   |                            | Offer specific training to create routine and habit formation that encourages the systematic inclusion of sex and gender considerations in the decision-making process (Training)                                                                                                                          |
|                   |               | Cognitive and interpersonal skills       | The health professional does not assume the sex of the patient and acknowledges different treatment methods by gender (Facilitator) |                            |                                                                                                                                                                                                                                                                                                            |
|                   |               |                                          | The health professional acknowledges different clinical representation by gender (Facilitator)                                      |                            |                                                                                                                                                                                                                                                                                                            |
|                   |               |                                          | The health professional assumed the gender of the patient when analyzing a clinical vignette (Barrier)                              |                            | As part of skills training, the CPD training could demonstrate how to explore the different aspects of sex attribution, without assuming the sex of the patient (Training)<br><br>Give specific instructions on how to explore the different aspects of sex attribution,                                   |



1  
2  
3  
4  
5  
6  
7  
8  
9  
10  
11  
12  
13  
14  
15  
16  
17  
18  
19  
20  
21  
22  
23  
24  
25  
26  
27  
28  
29  
30  
31  
32  
33  
34  
35  
36  
37  
38  
39  
40  
41  
42  
43  
44  
45  
46  
47  
48  
49  
50  
51  
52  
53  
54  
55  
56  
57  
58  
59  
60

|  |  |           |                                                                                                                  |  |                                                                                                                                                                                                                                                                                                                                                              |
|--|--|-----------|------------------------------------------------------------------------------------------------------------------|--|--------------------------------------------------------------------------------------------------------------------------------------------------------------------------------------------------------------------------------------------------------------------------------------------------------------------------------------------------------------|
|  |  |           |                                                                                                                  |  | <p>without assuming the sex of the patient (Training)</p> <p>Offer feedback on outcome(s) of assuming the sex of the patient in a clinical case vignette (Training)</p> <p>Offer a practice/rehearsal period after receiving instructions on how to explore the different aspects of sex attribution, without assuming the sex of the patient (Training)</p> |
|  |  | Knowledge | The health professional recognizes the differences between sex and gender in scientific literature (Facilitator) |  |                                                                                                                                                                                                                                                                                                                                                              |
|  |  |           | The health professional did not ask the gender of the patient when analyzing a clinical vignette (Barrier)       |  | <p>Include information on the possible clinical outcome(s) of assuming the wrong sex or gender of the patient (Education)</p>                                                                                                                                                                                                                                |
|  |  |           | The health professional is not aware of the concepts of sex and gender (Barrier)                                 |  | <p>Offer information about health consequences of not considering or confusing sex and gender terms (Education)</p>                                                                                                                                                                                                                                          |

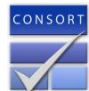

## CONSORT 2010 checklist of information to include when reporting a pilot or feasibility trial\*

| Section/Topic             | Item No | Checklist item                                                                                                                                                                              | Reported on page No |
|---------------------------|---------|---------------------------------------------------------------------------------------------------------------------------------------------------------------------------------------------|---------------------|
| <b>Title and abstract</b> |         |                                                                                                                                                                                             |                     |
|                           | 1a      | Identification as a pilot or feasibility randomised trial in the title                                                                                                                      | 1 (mixed methods)   |
|                           | 1b      | Structured summary of pilot trial design, methods, results, and conclusions (for specific guidance see CONSORT abstract extension for pilot trials)                                         | 4                   |
| <b>Introduction</b>       |         |                                                                                                                                                                                             |                     |
| Background and objectives | 2a      | Scientific background and explanation of rationale for future definitive trial, and reasons for randomised pilot trial                                                                      | 7-8                 |
|                           | 2b      | Specific objectives or research questions for pilot trial                                                                                                                                   | 8                   |
| <b>Methods</b>            |         |                                                                                                                                                                                             |                     |
| Trial design              | 3a      | Description of pilot trial design (such as parallel, factorial) including allocation ratio                                                                                                  | 8                   |
|                           | 3b      | Important changes to methods after pilot trial commencement (such as eligibility criteria), with reasons                                                                                    | NA                  |
| Participants              | 4a      | Eligibility criteria for participants                                                                                                                                                       | 9-10                |
|                           | 4b      | Settings and locations where the data were collected                                                                                                                                        | 9-10                |
|                           | 4c      | How participants were identified and consented                                                                                                                                              | 9-10                |
| Interventions             | 5       | The interventions for each group with sufficient details to allow replication, including how and when they were actually administered                                                       | 9-10-11             |
| Outcomes                  | 6a      | Completely defined prespecified assessments or measurements to address each pilot trial objective specified in 2b, including how and when they were assessed                                | 11-12               |
|                           | 6b      | Any changes to pilot trial assessments or measurements after the pilot trial commenced, with reasons                                                                                        | NA                  |
|                           | 6c      | If applicable, prespecified criteria used to judge whether, or how, to proceed with future definitive trial                                                                                 | NA                  |
| Sample size               | 7a      | Rationale for numbers in the pilot trial                                                                                                                                                    | 11                  |
|                           | 7b      | When applicable, explanation of any interim analyses and stopping guidelines                                                                                                                | NA                  |
| Randomisation:            |         |                                                                                                                                                                                             |                     |
| Sequence generation       | 8a      | Method used to generate the random allocation sequence                                                                                                                                      | NA                  |
|                           | 8b      | Type of randomisation(s); details of any restriction (such as blocking and block size)                                                                                                      | NA                  |
| Allocation concealment    | 9       | Mechanism used to implement the random allocation sequence (such as sequentially numbered containers), describing any steps taken to conceal the sequence until interventions were assigned | NA                  |

|                                                      |     |                                                                                                                                                                                       |          |
|------------------------------------------------------|-----|---------------------------------------------------------------------------------------------------------------------------------------------------------------------------------------|----------|
| mechanism                                            |     |                                                                                                                                                                                       |          |
| Implementation                                       | 10  | Who generated the random allocation sequence, who enrolled participants, and who assigned participants to interventions                                                               | NA       |
| Blinding                                             | 11a | If done, who was blinded after assignment to interventions (for example, participants, care providers, those assessing outcomes) and how                                              | 10-11    |
|                                                      | 11b | If relevant, description of the similarity of interventions                                                                                                                           | 10-11    |
| Statistical methods                                  | 12  | Methods used to address each pilot trial objective whether qualitative or quantitative                                                                                                | 12-13    |
| <b>Results</b>                                       |     |                                                                                                                                                                                       |          |
| Participant flow (a diagram is strongly recommended) | 13a | For each group, the numbers of participants who were approached and/or assessed for eligibility, randomly assigned, received intended treatment, and were assessed for each objective | 14       |
|                                                      | 13b | For each group, losses and exclusions after randomisation, together with reasons                                                                                                      | 14       |
| Recruitment                                          | 14a | Dates defining the periods of recruitment and follow-up                                                                                                                               | 14       |
|                                                      | 14b | Why the pilot trial ended or was stopped                                                                                                                                              | NA       |
| Baseline data                                        | 15  | A table showing baseline demographic and clinical characteristics for each group                                                                                                      | 14-15    |
| Numbers analysed                                     | 16  | For each objective, number of participants (denominator) included in each analysis. If relevant, these numbers should be by randomised group                                          | 14-15-16 |
| Outcomes and estimation                              | 17  | For each objective, results including expressions of uncertainty (such as 95% confidence interval) for any estimates. If relevant, these results should be by randomised group        | 15-16-17 |
| Ancillary analyses                                   | 18  | Results of any other analyses performed that could be used to inform the future definitive trial                                                                                      | NA       |
| Harms                                                | 19  | All important harms or unintended effects in each group (for specific guidance see CONSORT for harms)                                                                                 | NA       |
|                                                      | 19a | If relevant, other important unintended consequences                                                                                                                                  | NA       |
| <b>Discussion</b>                                    |     |                                                                                                                                                                                       |          |
| Limitations                                          | 20  | Pilot trial limitations, addressing sources of potential bias and remaining uncertainty about feasibility                                                                             | 24-25    |
| Generalisability                                     | 21  | Generalisability (applicability) of pilot trial methods and findings to future definitive trial and other studies                                                                     | 24       |
| Interpretation                                       | 22  | Interpretation consistent with pilot trial objectives and findings, balancing potential benefits and harms, and considering other relevant evidence                                   | 22-23-24 |
|                                                      | 22a | Implications for progression from pilot to future definitive trial, including any proposed amendments                                                                                 | 23-24    |
| <b>Other information</b>                             |     |                                                                                                                                                                                       |          |
| Registration                                         | 23  | Registration number for pilot trial and name of trial registry                                                                                                                        | 5        |
| Protocol                                             | 24  | Where the pilot trial protocol can be accessed, if available                                                                                                                          | NA       |
| Funding                                              | 25  | Sources of funding and other support (such as supply of drugs), role of funders                                                                                                       | 27       |
|                                                      | 26  | Ethical approval or approval by research review committee, confirmed with reference number                                                                                            | 27       |

1  
2  
3  
4  
5  
6  
7  
8  
9  
10  
11  
12  
13  
14  
15  
16  
17  
18  
19  
20  
21  
22  
23  
24  
25  
26  
27  
28  
29  
30  
31  
32  
33  
34  
35  
36  
37  
38  
39  
40  
41  
42  
43  
44  
45  
46

Citation: Eldridge SM, Chan CL, Campbell MJ, Bond CM, Hopewell S, Thabane L, et al. CONSORT 2010 statement: extension to randomised pilot and feasibility trials. *BMJ*. 2016;355.  
\*We strongly recommend reading this statement in conjunction with the CONSORT 2010, extension to randomised pilot and feasibility trials, Explanation and Elaboration for important clarifications on all the items. If relevant, we also recommend reading CONSORT extensions for cluster randomised trials, non-inferiority and equivalence trials, non-pharmacological treatments, herbal interventions, and pragmatic trials. Additional extensions are forthcoming: for those and for up to date references relevant to this checklist, see [www.consort-statement.org](http://www.consort-statement.org).

For peer review only

# BMJ Open

## Integration of Sex and Gender in a Continuing Professional Development Course on Diabetes and Depression: A Mixed Methods Feasibility Study

|                                 |                                                                                                                                                                                                                                                                                                                                                                                                                                                                                                                                                                                                                                                                                                                                                                                                                                                                                                                                                                                                                                                                                                                                                                                                                                                                                                                                                                                                                                                                                                                                                                                                                      |
|---------------------------------|----------------------------------------------------------------------------------------------------------------------------------------------------------------------------------------------------------------------------------------------------------------------------------------------------------------------------------------------------------------------------------------------------------------------------------------------------------------------------------------------------------------------------------------------------------------------------------------------------------------------------------------------------------------------------------------------------------------------------------------------------------------------------------------------------------------------------------------------------------------------------------------------------------------------------------------------------------------------------------------------------------------------------------------------------------------------------------------------------------------------------------------------------------------------------------------------------------------------------------------------------------------------------------------------------------------------------------------------------------------------------------------------------------------------------------------------------------------------------------------------------------------------------------------------------------------------------------------------------------------------|
| Journal:                        | <i>BMJ Open</i>                                                                                                                                                                                                                                                                                                                                                                                                                                                                                                                                                                                                                                                                                                                                                                                                                                                                                                                                                                                                                                                                                                                                                                                                                                                                                                                                                                                                                                                                                                                                                                                                      |
| Manuscript ID                   | bmjopen-2021-050890.R3                                                                                                                                                                                                                                                                                                                                                                                                                                                                                                                                                                                                                                                                                                                                                                                                                                                                                                                                                                                                                                                                                                                                                                                                                                                                                                                                                                                                                                                                                                                                                                                               |
| Article Type:                   | Original research                                                                                                                                                                                                                                                                                                                                                                                                                                                                                                                                                                                                                                                                                                                                                                                                                                                                                                                                                                                                                                                                                                                                                                                                                                                                                                                                                                                                                                                                                                                                                                                                    |
| Date Submitted by the Author:   | 22-Mar-2022                                                                                                                                                                                                                                                                                                                                                                                                                                                                                                                                                                                                                                                                                                                                                                                                                                                                                                                                                                                                                                                                                                                                                                                                                                                                                                                                                                                                                                                                                                                                                                                                          |
| Complete List of Authors:       | <p>Deom Tardif, Alèxe; VITAM Centre de recherche en santé durable, Centre intégré universitaire de santé et services sociaux de la Capitale-Nationale; Université Laval, Department of Social and Preventive Medicine, Faculty of Medicine</p> <p>Gogovor, Amédé; VITAM Centre de recherche en santé durable, Centre intégré universitaire de santé et services sociaux de la Capitale-Nationale; Université Laval, Department of Family Medicine and Emergency Medicine, Faculty of Medicine</p> <p>Guay-Bélangier, Sabrina ; VITAM Centre de recherche en santé durable, Centre intégré universitaire de santé et services sociaux de la Capitale-Nationale</p> <p>Audet, Denis; University Family Medicine Group Saint-François-d'Assise Parent, Nicole; Médecins francophones du Canada</p> <p>Gaudreau, André; Patient Partner</p> <p>Remy-Lamarche, Danièle; Patient Partner</p> <p>Vigneault, Luc; Patient Partner</p> <p>Ngueta, Gérard; VITAM Centre de recherche en santé durable, Centre intégré universitaire de santé et services sociaux de la Capitale-Nationale</p> <p>Bilodeau, André; McGill University Faculty of Medicine and Health Sciences, Department of Family Medicine</p> <p>Légaré, France; VITAM Centre de recherche en santé durable, Centre intégré universitaire de santé et services sociaux de la Capitale-Nationale; Université Laval, Department of Family Medicine and Emergency Medicine, Faculty of Medicine</p> <p>mATrICES-F Group, the; VITAM Centre de recherche en santé durable, Centre intégré universitaire de santé et services sociaux de la Capitale-Nationale</p> |
| <b>Primary Subject Heading</b>: | Medical education and training                                                                                                                                                                                                                                                                                                                                                                                                                                                                                                                                                                                                                                                                                                                                                                                                                                                                                                                                                                                                                                                                                                                                                                                                                                                                                                                                                                                                                                                                                                                                                                                       |
| Secondary Subject Heading:      | General practice / Family practice                                                                                                                                                                                                                                                                                                                                                                                                                                                                                                                                                                                                                                                                                                                                                                                                                                                                                                                                                                                                                                                                                                                                                                                                                                                                                                                                                                                                                                                                                                                                                                                   |
| Keywords:                       | EDUCATION & TRAINING (see Medical Education & Training), PUBLIC HEALTH, PRIMARY CARE                                                                                                                                                                                                                                                                                                                                                                                                                                                                                                                                                                                                                                                                                                                                                                                                                                                                                                                                                                                                                                                                                                                                                                                                                                                                                                                                                                                                                                                                                                                                 |
|                                 |                                                                                                                                                                                                                                                                                                                                                                                                                                                                                                                                                                                                                                                                                                                                                                                                                                                                                                                                                                                                                                                                                                                                                                                                                                                                                                                                                                                                                                                                                                                                                                                                                      |

1  
2  
3  
4  
5  
6  
7  
8  
9  
10  
11  
12  
13  
14  
15  
16  
17  
18  
19  
20  
21  
22  
23  
24  
25  
26  
27  
28  
29  
30  
31  
32  
33  
34  
35  
36  
37  
38  
39  
40  
41  
42  
43  
44  
45  
46  
47  
48  
49  
50  
51  
52  
53  
54  
55  
56  
57  
58  
59  
60



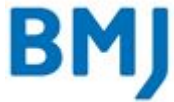

I, the Submitting Author has the right to grant and does grant on behalf of all authors of the Work (as defined in the below author licence), an exclusive licence and/or a non-exclusive licence for contributions from authors who are: i) UK Crown employees; ii) where BMJ has agreed a CC-BY licence shall apply, and/or iii) in accordance with the terms applicable for US Federal Government officers or employees acting as part of their official duties; on a worldwide, perpetual, irrevocable, royalty-free basis to BMJ Publishing Group Ltd ("BMJ") its licensees and where the relevant Journal is co-owned by BMJ to the co-owners of the Journal, to publish the Work in this journal and any other BMJ products and to exploit all rights, as set out in our [licence](#).

The Submitting Author accepts and understands that any supply made under these terms is made by BMJ to the Submitting Author unless you are acting as an employee on behalf of your employer or a postgraduate student of an affiliated institution which is paying any applicable article publishing charge ("APC") for Open Access articles. Where the Submitting Author wishes to make the Work available on an Open Access basis (and intends to pay the relevant APC), the terms of reuse of such Open Access shall be governed by a Creative Commons licence – details of these licences and which [Creative Commons](#) licence will apply to this Work are set out in our licence referred to above.

Other than as permitted in any relevant BMJ Author's Self Archiving Policies, I confirm this Work has not been accepted for publication elsewhere, is not being considered for publication elsewhere and does not duplicate material already published. I confirm all authors consent to publication of this Work and authorise the granting of this licence.

1  
2  
3 **Integration of Sex and Gender in a Continuing Professional Development Course on**  
4 **Diabetes and Depression: A Mixed Methods Feasibility Study**  
5

6  
7 Deom Tardif A<sup>1,2</sup>, Gogovor, A<sup>1,3</sup>, Guay-Bélanger S<sup>1</sup>, Audet D<sup>4</sup>, Parent N<sup>5</sup>, Gaudreau A<sup>6</sup>,  
8 Rémy-Lamarche D<sup>6</sup>, Vigneault L<sup>6</sup>, Ngueta G<sup>1</sup>, Bilodeau A<sup>7</sup>, Légaré F<sup>1,3</sup> and the  
9 mATrICES-F Group  
10  
11

12  
13 <sup>1</sup>VITAM – Centre de recherche en santé durable, Centre intégré universitaire de santé et  
14 services sociaux de la Capitale-Nationale, Quebec City, Quebec, Canada  
15

16  
17 <sup>2</sup>Department of Social and Preventive Medicine, Faculty of Medicine, Université Laval,  
18 Quebec City, Quebec, Canada  
19

20  
21 <sup>3</sup>Department of Family Medicine and Emergency Medicine, Faculty of Medicine,  
22 Université Laval, Quebec City, Quebec, Canada  
23

24  
25 <sup>4</sup>University Family Medicine Group Saint-François-d'Assise, Quebec City, Quebec,  
26 Canada  
27

28  
29 <sup>5</sup>Médecins francophones du Canada, Montreal, Quebec, Canada  
30

31  
32 <sup>6</sup>Patient Partner, Quebec, Canada  
33

34  
35 <sup>7</sup>Department of Family Medicine, Faculty of Medicine and Health Sciences,  
36 McGill University, Montreal, Quebec, Canada  
37  
38  
39  
40  
41  
42  
43  
44  
45  
46  
47  
48  
49  
50  
51  
52  
53  
54  
55  
56  
57  
58  
59  
60



**Collaborators mATrICES-F Group:**

Alève Deom Tardif, Université Laval

Amédé Gogovor, Université Laval

André Bilodeau, McGill University

André Bussièrès, McGill University

André Gaudreau, Patient-partner

Audrey Ferron Parayre, University of Ottawa

Caroline Jose, Université de Moncton

Danièle Remy-Lamarche, Patient-partner

Dawn Stacey, University of Ottawa

Denis Audet, University Family Medicine Group Saint-François-d'Assise

Denis Prud'homme, Université de Moncton

France Légaré, Université Laval

Francine Borduas, Médecins francophones du Canada

Gerard Ngueta, VITAM – Centre de recherche en santé durable

Geneviève Roch, Université Laval

Hélène Lee-Gosselin, Université Laval

Laurie Laplanche, Université Laval

Luc Vigneault, Patient-partner

Maman Joyce Dogba, Université Laval

Marie-Claude Tremblay, Université Laval

Marie-Pierre Gagnon, Université Laval

Nicole Parent, Médecins francophones du Canada

1  
2  
3 Sabrina Guay-Bélanger, VITAM – Centre de recherche en santé durable  
4

5 Sophie Desroches, Université Laval  
6

7 Valérie Borde, Centre DECLIC  
8  
9

10 **Corresponding author:**  
11

12 France Légaré, BSc Arch, MD, MSc, PhD, CCFP, FCFP.  
13

14 VITAM – Centre de recherche en santé durable  
15

16 Pavillon Landry-Poulin, entrée A-12, bureau A-4574  
17

18 2525, chemin de la Canardière  
19

20 Quebec City, Quebec, G1J 0A4, Canada  
21

22 Email: [France.legare@mfa.ulaval.ca](mailto:France.legare@mfa.ulaval.ca)  
23  
24

25  
26  
27  
28  
29 **Email addresses:**  
30

31 ADT: [alexe.deom-tardif.1@ulaval.ca](mailto:alexe.deom-tardif.1@ulaval.ca)  
32

33 AGo: [amede.gogovor.1@ulaval.ca](mailto:amede.gogovor.1@ulaval.ca)  
34

35 SGB: [sabrina.guay-belanger.ciusscn@ssss.gouv.qc.ca](mailto:sabrina.guay-belanger.ciusscn@ssss.gouv.qc.ca)  
36

37 DA: [audet\\_denis@videotron.ca](mailto:audet_denis@videotron.ca)  
38

39 NP: [nparent@medecinsfrancophones.ca](mailto:nparent@medecinsfrancophones.ca)  
40

41 AGa: [andrepositif@outlook.com](mailto:andrepositif@outlook.com)  
42

43 DRL: [remy\\_lamarche.daniele@videotron.ca](mailto:remy_lamarche.daniele@videotron.ca)  
44

45 LV: [luc.vigneault2@gmail.com](mailto:luc.vigneault2@gmail.com)  
46

47 GN: [gerard.ngueta.ciusscn@ssss.gouv.qc.ca](mailto:gerard.ngueta.ciusscn@ssss.gouv.qc.ca)  
48

49 AB: [andre.bilodeau@mcgill.ca](mailto:andre.bilodeau@mcgill.ca)  
50  
51  
52  
53  
54  
55  
56  
57  
58  
59  
60

## Abstract

**Objectives** Assess the feasibility and impact of a continuous professional development (CPD) course on type-2 diabetes and depression on health professionals' intention to include sex and gender considerations in patient care.

**Design and setting** In collaboration with CPD organisations and patient-partners, we conducted a mixed-methods feasibility controlled trial with post-intervention measures in three Canadian provinces.

**Participants** Of 178 eligible health professionals, 127 completed questionnaires and 67 participated in semi-structured group discussions.

**Intervention and comparator** An interactive one-hour CPD course, co-designed with patient-partners, on diabetes and depression that included sex and gender considerations (innovation) was compared to a similar course that didn't include them (comparator).

**Outcomes** Feasibility of recruitment and retention of CPD organisations and patient-partners throughout the study; adherence to planned activities; health professionals' intention to include sex and gender considerations in patient care as measured by the CPD-Reaction questionnaire; and barriers and facilitators using the Theoretical Domains Framework.

**Results** All recruited CPD organisations and patient-partners remained engaged throughout the study. All planned CPD courses occurred. Overall, 71% of eligible health professionals participated (63% under 44 years old; 79.5% women; 67.7% practising in French; 66.9% practising in Quebec; 78.8% in urban practice). After training, mean intention scores for the innovation (n=49) and control groups (n=78) were  $5.65 \pm 0.19$  and  $5.19 \pm 0.15$ , respectively. Mean difference was  $-0.47$  (CI  $-0.95$  to  $0.01$ ;  $p=0.06$ ). Adjusted for age, gender and practice settings, mean difference was  $-0.57$  (CI  $-1.09$  to  $-0.05$ ;  $p=0.03$ ). We identified eight Theoretical Domains related to barriers and six related to facilitators for providing sex- and gender-adapted diabetes and depression care.

**Conclusions** CPD training on diabetes and depression that includes sex and gender considerations is feasible and, compared to CPD training that does not, may prompt health

1  
2  
3 professionals to modify their care. Addressing identified barriers and facilitators could  
4 increase intention.  
5

6  
7 **Registration number:** NCT03928132 with ClinicalTrials.gov.  
8

9  
10 **Keywords:** Sex and gender, knowledge translation, continuous professional development,  
11 diabetes, depression, patient engagement, Theory of Planned Behaviour, Theoretical  
12 Domains, COM-B  
13  
14  
15  
16  
17  
18  
19  
20  
21  
22  
23  
24  
25  
26  
27  
28  
29  
30  
31  
32  
33  
34  
35  
36  
37  
38  
39  
40  
41  
42  
43  
44  
45  
46  
47  
48  
49  
50  
51  
52  
53  
54  
55  
56  
57  
58  
59  
60

### Strengths and limitations of this study

- Continuous professional development (CPD) courses that included sex and gender considerations were co-designed with patients experiencing diabetes and/or depression.
- Outcome measures were informed by theory.
- This mixed-methods controlled trial used post-intervention measures only, as pre-intervention measures were not feasible. Although randomised allocation of participants was not possible, it was feasible to conduct a mixed-methods controlled trial.

## INTRODUCTION

A variety of research initiatives are attempting to reduce health inequities between men and women (1, 2). Research that includes sex- and gender-based analysis results in more accurate evidence, more relevant recommendations, more specifically-targeted interventions, and better outcomes (3-6). Sex differences are biology-linked differences between females and males caused by different sex chromosomes, sex-specific gene expression of autosomes, sex hormones, and their effects on organ systems (7). Gender differences arise from sociocultural processes such as the different behaviours of women and men, their exposure to environmental influences, impacts of nutrition, lifestyles or stress, and attitudes towards illness, treatment and prevention (7). Gender roles and gender identity are influenced by a complex interplay between genetic, endocrinal, and social factors (8). Finally, sex and gender are not straightforward binary categories. Many femininities and masculinities exist and can influence other important sociodemographic variables (9).

During their lifetime women are twice as likely as men to be diagnosed with depression. In contrast, three times as many men commit suicide (5, 10, 11). Recent evidence supports a link between type 2 diabetes (T2D) and depression, and shows that sex and gender are influential factors in this comorbidity (7, 9). The prevalence of depression in diabetic patients is higher in females than males (23.8% and 12.8%, respectively) (7). On the other hand, a pooled result from 32 studies stated that the risk of developing T2D in patients diagnosed with depression was higher in men than in women (RC=1.63 vs RC=1.29, respectively) (7, 12, 13). These differences are explained by biological differences and psychosocial factors such as body mass index, differences in the distribution of types of adipose tissue, an imbalance of sex hormones, socioeconomic status, psychosocial stress, and sleep deprivation (7, 9). Co-morbidity and mortality associated with the complications of T2D and depression are also different for men and women. For instance, men develop diabetic food syndrome at earlier ages and are more likely to have complications leading to amputations (7, 14). Women, on the other hand, have a higher risk of metabolic syndrome and fatal coronary heart disease than men (7, 15, 16). T2D and depression are also affected by gender differences, explained in part by the different behaviours associated

1  
2  
3 gender with representations of men and women, as well as their different perceptions of  
4 stress (17-19).

5  
6  
7 Despite the impacts of sex and gender differences on prevalence, diagnosis, treatment,  
8 outcomes, and equity, evidence on the importance of these differences has yet to be  
9 translated adequately into clinical training or practice (2, 5, 20). For example, a 2017  
10 review suggested that only 35% of studies on Canadian practice guidelines, a cornerstone  
11 of knowledge translation, reported screening, diagnosis or management considerations  
12 specific to sex or gender, and only 25% used the terms “sex” and “gender” correctly (21).

13  
14  
15 Continuing professional development (CPD) is another cornerstone of knowledge  
16 translation as it mobilises professional and regulatory bodies as well as educational  
17 institutions to foster changes in clinical practice (22, 23). We argue that integrating sex  
18 and gender considerations into CPD is a promising avenue for addressing the inequities  
19 between men and women (5). We define CPD as all educational activities serving to  
20 maintain or increase the knowledge, skills, work performance, and relationships that a  
21 clinician needs to serve patients, the public or the profession. (5, 24, 25). Courses should  
22 be informed by theory-based factors known to influence the adoption of a given  
23 behaviour. Although one of several other factors influencing behaviour change, such as  
24 organisational constraints, intention is considered an acceptable proxy. Indeed, according  
25 to Godin’s integrated model for health professional behaviour change, behavioural  
26 intention is the central influencing factor on behaviour adoption. In turn, this intention is  
27 under the influence of a number of other socio-cognitive factors (26). We aimed to assess  
28 the feasibility and impact of including sex and gender considerations in a CPD course on  
29 T2D and depression on health professionals’ intention to include sex and gender  
30 considerations in patient care.

## 31 32 33 34 35 36 37 38 39 40 41 42 43 44 45 46 **METHODS**

### 47 48 49 **Study design and setting**

50  
51 We conducted a non-randomised mixed-methods study with a concurrent embedded  
52 design: (1) a two-arm non-randomised controlled trial with post-intervention measures  
53 only; and (2) semi-structured group discussions following the CPD course. We used the  
54  
55  
56  
57

1  
2  
3 Theory of Planned Behaviour for quantitative analysis (27, 28), the Theoretical Domains  
4 Framework (TDF) for qualitative analysis (29, 30), and the COM-B (Capability,  
5 Opportunity, Motivation and Behaviour) model to triangulate findings (31). We followed  
6 the CONSORT extension for Pilot and Feasibility Trials Checklist to report results (32).  
7  
8  
9

10 This project is one of six that were funded by the Canadian Institutes of Health Research  
11 to explore sex and gender issues in knowledge translation (33), gender transformative  
12 approaches to knowledge translation, and sex- and gender-based analysis (5, 33).  
13  
14  
15

16 A multidisciplinary team was created of 25 researchers: two sex and gender specialists,  
17 three patient-partners with experience with T2D and/or mental health issues (two men  
18 and one woman), two physicians, one nurse, two CPD managers, one research assistant  
19 and two trainees. An executive committee of 12 team members (including all patient-  
20 partners) held monthly meetings addressing the main concerns in each research phase.  
21 They chose the clinical topic of the course based on needs expressed by CPD providers  
22 (see Innovation below). They then adapted an existing diabetes and depression CPD  
23 course to include sex and gender considerations and contacted CPD providers in three  
24 Canadian provinces to collaborate on implementing the courses.  
25  
26  
27  
28  
29  
30  
31

### 32 **Patient involvement**

33 Three patient-partners, core members of the executive committee, contributed to  
34 governance (e.g., attending meetings and courses, making executive decisions) and  
35 innovation design. They contributed their experience to the CPD course, helped collect  
36 data and interpret results, coauthored this paper and advised us on plain language use for  
37 our presentations.  
38  
39  
40  
41  
42  
43

### 44 **Participants and recruitment**

45 All health professionals working in the clinical settings where our CPD course was  
46 advertised, including hospitals and family medicine groups, or participating in the  
47 continuing medical education (CME) conference where the course was to be offered,  
48 were invited to participate. Invitations were by email and through the Internet registration  
49 platforms of CME conferences in three Canadian provinces (Quebec, Ontario, New-  
50 Brunswick). Participants stayed in their respective groups for the semi-structured group  
51  
52  
53  
54  
55  
56  
57  
58  
59  
60



1  
2  
3 discussion that immediately followed the CPD course. Inclusion criteria were: practising  
4 health professionals available to participate in person for the whole course; and fluent in  
5 French (all our CPD courses were in French). Ethical approval was obtained from the  
6 Centre intégré universitaire de santé et de services sociaux de la Capitale-Nationale  
7 (CIUSSS-CN) Ethics Board (2017-2018-16 MP), the Hôpital Montfort Research ethics  
8 board (19-20-05-009), and the Vitalité Health Network research ethics board (CER-2019-  
9 18).

## 16 **Innovation**

18 Informed by a continuing medical education needs assessment by our key CPD  
19 stakeholder and partner, Médecins francophones du Canada (data not published), we  
20 chose patients with T2D and depression combined as the clinical topic, as physicians felt  
21 there was a gap in their education about this comorbidity. There is growing evidence of  
22 a link between T2D and depression and the importance of sex as a risk factor for this  
23 comorbidity (34-36). The team adapted an existing T2D and depression CPD course to  
24 include evidence-based sex and gender considerations. The original course, a 1-hour  
25 classroom-based activity, describes links between T2D and depression, reviews  
26 CANMAT 2016 Depression Guidelines and reviews pharmacological and non-  
27 pharmacological treatment of T2D and depression. This original course was used in the  
28 control group. Participants in the innovation group attended the same course but adapted  
29 to integrate sex- and gender-specific content including: 1) definitions and differences  
30 between the concepts of sex and gender, 2) epidemiological data on the differences in  
31 incidence, prevalence, morbidity and mortality between men and women with T2D and  
32 depression, and 3) a video explaining sex biases associated with these two conditions.  
33 The adapted CPD course (innovation) kept the original duration (one hour) and medical  
34 content of the original course (comparator). Links between T2D and depression were  
35 explained together with sex and gender differences, and reviews of pharmacological and  
36 non-pharmacological treatments were condensed. As per patient-partners'  
37 recommendations, we also held 30-minute semi-structured group discussions with both  
38 the innovation and control group immediately following the course. In the group  
39 discussion we presented a clinical case vignette on managing a patient with T2D and  
40  
41  
42  
43  
44  
45  
46  
47  
48  
49  
50  
51  
52  
53  
54  
55  
56  
57  
58  
59  
60

1  
2  
3 depression in which the health professional's behaviour exhibited various divergences  
4 with best clinical practices. We asked participants to write down the main divergence and  
5 to categorise it within five categories determined by our team: 1) failure to mention  
6 positive factors for recovery, 2) failure to engage the patient in their health-related  
7 decision, 3) sex and gender biases, 4) failure to take into account notions of sex and  
8 gender, and 5) cannot be categorised. We prompted participants to discuss their  
9 perception of sex and gender considerations by linking them to the clinical vignette and  
10 to their clinical experience of integrating sex and gender considerations in general.  
11  
12  
13  
14  
15  
16

17  
18 Depending on the setting (hospitals, family medicine groups, CME conferences) we either  
19 (1) assigned the participants to the control or innovation group on their arrival to achieve  
20 a balanced number of participants in both groups or (2) the participants registered in one  
21 group or the other, both groups being blinded to the innovation and control group. Thus  
22 participants entered the classroom for whichever course they signed up for. There was no  
23 communication between these groups, as the two courses were given simultaneously.  
24  
25  
26  
27  
28  
29  
30  
31  
32  
33  
34  
35  
36  
37  
38  
39  
40  
41  
42  
43  
44  
45  
46  
47  
48  
49  
50  
51  
52  
53  
54  
55  
56  
57  
58  
59  
60

Participants had all received the same invitation to attend a course on T2D and depression. There was no mention of sex and gender content before participants entered the room. Efforts were made to equally divide groups regarding number and gender of participants. At registration, participants were told that it was a research project that required their consent. Participants could attend the course and receive CME credits whether they chose to participate in the study or not. All CPD courses were delivered by the same two physicians (one man, assigned to the control group, and one woman, assigned to the innovation group) in all the research settings. We planned to offer six courses (three innovation and three control), two in each province (control and innovation simultaneously). Each course (both control and innovation) was a 45-minute lecture on T2D and depression followed by 15 minutes to fill in the CPD-Reaction questionnaire. An additional 30 minutes was planned for the semi-structured group discussion.

### **Outcome Measures**

We assessed three feasibility outcome measures: recruitment, retention and adherence: 1) recruitment of >90 course participants for six courses and study participation rate of >70% (28, 37), 2) retention of CPD organisations, collaborators and patient-partners

1  
2  
3 throughout the project, 3) the holding of all planned CPD courses in all three provinces.  
4 Sample size was based on consultations with clinic managers and CPD providers and on  
5 practical considerations (e.g. average size of CPD courses, venues, the course being  
6 provided in French only).  
7  
8  
9

10 We used CPD-Reaction (French version) to measure participants' behavioural intention  
11 to include sex and gender considerations in patient care. CPD-Reaction is a self-  
12 administered questionnaire (Cronbach  $\alpha$  0.79–0.89) (38, 39). Twelve items measure five  
13 constructs determined through a systematic review of theory-driven studies of behaviour  
14 change in health professionals: 1) behavioural intention, 2) beliefs about capabilities, 3)  
15 social influences, 4) beliefs about consequences, and 5) moral norm (37). The score for  
16 each construct is computed as the average of each item (Likert scale of 1 to 7), except for  
17 social influence, which is rated on a Likert scale of 1 to 5 (28). There is no global score.  
18 Finally, in group discussions, we identified barriers and facilitators to including sex and  
19 gender considerations in caring for patients with T2D and depression and mapped them  
20 onto the TDF. The TDF was developed through a consensus of experts who consolidated  
21 33 psychosocial theories of behaviour change to generate 14 domains (40).  
22  
23  
24  
25  
26  
27  
28  
29  
30  
31

### 32 **Data collection**

33  
34 Quantitative data were collected post-intervention with the CPD-Reaction questionnaire  
35 and sociodemographic questions (38). Semi-structured qualitative discussion took place  
36 in both innovation and control groups after the questionnaires were completed so as not  
37 to influence quantitative results. In both innovation and control groups, discussions were  
38 recorded and transcribed.  
39  
40  
41  
42  
43

### 44 **Analysis**

#### 45 **Quantitative analysis**

46  
47 Categorical variables were described by reporting absolute (n) and relative (%)  
48 frequencies. Continuous variables were described by their measure of central tendency  
49 (mean and/or median) and dispersion (standard deviation and percentiles). Covariance  
50 analysis was used to compare the scores of the innovation and control groups. As the  
51 intention did not have a perfectly Gaussian distribution, we also compared intention  
52  
53  
54  
55  
56  
57  
58  
59  
60

1  
2  
3 scores using Wilcoxon's non-parametric analysis and used the Kruskal-Wallis test to  
4 compare medians. We used Spearman's rank test to assess the correlation between the  
5 intention scores and psychosocial factors (social influence, beliefs about capabilities,  
6 moral norms, beliefs about consequences). We used general linear models to assess  
7 whether the intention score varied significantly from the control group to innovation  
8 group after adjusting for confounding factors. These factors were identified using the 10%  
9 change in the regression coefficient associated with the exposure variable (41, 42).  
10 However, to increase the appearance validity of the model, we constructed a separate  
11 model in which we forced age, gender and practice environment. SAS software (version  
12 9.4) was used for all statistical analyses. The empirical significance threshold (P value)  
13 was set at 0.05 in bilateral analysis.  
14  
15  
16  
17  
18  
19  
20  
21  
22

### 23 **Qualitative analysis**

24  
25 The discussion transcripts were imported into NVivo V.12 for analysis. Using the TDF  
26 as a guide, two researchers reviewed and agreed on codes and data were simultaneously  
27 coded using a thematic deductive approach (ADT, AGo) (43). Data were then refined into  
28 TDF domains. As the discussion occurred in French, all illustrative quotes were translated  
29 into English by a master's student (ADT) and reviewed by a scientific translator. We  
30 calculated the frequency of each barrier and facilitator by recording the number of times  
31 it was mentioned in the four group discussions (GDs 1 to 4).  
32  
33  
34  
35  
36  
37

### 38 **Triangulating quantitative and qualitative data**

39  
40 We triangulated quantitative and qualitative data to propose practical theory-driven  
41 recommendations for improving our CPD innovation (44). We compared the five  
42 psychosocial determinants measured in the CPD-Reaction questionnaire to the domains  
43 of the TDF. We observed where quantitative and qualitative data converged, where they  
44 offered additional information on the same constructs, and where they diverged. We  
45 derived recommendations using the COM-B model of behaviour (45). COM-B proposes  
46 three criteria essential for a behaviour to occur: capacity, opportunity and motivation (46).  
47 The subcategories of these criteria can be linked to the TDF domains and their associated  
48 barriers or facilitators. The COM-B also proposes nine intervention functions assigned to  
49 TDF domains that can prompt behaviour change: education, persuasion, incentivisation,  
50  
51  
52  
53  
54  
55  
56  
57  
58  
59  
60

coercion, training, restriction, environmental restructuring, modelling and enablement (31, 45, 47). Recommendations were made by identifying which of these intervention functions matched our results and then selecting relevant function-associated behaviour change techniques (45).

## RESULTS

### Recruitment and participant characteristics

We offered the 12 CPD courses (i.e. six innovation/control pairs) in each of three Canadian provinces: Quebec, Ontario and New Brunswick. Four pairs of courses were held in Quebec (two in Montreal, October 10<sup>th</sup> 2018 and October 30<sup>th</sup> 2019, and two in Quebec City, October 17<sup>th</sup> 2019 and January 29<sup>th</sup> 2019), one in Ontario (Ottawa, November 8<sup>th</sup> 2019) and one in New-Brunswick (Moncton, October 4<sup>th</sup> 2019).

**Figure 1** illustrates the flow of participants. The participation rate (ratio of users who participated in the study to those who took the training) was 71% (127/178). Forty-nine of 92 questionnaires were analysed from the innovation groups and 78 of 86 from the control groups. Most participants were under 44 years old (n=80, 63%), women (n=101, 79.5%), practised in French (n=86, 67.7%), in Quebec (n=85, 66.9%) and in an urban setting (n=100, 78.8%) (**Table 1**).

**Table 1:** Sociodemographic characteristics of the participants in innovation and control groups

|                            | TOTAL     | Innovation Group | Control Group |
|----------------------------|-----------|------------------|---------------|
| <b>No. of Participants</b> | 127       | 49               | 78            |
| <b>Age (years)*</b>        |           |                  |               |
| <44                        | 80 (63.0) | 28 (57.1)        | 52 (66.7)     |
| ≥ 45                       | 42 (33.1) | 19 (38.8)        | 23 (29.5)     |
| Missing data               | 5 (3.9)   | 2 (4.1)          | 3 (3.8)       |

**Gender\***

|              |            |           |           |
|--------------|------------|-----------|-----------|
| Women        | 101 (79.5) | 40 (81.6) | 61 (78.2) |
| Men          | 19 (15.0)  | 7 (14.3)  | 12 (15.4) |
| Missing data | 7 (5.5)    | 2 (4.1)   | 5 (6.4)   |

**Language of practice\***

|              |           |           |           |
|--------------|-----------|-----------|-----------|
| French       | 86 (67.7) | 32 (65.2) | 54 (69.2) |
| Other        | 36 (28.3) | 15 (30.6) | 21 (26.9) |
| Missing data | 5 (4.0)   | 2 (4.1)   | 3 (3.9)   |

**Province of practice**

|               |           |           |           |
|---------------|-----------|-----------|-----------|
| Quebec        | 85 (66.9) | 31 (63.2) | 54 (69.3) |
| Ontario       | 18 (14.2) | 9 (18.4)  | 9 (11.5)  |
| New Brunswick | 16 (12.6) | 7 (14.3)  | 9 (11.5)  |
| Missing data  | 8 (6.3)   | 2 (4.1)   | 6 (7.7)   |

**Practice environment\***

|              |            |           |           |
|--------------|------------|-----------|-----------|
| Urban        | 100 (78.8) | 39 (79.6) | 61 (78.2) |
| Rural        | 14 (11.0)  | 4 (8.2)   | 10 (12.8) |
| Missing data | 13 (10.2)  | 6 (12.2)  | 7 (9.0)   |

---

\*n(%)

**Quantitative results*****Feasibility***

We recruited a total of 127 participants, a 41% increase from our target of 90 participants. Collaborators and executive committee members remained involved throughout the project. We held monthly executive committee meetings as planned. Our CPD trainings

1  
2  
3 were held in the three provinces as planned. We gave 12 courses instead of the six initially  
4 planned, as additional organisations in Quebec City (n=1) and Montreal (n=2) showed  
5 interest. Due to time constraints imposed by CME settings, completing 1.5 hours (45-min  
6 course, 15-min evaluation and 30-min discussion) in all settings was not possible, therefore  
7 we held the group discussions in only two out of the six settings (Montreal and Ottawa).  
8  
9

### 10 11 12 ***Behavioural Intention***

13  
14  
15 The innovation aims to influence behaviour by modifying intention and its psychosocial  
16 determinants. For example, the innovation could change beliefs about capabilities (or  
17 confidence) by increasing health professionals' knowledge about the desired behaviour.  
18 **Table 2** shows scores for intention and its psychosocial determinants for innovation and  
19 control groups as evaluated using the CPD-Reaction questionnaire. Mean difference  
20 between innovation and control scores for the four psychosocial determinants of behaviour  
21 change influencing intention were: MD=0.16 for social influence (95% CI: -0.26, 0.58),  
22 MD=0.63 for belief about capabilities (95% CI: 0.21, 1.06), MD=0.25 for moral norm  
23 (95% CI: -0.21, 0.72) and MD=0.22 for belief about consequences (95% CI: -0.23, 0.67).  
24 The mean intention score for including sex and gender considerations in patient care was  
25 higher in the innovation than in the control group, i.e. 5.65 ( $\pm$  0.19) versus 5.19 ( $\pm$ 0.15), on  
26 a scale from 1 (low) to 7 (high). The mean difference between the two groups was -0.47  
27 (95% CI: -0.95, 0.01), with a p-value of 0.06 (**Supplementary table 1**). No statistically  
28 significant differences were observed for the remaining four psychosocial determinants.  
29 Bivariate analysis showed that the higher median for intention was significantly associated  
30 with age over 45 (p=0.03) and a rural practice environment (p=0.02) (**Supplementary**  
31 **table 1**). After adjusting for age, gender and practice environment, the mean difference in  
32 intention between the two groups was statistically significant: -0.57 (95% CI: -1.09, -0.05),  
33 with a p-value of 0.03 (**Table 3**).  
34  
35  
36  
37  
38  
39  
40  
41  
42  
43  
44  
45  
46  
47

48 **Table 2:** CPD-Reaction questionnaire mean scores  
49

|                     | Total | Innovation | Control | Difference<br>(95% CI) |
|---------------------|-------|------------|---------|------------------------|
| No. of participants | 127   | 49         | 78      | -                      |

| <b>Psychosocial determinants – score range (1 to 7)*</b> |                   |                   |                   |                    |
|----------------------------------------------------------|-------------------|-------------------|-------------------|--------------------|
| Social influence                                         | 4.62 (4.42; 4.83) | 4.72 (4.44; 5.00) | 4.56 (4.27; 4.85) | 0.16 (-0.26; 0.58) |
| Beliefs about capabilities                               | 5.1 (4.90; 5.33)  | 5.50 (5.27; 5.74) | 4.87 (4.56; 5.17) | 0.63 (0.21; 1.06)  |
| Moral norm                                               | 5.90 (5.69; 6.13) | 6.06 (5.80; 6.32) | 5.81 (5.48; 6.14) | 0.25 (-0.21; 0.72) |
| Beliefs about consequences                               | 5.68 (5.46; 5.90) | 5.82 (5.52; 6.11) | 5.60 (5.28; 5.91) | 0.22 (-0.23; 0.67) |
| <b>Intention*</b>                                        | 5.37 (5.13; 5.60) | 5.65 (5.36; 5.95) | 5.19 (4.85; 5.52) | 0.47 (-0.01; 0.95) |

\*Mean (95% CI) ;

**Table 3:** Mean difference of the intention score between innovation and control groups

|            | <b>Model 1*</b>       |                | <b>Model 2†</b>        |                | <b>Model 3‡</b>        |                |
|------------|-----------------------|----------------|------------------------|----------------|------------------------|----------------|
|            | <b>β (95% CI)</b>     | <b>P Value</b> | <b>β (95% CI)</b>      | <b>P Value</b> | <b>β (95% IC)</b>      | <b>P Value</b> |
| Control    | Reference             |                | Reference              |                | Reference              |                |
| Innovation | -0.47<br>(-0.95;0.01) | <b>0.057</b>   | -0.61<br>(-1.10;-0.12) | <b>0.015</b>   | -0.57<br>(-1.09;-0.05) | <b>0.031</b>   |

95% CI, confidence interval at 95%;

\*Non-adjusted;

†Adjusted for age and gender;

‡Adjusted for age, gender and environment of practice.

### Qualitative findings

Due to time constraints imposed by CME settings, we held the group discussions in two out of the six settings, Montreal, October 30<sup>th</sup> 2019 and Ottawa, November 8<sup>th</sup> 2019. Thus



four semi-structured group discussions (GD1, GD2, GD3, GD4) were conducted and 67 health professionals participated, reporting a variety of barriers and facilitators (**Table 4**).

**Table 4:** Mapping facilitators and barriers to the Theoretical Domains Framework (TDF) with illustrative quotes and frequencies

| TDF DOMAIN                        | FACILITATOR/ BARRIER                                                                                   | ILLUSTRATIVE QUOTES*                                                                                                                                                                                                                                                                                                                                                                  | FREQUENCIES** (N=4 groups) |
|-----------------------------------|--------------------------------------------------------------------------------------------------------|---------------------------------------------------------------------------------------------------------------------------------------------------------------------------------------------------------------------------------------------------------------------------------------------------------------------------------------------------------------------------------------|----------------------------|
| <b>Skills</b>                     | The health professional acknowledges different treatment methods by gender (Facilitator)               | “Dominique, is that a man or a woman? ... Because they are probably not treated the same” (GD4)                                                                                                                                                                                                                                                                                       | 4                          |
|                                   | The health professional acknowledges different clinical representation by gender (Facilitator)         | “...I work as a nurse in cardiac and pulmonary rehabilitation, and ... it is a fact, that women come less [to rehabilitation programs] in general than men. Women often will quit [rehabilitation] or they won't come because they're taking care of everyone. But something happens [illness] and then they don't have time to take care of themselves, because it's too much” (GD3) | 1                          |
|                                   | The health professional assumed the gender of the patient when analysing a clinical vignette (Barrier) | “I assumed that it was a guy” (GD3) / “I presumed that it was a girl!” (GD4)                                                                                                                                                                                                                                                                                                          | 3                          |
| <b>Beliefs about Capabilities</b> | The health professional feels he/she can accurately observe the phenotype of the patient (Facilitator) | “At the first contact we have with a patient ... we see the phenotype there without talking about gender, it's one of the things that jumps out at you when you're taking notes.” (GD3)                                                                                                                                                                                               | 3                          |
| <b>Social influences</b>          | The health professionals assume the patient's gender based on his/her societal role (Barrier)          | “I heard ‘civil servant’, I don't know, in my head I was like ‘civil servant’, so it's a man.” (GD4)                                                                                                                                                                                                                                                                                  | 3                          |
| <b>Knowledge</b>                  | The health professional knows the differences between sex and gender in scientific                     | “Yes, that's it actually, the biological aspect you certainly take into account in the study, but we are talking about the [social] categories of sex and gender... And                                                                                                                                                                                                               | 2                          |



|                                                 |                                                                                                                                               |                                                                                                                                                                                                              |   |
|-------------------------------------------------|-----------------------------------------------------------------------------------------------------------------------------------------------|--------------------------------------------------------------------------------------------------------------------------------------------------------------------------------------------------------------|---|
|                                                 | physicians towards a patient may be different according to sex and gender (Barrier)                                                           | [referring to the bias in the language to describe 'your' depression versus 'our' diabetes]                                                                                                                  |   |
| <b>Social/Professional Role and Identity</b>    | The health professional reflects positively on his/her relationship with the patient (Facilitator)                                            | "I work in an exclusively white environment, and I am the only black person, and I have no problem whether [the patient] is male, female or a child" (GD3)                                                   | 1 |
| <b>Intentions</b>                               | The health professional has the intention to change his/her therapeutic approach by considering the differences of gender (Facilitator)       | "With the information that I have here [clinical description of vignette], if I had 'menopausal woman', then I think I would have researched more, but with what I had here, I didn't [see the need]." (GD4) | 1 |
|                                                 | The health professional does not have the intention to change his/her therapeutic approach by considering the differences of gender (Barrier) | "With what I have here [descriptive information of the clinical vignette], I am not sure to what extent I would have changed my approach" (GD4)                                                              | 1 |
| <b>Goals</b>                                    | The health professional does not perceive the integration of the concepts of sex and gender in clinical practice as a priority (Barrier)      | "It wasn't important ... the most important, [but] that doesn't mean that [the lack of sex and gender consideration in the clinical vignette] wasn't perceived" (GD4)                                        | 1 |
| <b>Memory, Attention and Decision Processes</b> | The health professional does not consider that sex and gender are necessary parts of the decision-making process (Barrier)                    | "If it is not obvious, we are not inclined to do it... [take into consideration the sex and gender of the patient]" (GD2)                                                                                    | 1 |

\*Free translation from French

\*\*The number of times that the barrier/facilitator appeared in the transcript

### ***Barriers and facilitators mapped to the TDF domains***

Ten barriers mapped to nine of the 14 TDF domains and seven facilitators mapped onto six of the domains. The most frequent barriers were related to Skills (e.g. failing to consider a

1  
2  
3 patient's gender) (n=3) and to Social Influence (e.g. making gender assumptions about  
4 employment) (n=3). The most frequent facilitators were also related to Skills (n=4) (**Table**  
5 **4**).  
6  
7

8  
9 We mapped to the Skills domain when the participants asked whether their patient was a  
10 woman or man before analysing the clinical vignette, or else failed to ask the question (the  
11 fictive name of the patient – Dominique – was strategically ambiguous). Thus, failure to  
12 ask was coded as a barrier, and asking was coded as a facilitator. Discussion about  
13 information on sex and/or gender was coded as a facilitator in the Knowledge domain, but  
14 reporting differentiating between women and men patients in clinical practice was coded  
15 as a facilitator in the Skills domain. When participants reported not needing to know the  
16 patient's gender because this information would not have changed their intervention, we  
17 mapped the barrier to Beliefs about consequences domain. Participants documented some  
18 differences between men and women patients in their clinical practice, demonstrating  
19 ability acquired through practice to include sex and gender considerations. Participants also  
20 reported they did not ask the sex of the patient in the clinical vignette as they automatically  
21 observe a patient's sex in practice, so didn't feel the need to mention it in this context. This  
22 facilitator was mapped to the domain beliefs about capabilities (n=3). Some participants  
23 reported that they routinely observe and record a patient's sex when taking notes. This  
24 facilitator was mapped to the domain environmental context and resources, since it this is  
25 an institutional practice reflecting an organisational clinical culture, and could foster  
26 further awareness and consideration of sex and gender (**Table 4**).  
27  
28  
29  
30  
31  
32  
33  
34  
35  
36  
37  
38  
39  
40

### 41 **Triangulation**

42  
43 CPD-Reaction psychosocial variables matched barriers that mapped onto to the TDF  
44 domains beliefs about consequences, social influence and intentions. CPD-Reaction  
45 psychosocial variables also matched facilitators that mapped onto to the TDF domains  
46 beliefs about capabilities and intentions. We identified six additional psychosocial  
47 variables from the TDF: knowledge, skills, goal, memory, attention and decision processes,  
48 environmental context and resources, social/professional role and identity. Results of  
49 triangulation were summarised with consequent recommendations (**Supplementary table**  
50 **2**). Recommendations for improving the CPD training were based on behaviour change  
51  
52  
53  
54  
55  
56  
57  
58  
59  
60

1  
2  
3 techniques associated with the following functions: modelling, training, environmental  
4 restructuring, enablement, education and goal settings (**Supplementary table 2**) (45).  
5 Training (n=5) and education (n=4) were the most frequent functions used in the  
6 recommendations.  
7  
8  
9

## 10 **DISCUSSION**

11  
12  
13 We assessed the feasibility and impact of including sex and gender considerations in a CPD  
14 course on T2D and depression care on health professionals' intention to include sex and  
15 gender considerations in patient care. Recruited CPD organisations, collaborators and  
16 patient-partners stayed engaged throughout the study. All planned activities occurred and  
17 71% of targeted health professionals participated. The intention to include sex and gender  
18 considerations in patient care was higher in the innovation group, and statistically  
19 significant when controlling for age, gender, and practice sites. Barriers were mostly  
20 related to skills and social influence and facilitators to skills and beliefs about capabilities.  
21 We triangulated results and produced recommendations for improving the CPD course.  
22 The following observations could enable CPD organisations to systematically improve  
23 CPD by integrating sex and gender considerations into their existing material.  
24  
25  
26  
27  
28  
29  
30  
31

32  
33 First, all our predetermined feasibility criteria were met. In fact, due to increased interest  
34 in the topic, we recruited more participants and gave more CPD activities than planned.  
35 Recruitment may also have improved because we involved stakeholders early on in the  
36 research process, including in applying for the grant. Early engagement of stakeholders has  
37 been associated elsewhere with more successful recruitment (48). Therefore, elements that  
38 should be considered when designing similar CPD activities include, but are not limited to:  
39 1) successful collaboration and co-creation with CPD organisations early on including  
40 during grant writing, 2) offering CME accreditation for the CPD activities, 3) the duration  
41 of the training, and 4) the evidence base relevant to the clinical topic (49).  
42  
43  
44  
45  
46  
47  
48

49 Second, the CPD course that included sex and gender considerations increased health  
50 professionals' intention to include sex and gender considerations in patients' care. This  
51 may suggest a significant knowledge gap among participants. Studies show that health  
52 professionals lack knowledge of sex and gender differences in disease manifestation and  
53 outcomes and fail to recognize the gender constraints that their patients face (50-53). For  
54  
55  
56  
57  
58  
59  
60

1  
2  
3 example, in a cross-sectional survey of physicians (71% male), 55% said that the medical  
4 curriculum did not adequately prepare them for dealing with sexual health problems,  
5 particularly those of female patients (50). In another study, only 49% of primary care  
6 physicians (n=200, 65% male) and 59% of cardiologists (n=100, 85% male) reported that  
7 their training prepared them to assess female patients' cardiovascular risk (52). Our study  
8 represents a promising avenue for rectifying these gaps. Furthermore, bivariate analyses of  
9 the between-group difference in the intention scores yielded significant results in older, but  
10 not younger, participants and in those practising in rural area. Their age and geographical  
11 isolation perhaps reduced their exposure to sex and gender issues, which have only been  
12 included in medical curricula since they qualified (53). They may also have less access to  
13 CPD training due to isolation, poor technological resources, low financial support (54, 55)  
14 and geographical variations in medical practice styles (56, 57). Future studies could further  
15 investigate the perceptions of health professionals in rural settings on age and gender. They  
16 could also document if patients experience geographical differences in care regarding sex  
17 and gender. Training could target older and rural health professionals, who seemed more  
18 open to modifying their clinical practice.  
19  
20  
21  
22  
23  
24  
25  
26  
27  
28  
29  
30

31 Third, beliefs about capabilities as a facilitator showed the strongest mean difference  
32 between the innovation and control groups. These results are consistent with a literature  
33 review of 277 studies showing that the mechanisms of action most frequently associated  
34 with behaviour change techniques are beliefs about capabilities and intention (58). Adding  
35 a practical component to the CPD course could strengthen beliefs about capabilities. Also,  
36 several barriers and facilitators to considering sex and gender in patient care were  
37 identified. Our qualitative analysis showed that participants did not consider integrating  
38 sex and gender into clinical practice as a priority, with social influences emerging as an  
39 important barrier. The social influence score as measured by CPD-Reaction also showed  
40 the lowest impact (MD=0.16), suggesting that the training did not address this factor (Table  
41 2). A CPD course could offer a reflective segment on how social influence could be  
42 affecting their clinical practice (57, 59). Furthermore, belief about consequences had one  
43 of the lowest MD (0.22) of the five psychosocial determinants, and one associated barrier  
44 (n=2). This could be remedied by focusing more on the consequences of not integrating  
45 sex and gender into clinical practice (51).  
46  
47  
48  
49  
50  
51  
52  
53  
54  
55  
56  
57  
58  
59  
60

1  
2  
3 Finally, in spite of the low priority given to sex and gender by our participants, qualitative  
4 analysis demonstrated that opportunities already exist for integrating these considerations  
5 into practice, such as the routine documenting of the patient's sex. CPD strategies could  
6 make more of these opportunities (60). For example, CPD activities could advocate for  
7 sex- and gender-adapted care when treating men and women for diabetes and depression.  
8 Indeed, specific attention could be given to diabetic foot care when treating men, while  
9 specific attention could be given to blood-glucose regulation and to family and lifestyle  
10 issues when treating women (7, 61).

11  
12 This innovation could be adapted to medical fields other than T2D and depression, and to  
13 other countries and areas outside French-speaking provinces of Canada. While many of the  
14 barriers participants mentioned were culture- and language-specific to the Quebec or  
15 francophone context, many other languages (e.g. Spanish, German, Italian, and  
16 Portuguese) also generalise everything to the masculine gender, suggesting shared  
17 linguistic barriers. However, each culture has highly specific sex and gender norms  
18 affecting physicians' clinical assumptions (62). Our qualitative results highlight the fact  
19 that CPD on sex and gender considerations must be tailored to specific cultural contexts  
20 (17) and incorporate sex- and gender-based analysis tools (63).

21  
22 Our study has a few limitations. As we used a single post-intervention measure, we cannot  
23 attribute the difference between the two groups solely to the innovation. However, our  
24 analysis suggests that those who completed the innovation increased their intention, as well  
25 as increasing all four psychosocial predictors, suggesting an association with the  
26 innovation. Second, the fact that participants could choose which course to attend  
27 (according to conference guidelines), and hence the non-randomised nature of the study,  
28 may have biased our feasibility findings. Third, the training was given by teachers of  
29 different genders for the innovation and control groups (a woman in the innovation group  
30 and a man in the control group). As a bias could have been introduced owing to differences  
31 in communication styles between men and women, the teaching teams practised the courses  
32 several times to ensure that teaching methods were equivalent. In addition, we ensured the  
33 teachers stayed with their respective groups for the six data collections. Fourth, due to  
34 ethics guidelines, we only analysed questionnaires completed by participants who had also  
35  
36  
37  
38  
39  
40  
41  
42  
43  
44  
45  
46  
47  
48  
49  
50  
51  
52  
53  
54  
55  
56  
57  
58  
59  
60



1  
2  
3 signed consent forms. Although the human resources for both groups were the same  
4 (trainer, research-assistant and patient-partners), the control group had an extra team  
5 member, resulting in unequal numbers of participants who signed consent in each group.  
6  
7 The presence of this extra member could also explain the difference in the number of  
8 questionnaires collected in the two groups. Fifth, our study had low participation rates,  
9 although it did meet our feasibility target sample size given the logistical and contextual  
10 constraints. Recruitment followed the way CPD activities are usually publicised in large  
11 organisations (a scattershot approach that includes posters, calendars, mass emailing), thus  
12 the participation rate did not necessarily reflect a lack of interest. Our study approach was  
13 pragmatic, i.e. it took place in a real CPD training setting. This pragmatic study will inspire  
14 other health services researchers and implementation scientists to collaborate with CPD  
15 stakeholders and knowledge users to embed their studies in real CPD training settings.  
16  
17 Sixth, although there is evidence that intention is an effective determinant for measuring  
18 behaviour change (39), it is limited as a proxy. Finding other reliable measures of  
19 behaviour change is challenging (64). However, identifying barriers and facilitators to  
20 change is a first step (64). Semi-structured group discussions using a clinical vignette have  
21 also been shown to contribute to clinical behaviour change (64). Methods such as audit and  
22 feedback, as well as “commitment to change statements” could reduce the intention-  
23 behaviour gap and strengthen the understanding of clinical changes following CPD  
24 activities (65, 66). Lastly, our discussion groups attracted many participants, limiting both  
25 participants’ opportunity to speak and the depth of the discussion. Our mixed-methods  
26 approach is a strength of this study and our findings support the feasibility of a randomised  
27 trial informed by identified barriers and facilitators.  
28  
29  
30  
31  
32  
33  
34  
35  
36  
37  
38  
39  
40  
41  
42

## 43 CONCLUSION

44  
45  
46 A CPD course with sex and gender considerations is feasible and well received by health  
47 professionals. The significant between-group difference in the intention scores suggests the  
48 innovation had a favorable impact on health professionals’ intention to include sex and  
49 gender considerations when caring for their patients with T2D and depression. However,  
50 caution is required in interpreting our results as this effect may be attributed to other  
51 sources given the non-randomised nature of our study. Future randomised controlled trials  
52  
53  
54  
55  
56  
57  
58  
59  
60



1  
2  
3 are needed to control for potential selection biases to confirm our results and identify  
4 barriers and facilitators in sex- and gender-adapted diabetes and depression care. Our  
5 findings will inform future CPD initiatives that address this topic and other inequities in  
6 health care pertaining to sex and gender.  
7  
8  
9  
10  
11  
12  
13  
14  
15  
16  
17  
18  
19  
20  
21  
22  
23  
24  
25  
26  
27  
28  
29  
30  
31  
32  
33  
34  
35  
36  
37  
38  
39  
40  
41  
42  
43  
44  
45  
46  
47  
48  
49  
50  
51  
52

### 53 **Figure Legend**

54  
55 **Figure 1:** Flowchart of participants  
56  
57  
58  
59  
60

1  
2  
3 \*This is an approximate figure given the changing dynamics of the hospital's professional  
4 environment; an email was sent to 2000 employees including healthcare professionals,  
5 others were invited using posters in the training sites, oral communication at a meeting  
6 with the organizing team of the clinical setting, and announcements in Médecins  
7 francophones du Canada's conference calendar.  
8  
9  
10  
11  
12  
13  
14  
15  
16  
17  
18  
19  
20  
21  
22  
23  
24  
25  
26  
27  
28  
29  
30  
31  
32  
33  
34  
35  
36  
37  
38  
39  
40  
41  
42  
43  
44  
45  
46  
47  
48  
49  
50  
51

## 52 **Acknowledgements**

53  
54  
55  
56  
57  
58  
59  
60

1  
2  
3 We thank the members of the mATrICES-F Group for their involvement in this project.

4 We also thank Louisa Blair for editing this manuscript.

5  
6  
7 **Collaborators mATrICES-F Group:**

8  
9 Alèxe Deom Tardif, Université Laval

10  
11 Amédé Gogovor, Université Laval

12  
13 André Bilodeau, McGill University

14  
15 André Bussièrès, McGill University

16  
17 André Gaudreau, Patient-partner

18  
19 Audrey Ferron Parayre, University of Ottawa

20  
21 Caroline Jose, Université de Moncton

22  
23 Danièle Remy-Lamarche, Patient-partner

24  
25 Dawn Stacey, University of Ottawa

26  
27 Denis Audet, University Family Medicine Group Saint-François-d'Assise

28  
29 Denis Prud'homme, Université de Moncton

30  
31 France Légaré, Université Laval

32  
33 Francine Borduas, Médecins francophones du Canada

34  
35 Gerard Ngueta, VITAM – Centre de recherche en santé durable

36  
37 Geneviève Roch, Université Laval

38  
39 Hélène Lee-Gosselin, Université Laval

40  
41 Isabelle Auclair, Université Laval

42  
43 Laurie Laplanche, Université Laval

44  
45 Luc Vigneault, Patient-partner

46  
47 Maman Joyce Dogba, Université Laval

1  
2  
3 Marie-Claude Tremblay, Université Laval  
4

5 Marie-Pierre Gagnon, Université Laval  
6

7  
8 Nicole Parent, Médecins francophones du Canada  
9

10 Sabrina Guay-Bélanger, VITAM – Centre de recherche en santé durable  
11

12 Sophie Desroches, Université Laval  
13

14 Valérie Borde, Centre DECLIC  
15

### 16 17 **Contributors** 18

19  
20 ADT, AGo, SGB, FL, NP and AB conceived and designed the study. ADT, AGo, SGB,  
21 DA, AGa, DRL, LV and FL participated to data collection. ADT, AGo, SGB, GN and FL  
22 participated to data analysis. All authors critically revised the interpretation of data. ADT,  
23 AGo, SGB and FL drafted the manuscript. All authors and members of the mATrICES-  
24 F Group read, provided feedback and approved the final manuscript.  
25  
26  
27  
28

### 29 **Funding** 30

31 This work was supported by the Canadian Institutes of Health Research, grant number  
32 201702IGK-384530-IGK-CFBA-19158. AGo is funded by a CIHR Patient-Oriented  
33 Research fellowship. FL holds a Tier 1 Canada Research Chair in Shared Decision Making  
34 and Knowledge Translation.  
35  
36  
37  
38

### 39 **Disclaimer** 40

41 The findings and views are those of the authors.  
42  
43

### 44 **Competing interests** 45

46 None declared.  
47  
48

### 49 **Patient consent for publication** 50

51 Not applicable.  
52  
53

### 54 **Ethics approval** 55 56 57 58 59 60

Centre intégré universitaire de santé et de services sociaux de la Capitale-Nationale (CIUSSS-CN) Ethics Board (2017-2018-16 MP), the Hôpital Montfort Research ethics board (19-20-05-009), Vitalité health network research ethics board (CER-2019-18).

### **Provenance and peer review**

Not commissioned; externally peer reviewed.

### **Patient consent for publication**

Not required.

### **Data sharing statement**

Data are available upon reasonable request.

### **References**

1. Clayton JA, Tannenbaum C. Reporting Sex, Gender, or Both in Clinical Research? *JAMA*. 2016;316(18):1863.
2. Institut de recherche en santé du Canada. Comment intégrer le sexe et le genre à la recherche 2019 [Available from: <http://cihr-irsc.gc.ca/f/50836.html>].
3. Johnson JL, Greaves L, Repta R. Better science with sex and gender: Facilitating the use of a sex and gender-based analysis in health research. *International Journal for Equity in Health*. 2009;8(1):14.
4. Oliffe J, Greaves L. *Designing and Conducting Gender, Sex, and Health Research*. Thousand Oaks, California 2012. Available from: <http://sk.sagepub.com/books/designing-and-conducting-gender-sex-and-health-research>.
5. Légaré F, Lee-Gosselin H, Borduas F, Monette C, Bilodeau A, Tanguay D, et al. Approaches to considering sex and gender in continuous professional development for health and social care professionals: An emerging paradigm. *Medical Teacher*. 2018;40(9):875-9.
6. Tannenbaum C, Ellis RP, Eyssel F, Zou J, Schiebinger L. Sex and gender analysis improves science and engineering. *Nature*. 2019;575(7781):137-46.
7. Kautzky-Willer A, Harreiter J, Pacini G. Sex and Gender Differences in Risk, Pathophysiology and Complications of Type 2 Diabetes Mellitus. *Endocrine Reviews*. 2016;37(3):278-316.
8. Geary N. Counterpoint: physiologists should not distinguish “sex” and “gender”. *American Journal of Physiology-Regulatory, Integrative and Comparative Physiology*. 2010;298(6):R1702-R4.

- 1
- 2
- 3
- 4 9. Demmer RT, Gelb S, Suglia SF, Keyes KM, Aiello AE, Colombo PC, et al. Sex
- 5 Differences in the Association Between Depression, Anxiety, and Type 2 Diabetes
- 6 Mellitus. 2015;77(4):467-77.
- 7 10. Kuehner C. Why is depression more common among women than among men?
- 8 *Lancet Psychiatry*. 2017;4(2):146-58.
- 9 11. Turecki G, Brent DA. Suicide and suicidal behaviour. *The Lancet*.
- 10 2016;387(10024):1227-39.
- 11 12. Zhuang QS, Shen L, Ji HF. Quantitative assessment of the bidirectional
- 12 relationships between diabetes and depression. *Oncotarget*. 2017;8(14):23389-400.
- 13 13. Ali S, Stone MA, Peters JL, Davies MJ, Khunti K. The prevalence of co-morbid
- 14 depression in adults with Type 2 diabetes: a systematic review and meta-analysis.
- 15 *Diabetic Medicine*. 2006;23(11):1165-73.
- 16 14. Ahmad A, Abujbara M, Jaddou H, Younes NA, Ajlouni K. Anxiety and
- 17 Depression Among Adult Patients With Diabetic Foot: Prevalence and Associated
- 18 Factors. *Journal of clinical medicine research*. 2018;10(5):411-8.
- 19 15. Toker S, Shirom A, Melamed S. Depression and the metabolic syndrome: gender-
- 20 dependent associations. *Depression and anxiety*. 2008;25(8):661-9.
- 21 16. Möller-Leimkühler AM. Gender differences in cardiovascular disease and
- 22 comorbid depression. *Dialogues in clinical neuroscience*. 2007;9(1):71-83.
- 23 17. Coen S BE. What a Difference Sex and Gender Make: A gender, Sex and Health
- 24 Research Casebook. Vancouver; 2012.
- 25 18. Gilbert-Ouimet M, Trudel X, Aubé K, Ndjaboue R, Duchaine C, Blanchette C, et
- 26 al. Differences between women and men in the relationship between psychosocial
- 27 stressors at work and work absence due to mental health problem. *Occupational and*
- 28 *Environmental Medicine*. 2020;77(9):603-10.
- 29 19. Deisinger C, Dervic E, Leutner M, Kosi-Trebotic L, Klimek P, Kautzky A, et
- 30 al. Diabetes mellitus is associated with a higher risk for major depressive disorder in
- 31 women than in men. *BMJ Open Diabetes Research & Care*. 2020;8(1):e001430.
- 32 20. Tannenbaum C, Greaves L, Graham ID. Why sex and gender matter in
- 33 implementation research. *BMC Medical Research Methodology*. 2016;16(1).
- 34 21. Tannenbaum C, Clow B, Haworth-Brockman M, Voss P. Sex and gender
- 35 considerations in Canadian clinical practice guidelines: a systematic review. *CMAJ*
- 36 *Open*. 2017;5(1):E66-E73.
- 37 22. Ferlie EB, Shortell SM. Improving the quality of health care in the United
- 38 Kingdom and the United States: a framework for change. *Milbank Q*. 2001;79(2):281-
- 39 315.
- 40 23. Davis D, Evans M, Jadad A, Perrier L, Rath D, Ryan D, et al. The case for
- 41 knowledge translation: shortening the journey from evidence to effect. *Bmj*.
- 42 2003;327(7405):33-5.
- 43 24. Davis D, Galbraith R. Continuing Medical Education Effect on Practice
- 44 Performance. *Chest*. 2009;135(3):42S-8S.
- 45 25. Institute of Medicine. Redesigning Continuing Education in the Health
- 46 Professions. Washington, DC: The National Academies Press; 2010. 296 p.
- 47 26. Godin G. Les comportements dans le domaine de la santé : Comprendre pour
- 48 mieux intervenir. Montréal, Québec: Les Presses de l'Université de Montréal 2012.
- 49
- 50
- 51
- 52
- 53
- 54
- 55
- 56
- 57
- 58
- 59
- 60

- 1
- 2
- 3
- 4 27. Ajzen I. The theory of planned behavior. *Organizational Behavior and Human Decision Processes*. 1991;50(2):179-211.
- 5
- 6 28. Légaré F, Borduas F, Freitas A, Turcotte S. User Manual – The Continuing Professional Development (CPD) Reaction Questionnaire. 2015.
- 7
- 8 29. Atkins L, Francis J, Islam R, O'Connor D, Patey A, Ivers N, et al. A guide to using the Theoretical Domains Framework of behaviour change to investigate implementation problems. *Implementation Science*. 2017;12(1).
- 9
- 10 30. Cane J, O'Connor D, Michie S. Validation of the theoretical domains framework for use in behaviour change and implementation research. *Implementation Science*. 2012;7(1):37.
- 11
- 12 31. Michie S, van Stralen MM, West R. The behaviour change wheel: A new method for characterising and designing behaviour change interventions. *Implementation Science*. 2011;6(1):42.
- 13
- 14 32. Eldridge SM, Chan CL, Campbell MJ, Bond CM, Hopewell S, Thabane L, et al. CONSORT 2010 statement: extension to randomised pilot and feasibility trials. *BMJ*. 2016;355:i5239.
- 15
- 16 33. Gogovor A MT, Etherington N, Colantonio A, Légaré F, on behalf of the GIKT Group. Sex and gender analysis in knowledge translation interventions: challenges and solutions. *Health Research Policy and Systems*. 2020;18(1):108.
- 17
- 18 34. Atlantis E, Fahey P, Foster J. Collaborative care for comorbid depression and diabetes: a systematic review and meta-analysis. *BMJ Open*. 2014;4(4):e004706.
- 19
- 20 35. Holt RI, de Groot M, Golden SH. Diabetes and depression. *Curr Diab Rep*. 2014;14(6):491.
- 21
- 22 36. Harreiter J, Fadl H, Kautzky-Willer A, Simmons D. Do Women with Diabetes Need More Intensive Action for Cardiovascular Reduction than Men with Diabetes? *Current diabetes reports*. 2020;20(11):61.
- 23
- 24 37. Légaré F, Freitas A, Turcotte S, Borduas F, Jacques A, Luconi F, et al. Responsiveness of a simple tool for assessing change in behavioral intention after continuing professional development activities. *PLOS ONE*. 2017;12(5):e0176678.
- 25
- 26 38. Légaré F, Borduas F, Freitas A, Jacques A, Godin G, Luconi F, et al. Development of a Simple 12-Item Theory-Based Instrument to Assess the Impact of Continuing Professional Development on Clinical Behavioral Intentions. *PLoS ONE*. 2014;9(3):e91013.
- 27
- 28 39. Godin G, Bélanger-Gravel A, Eccles M, Grimshaw J. Healthcare professionals' intentions and behaviours: A systematic review of studies based on social cognitive theories. *Implementation Science*. 2008;3(1):36.
- 29
- 30 40. Michie S. Making psychological theory useful for implementing evidence based practice: a consensus approach. *Quality and Safety in Health Care*. 2005;14(1):26-33.
- 31
- 32 41. Mickey R M GS. The Impact of Confounder Selection Criteria on Effect Estimation *American Journal of Epidemiology*. 1989;129(1):125-37.
- 33
- 34 42. Budtz-Jørgensen E, Keiding N, Grandjean P, Weihe P. Confounder selection in environmental epidemiology: assessment of health effects of prenatal mercury exposure. *Ann Epidemiol*. 2007;17(1):27-35.
- 35
- 36 43. Atkins L, Francis J, Islam R, O'Connor D, Patey A, Ivers N, et al. A guide to using the Theoretical Domains Framework of behaviour change to investigate implementation problems. *Implement Sci*. 2017;12(1):77.
- 37
- 38
- 39
- 40
- 41
- 42
- 43
- 44
- 45
- 46
- 47
- 48
- 49
- 50
- 51
- 52
- 53
- 54
- 55
- 56
- 57
- 58
- 59
- 60

- 1  
2  
3  
4  
5  
6  
7  
8  
9  
10  
11  
12  
13  
14  
15  
16  
17  
18  
19  
20  
21  
22  
23  
24  
25  
26  
27  
28  
29  
30  
31  
32  
33  
34  
35  
36  
37  
38  
39  
40  
41  
42  
43  
44  
45  
46  
47  
48  
49  
50  
51  
52  
53  
54  
55  
56  
57  
58  
59  
60
44. O'Cathain A, Murphy E, Nicholl J. Three techniques for integrating data in mixed methods studies. *Bmj*. 2010;341:c4587.
  45. Michie S, Atkins L, R. W. The behaviour change wheel : a guide to designing Interventions. Great Britain: Silverback Publishing; 2014.
  46. West R, Michie S. A brief introduction to the COM-B Model of behaviour and the PRIME Theory of motivation. *Qeios*. 2020.
  47. Agbadjé TT, Menear M, Dugas M, Gagnon M-P, Rahimi SA, Robitaille H, et al. Pregnant women's views on how to promote the use of a decision aid for Down syndrome prenatal screening: a theory-informed qualitative study. *BMC Health Services Research*. 2018;18(1).
  48. Garvelink MM, Freitas A, Menear M, Brière N, Stacey D, Légaré F. In for a penny, in for a pound: the effect of pre-engaging healthcare organizations on their subsequent participation in trials. *BMC Research Notes*. 2015;8(1):751.
  49. Little P, Hayes S. Continuing professional development (CPD): GPs' perceptions of post-graduate education-approved (PGEA) meetings and personal professional development plans (PDPs). 2003;20(2):192-8.
  50. Veloshnee G, Loveday P-K. Gender biases and discrimination: a review of health care interpersonal interactions 2007 [Available from: [https://www.who.int/social\\_determinants/resources/gender\\_biases\\_and\\_discrimination\\_wgkn\\_2007.pdf](https://www.who.int/social_determinants/resources/gender_biases_and_discrimination_wgkn_2007.pdf)].
  51. Mauvais-Jarvis F, Bairey Merz N, Barnes PJ, Brinton RD, Carrero J-J, Demeo DL, et al. Sex and gender: modifiers of health, disease, and medicine. *The Lancet*. 2020;396(10250):565-82.
  52. Bairey Merz CN, Andersen H, Sprague E, Burns A, Keida M, Walsh MN, et al. Knowledge, Attitudes, and Beliefs Regarding Cardiovascular Disease in Women: The Women's Heart Alliance. *J Am Coll Cardiol*. 2017;70(2):123-32.
  53. Kling JM, Rose SH, Kransdorf LN, Viggiano TR, Miller VM. Evaluation of sex- and gender-based medicine training in post-graduate medical education: a cross-sectional survey study. *Biology of Sex Differences*. 2016;7(S1).
  54. Curran VR, Fleet L, Kirby F. Factors influencing rural health care professionals' access to continuing professional education. *Aust J Rural Health*. 2006;14(2):51-5.
  55. Berndt A, Murray CM, Kennedy K, Stanley MJ, Gilbert-Hunt S. Effectiveness of distance learning strategies for continuing professional development (CPD) for rural allied health practitioners: a systematic review. *BMC Medical Education*. 2017;17(1).
  56. OCDE. Geographic Variations in Health Care 2014.
  57. Bertakis KD, Helms LJ, Callahan EJ, Azari R, Robbins JA. The influence of gender on physician practice style. *Med Care*. 1995;33(4):407-16.
  58. Carey RN, Connell LE, Johnston M, Rothman AJ, de Bruin M, Kelly MP, et al. Behavior Change Techniques and Their Mechanisms of Action: A Synthesis of Links Described in Published Intervention Literature. *Annals of Behavioral Medicine*. 2018;53(8):693-707.
  59. Etherington N, Rodrigues IB, Giangregorio L, Graham ID, Hoens AM, Kasperavicius D, et al. Applying an intersectionality lens to the theoretical domains framework: a tool for thinking about how intersecting social identities and structures of power influence behaviour. *BMC Medical Research Methodology*. 2020;20(1).



- 1  
2  
3  
4  
5  
6  
7  
8  
9  
10  
11  
12  
13  
14  
15  
16  
17  
18  
19  
20  
21  
22  
23  
24  
25  
26  
27  
28  
29  
30  
31  
32  
33  
34  
35  
36  
37  
38  
39  
40  
41  
42  
43  
44  
45  
46  
47  
48  
49  
50  
51  
52  
53  
54  
55  
56  
57  
58  
59  
60
60. Guly HR. Continuing professional development for doctors in accident and emergency. *Journal of Accident & Emergency Medicine*. 2000;17(1):12-4.
61. Peek ME. Gender differences in diabetes-related lower extremity amputations. *Clinical orthopaedics and related research*. 2011;469(7):1951-5.
62. Weziak-Bialowolska D. Differences in Gender Norms Between Countries: Are They Valid? The Issue of Measurement Invariance. *European journal of population = Revue europeenne de demographie*. 2015;31(1):51-76.
63. Macdermid JC, Graham ID. Knowledge Translation: Putting the “Practice” in Evidence-Based Practice. *Hand Clinics*. 2009;25(1):125-43.
64. Eccles MP, Hrisos S, Francis J, Kaner EF, Dickinson HO, Beyer F, et al. Do self-reported intentions predict clinicians' behaviour: a systematic review. *Implementation Science*. 2006;1(1).
65. Wakefield J, Herbert CP, Maclure M, Dormuth C, Wright JM, Legare J, et al. Commitment to change statements can predict actual change in practice. *The Journal of continuing education in the health professions*. 2003;23(2):81-93.
66. van Braak M, Visser M, Holtrop M, Stadius Muller I, Bont J, van Dijk N. What motivates general practitioners to change practice behaviour? A qualitative study of audit and feedback group sessions in Dutch general practice. *BMJ open*. 2019;9(5):e025286.

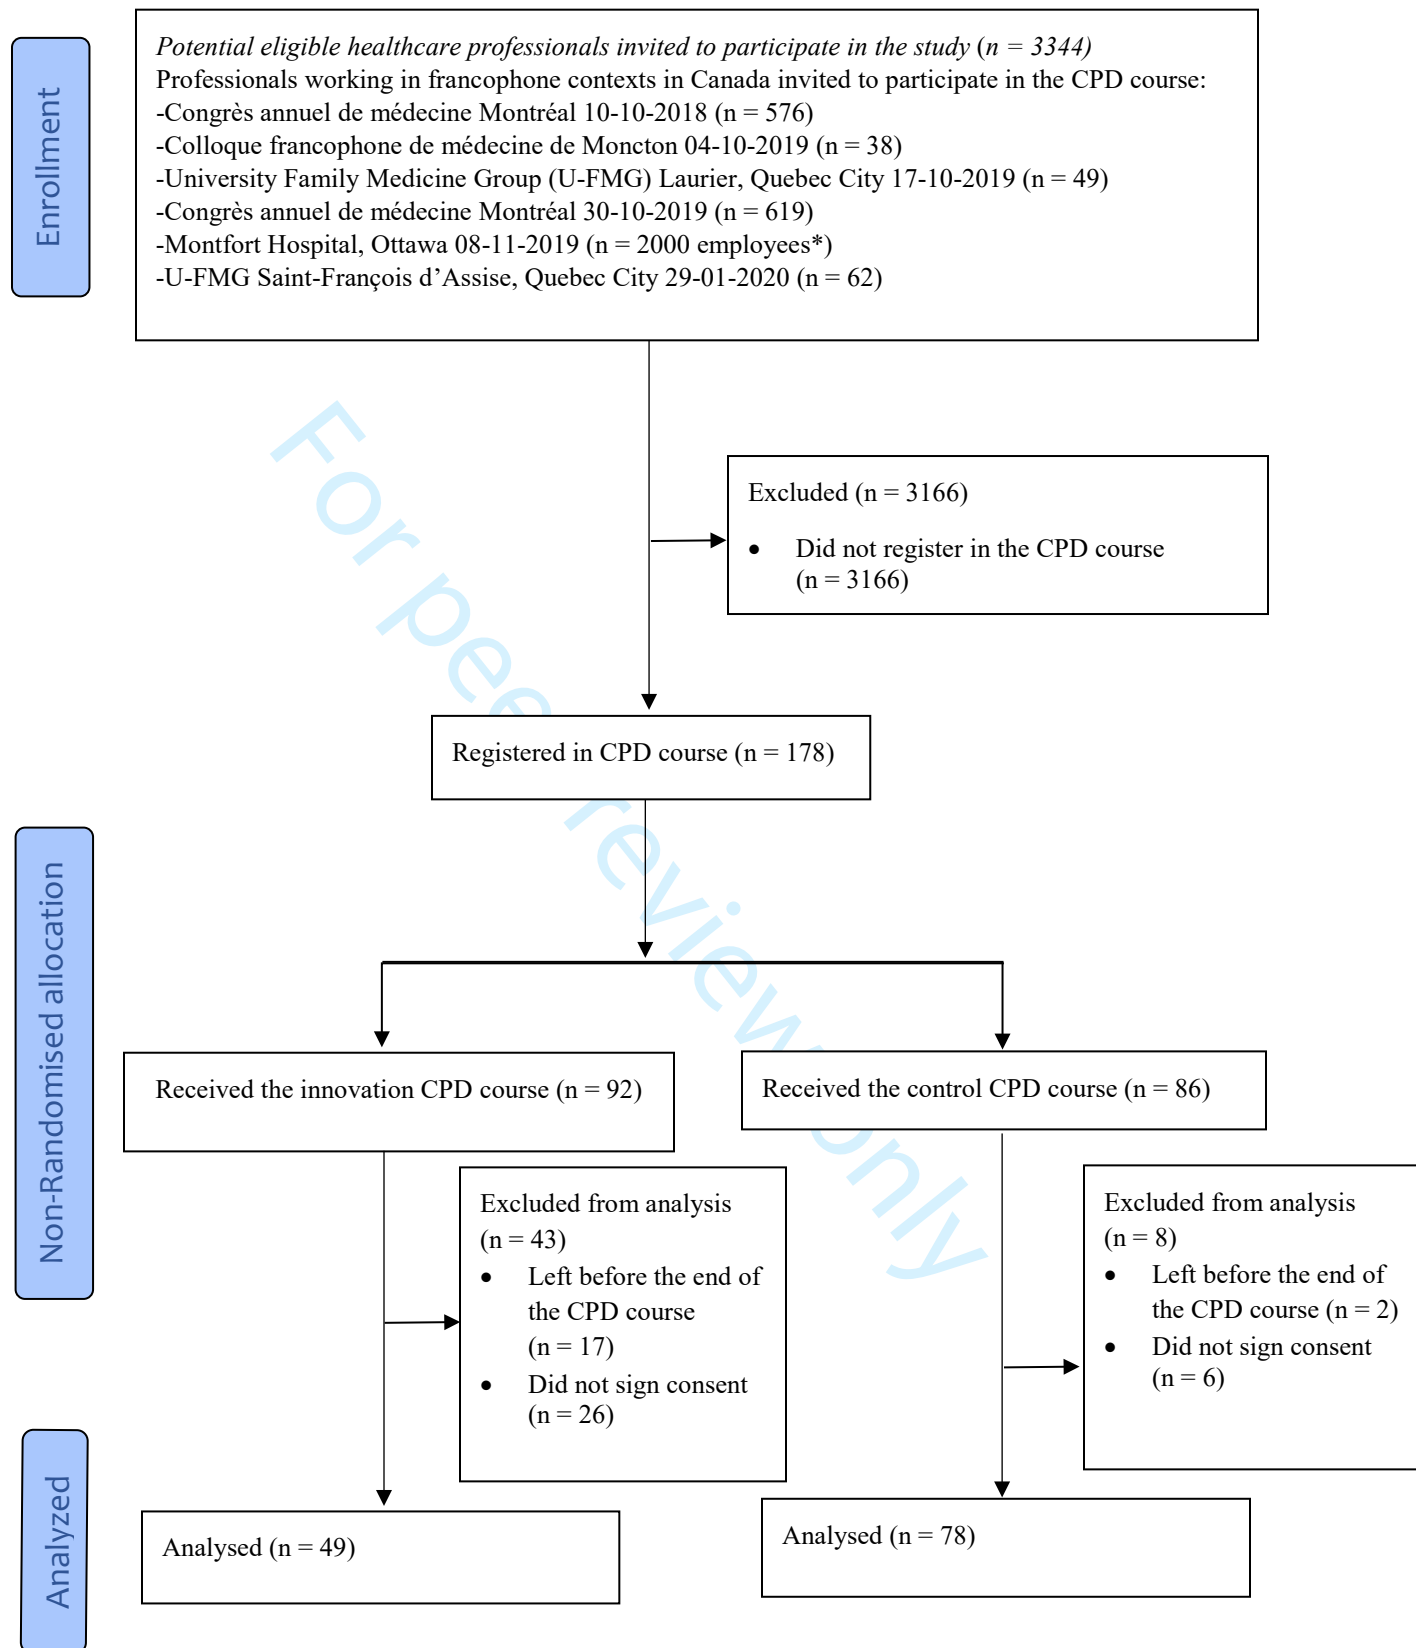

**Supplementary table 1:** Distribution of the scores of intention to include sex and gender considerations in patient care in the clinical context of T2D and depression

|                                | Parametric estimation* |           |                          |              | Non-parametric estimation† |                   |              |
|--------------------------------|------------------------|-----------|--------------------------|--------------|----------------------------|-------------------|--------------|
|                                | Innovation             | Control   | Mean difference (95% CI) | PValue‡      | Innovation                 | Control           | P Value‡     |
| <b>No. of participants</b>     | 49                     | 78        |                          |              | 49                         | 78                |              |
| <b>Total</b>                   | 5.65±0.19              | 5.19±0.15 | -0.47 (-0.95; 0.01)      | 0.057        | 5.50 (5.00; 6.50)          | 5.50 (4.50; 6.00) | 0.162        |
| <b>Age (years)</b>             |                        |           |                          |              |                            |                   |              |
| < 44                           | 5.68±0.25              | 5.30±0.18 | -0.38 (-1.00; 0.24)      | 0.226        | 5.50 (5.00; 6.50)          | 5.50 (5.00; 6.50) | 0.717        |
| ≥ 45                           | 5.92±0.29              | 4.93±0.26 | -0.99 (-1.78; -0.20)     | <b>0.016</b> | 6.00 (5.00; 6.50)          | 5.50 (3.50; 6.00) | <b>0.029</b> |
| <b>Gender</b>                  |                        |           |                          |              |                            |                   |              |
| Men                            | 5.79±0.45              | 4.79±0.34 | -0.99 (-2.19; 0.20)      | 0.098        | 6.00 (5.00; 6.50)          | 5.25 (3.50; 6.00) | 0.070        |
| Women                          | 5.78±0.21              | 5.24±0.17 | -0.54 (-1.08; 0.00)      | 0.051        | 5.50 (5.00; 6.50)          | 5.50 (4.50; 6.50) | 0.245        |
| <b>Language</b>                |                        |           |                          |              |                            |                   |              |
| French                         | 5.81±0.20              | 5.35±0.16 | -0.46 (-0.97; 0.05)      | 0.073        | 6.00 (5.00; 6.50)          | 5.50 (4.50; 6.00) | 0.133        |
| Other                          | 5.70±0.42              | 4.76±0.35 | -0.94 (-2.05; 0.17)      | 0.096        | 5.50 (5.00; 6.50)          | 5.50 (4.50; 6.00) | 0.346        |
| <b>Province of practice</b>    |                        |           |                          |              |                            |                   |              |
| Quebec                         | 5.85±0.20              | 5.43±0.15 | -0.43 (-0.94; 0.08)      | 0.097        | 6.00 (5.00; 6.50)          | 5.50 (5.00; 6.50) | 0.144        |
| Ontario                        | 5.83±0.43              | 4.89±0.43 | -0.94 (-2.23; 0.34)      | 0.138        | 6.00 (5.00; 6.50)          | 5.00 (4.50; 6.00) | 0.223        |
| New Brunswick                  | 5.36±0.73              | 4.00±0.64 | -1.36 (-3.44; 0.72)      | 0.184        | 5.50 (5.00; 5.50)          | 4.00 (1.00; 6.00) | 0.512        |
| <b>Environment of practice</b> |                        |           |                          |              |                            |                   |              |

|    |       |           |           |          |       |        |             |              |
|----|-------|-----------|-----------|----------|-------|--------|-------------|--------------|
| 1  |       |           |           |          |       |        |             |              |
| 2  |       |           |           |          |       |        |             |              |
| 3  | Urban | 5.74±0.20 | 5.37±0.16 | -0.37 (- | 0.143 | 5.50   | 5.50 (5.00; | 0.486        |
| 4  |       |           |           | 0.88;    |       | (5.00; | 6.50)       |              |
| 5  |       |           |           | 0.13)    |       | 6.50)  |             |              |
| 6  | Rural | 6.38±0.87 | 4.45±0.55 | -1.93 (- | 0.086 | 6.25   | 5.25 (3.50; | <b>0.018</b> |
| 7  |       |           |           | 4.17;    |       | (6.00; | 6.00)       |              |
| 8  |       |           |           | 0.32)    |       | 6.75)  |             |              |
| 9  |       |           |           |          |       |        |             |              |
| 10 |       |           |           |          |       |        |             |              |

---

\*Mean±standard deviation;

†Median (25<sup>th</sup> percentile; 75<sup>th</sup> percentile);

‡Derived from the general linear models;

‡Derived from the Kruskal-Wallis (Wilcoxon) test

For peer review only

**Supplementary table 2:** Recommendations for improving the CPD training, based on barriers and facilitators, using the COM-B model, the Theoretical Domains Framework and the CPD-Reaction questionnaire

| COM-B criteria     | COM-B criteria subcategory | TDF domains linked to COM-B         | Barriers and facilitators perceived by health professionals to including sex and gender considerations in their clinical practice                                   | Psychosocial determinants of the CPD-Reaction questionnaire | Recommendations (COM-B Intervention function)                                                                                                                                                                                                                      |
|--------------------|----------------------------|-------------------------------------|---------------------------------------------------------------------------------------------------------------------------------------------------------------------|-------------------------------------------------------------|--------------------------------------------------------------------------------------------------------------------------------------------------------------------------------------------------------------------------------------------------------------------|
| <b>Opportunity</b> |                            |                                     |                                                                                                                                                                     |                                                             |                                                                                                                                                                                                                                                                    |
|                    | Social                     | Social influence                    | Health professionals assume the patient's gender based on his/her societal role (Barrier)                                                                           | Social influence                                            | In the CPD course, a clinical case vignette could demonstrate the integration of sex and gender considerations and reflect on the different social stigmas associated with gender (Modelling)                                                                      |
|                    | Physical                   | Environmental context and resources | The patient's sex is routinely recorded in medical notes (Facilitator)                                                                                              |                                                             | CPD training could expand on routine practices that already include sex and gender in clinical practice, example: recording sex, but going further by asking questions about perceived gender, sexual orientation (Training)                                       |
|                    |                            |                                     | The androcentric nature of the French language (the use of masculine generic language to refer to men and women, as well as other gender representations) (Barrier) |                                                             | CPD training could give prompts/cues to demonstrate sex- and gender-sensitive medical language (e.g. revised forms, gender sensitive formulation of questions on sexuality and relationships) to promote equity in clinical practice (Environmental restructuring) |
|                    |                            |                                     | The healthcare professional perceives that the language used by physicians towards a patient may be                                                                 |                                                             | The CPD training could encourage health professionals to self-monitor their use of gender inclusive language (Training/Enablement)                                                                                                                                 |
|                    |                            |                                     |                                                                                                                                                                     |                                                             | CPD training could demonstrate sex- and gender-sensitive behaviours and patterns of speech through video animations of clinical visits between health professionals and their                                                                                      |

1  
2  
3  
4  
5  
6  
7  
8  
9  
10  
11  
12  
13  
14  
15  
16  
17  
18  
19  
20  
21  
22  
23  
24  
25  
26  
27  
28  
29  
30  
31  
32  
33  
34  
35  
36  
37  
38  
39  
40  
41  
42  
43  
44  
45  
46  
47  
48  
49  
50  
51  
52  
53  
54  
55  
56  
57  
58  
59  
60

|                   |                                                                                                                                          |                                                                                                                                               |                                                 |                                                                                                                                                                                                                                              |                                                                                                                                                                                                                                                                  |
|-------------------|------------------------------------------------------------------------------------------------------------------------------------------|-----------------------------------------------------------------------------------------------------------------------------------------------|-------------------------------------------------|----------------------------------------------------------------------------------------------------------------------------------------------------------------------------------------------------------------------------------------------|------------------------------------------------------------------------------------------------------------------------------------------------------------------------------------------------------------------------------------------------------------------|
|                   |                                                                                                                                          |                                                                                                                                               | different according to sex and gender (Barrier) |                                                                                                                                                                                                                                              | patients, as well as showing various health professional and patient scenarios (Training)                                                                                                                                                                        |
| <b>Motivation</b> |                                                                                                                                          |                                                                                                                                               |                                                 |                                                                                                                                                                                                                                              |                                                                                                                                                                                                                                                                  |
| Reflective        | Social and professional role and identity                                                                                                | The health professional reflects positively on his/her relationship with the patient (Facilitator)                                            |                                                 |                                                                                                                                                                                                                                              |                                                                                                                                                                                                                                                                  |
|                   | Beliefs about capabilities                                                                                                               | The health professional feels he/she can accurately observe the phenotype of the patient (Facilitator)                                        | Beliefs about capabilities                      |                                                                                                                                                                                                                                              | Self-monitoring of behaviour to encourage health professionals to analyse how they record patient phenotypes: what do they take into consideration? Do they ask specific questions or is it strictly observational? (Enablement)                                 |
|                   | Intentions                                                                                                                               | The health professional has the intention to change his/her therapeutic approach by considering the differences of gender (Facilitator)       | Intention                                       |                                                                                                                                                                                                                                              | Enable health professionals to change their behaviour by demonstrating strategies they have already undertaken to consider the sex of the patient during their therapeutic approaches (Modelling)                                                                |
|                   |                                                                                                                                          | The health professional does not have the intention to change his/her therapeutic approach by considering the differences of gender (Barrier) |                                                 |                                                                                                                                                                                                                                              | Offer information about social consequences of not modifying their care to include sex and gender considerations (Education)<br><br>Offer information about health consequences of not modifying their care to include sex and gender considerations (Education) |
| Goals             | The health professional does not perceive the integration of the concepts of sex and gender in clinical practice as a priority (Barrier) |                                                                                                                                               |                                                 | Enable participants to engage in action planning to include sex and gender considerations in their clinical practice, as well as implementation intentions (Enablement)<br><br>Enable participants to engage in specific goal setting on how |                                                                                                                                                                                                                                                                  |

1  
2  
3  
4  
5  
6  
7  
8  
9  
10  
11  
12  
13  
14  
15  
16  
17  
18  
19  
20  
21  
22  
23  
24  
25  
26  
27  
28  
29  
30  
31  
32  
33  
34  
35  
36  
37  
38  
39  
40  
41  
42  
43  
44  
45  
46  
47  
48  
49  
50  
51  
52  
53  
54  
55  
56  
57  
58  
59  
60

|                   |               |                                          |                                                                                                                                     |                            |                                                                                                                                                                                                                                                                                                            |
|-------------------|---------------|------------------------------------------|-------------------------------------------------------------------------------------------------------------------------------------|----------------------------|------------------------------------------------------------------------------------------------------------------------------------------------------------------------------------------------------------------------------------------------------------------------------------------------------------|
|                   |               |                                          |                                                                                                                                     |                            | they would include sex and gender considerations in their clinical practice (Goal setting)                                                                                                                                                                                                                 |
|                   |               | Beliefs about consequences               | The health professional mentions that they would not change their therapeutic approach according to the patient's gender (Barrier)  | Beliefs about consequences | Offer CPD content with credible sources about the health consequences of not modifying their care to include sex and gender considerations (Education)<br><br>Demonstration of various techniques, shared decision making, cues and prompts that include sex and gender considerations in care (Modelling) |
| <b>Capability</b> |               |                                          |                                                                                                                                     |                            |                                                                                                                                                                                                                                                                                                            |
|                   | Psychological | Memory, Attention and Decision Processes | The health professional perceives that sex and gender are not systematic in the decision-making process (Barrier)                   |                            | Offer specific training to create routine and habit formation that encourages the systematic inclusion of sex and gender considerations in the decision-making process (Training)                                                                                                                          |
|                   |               | Cognitive and interpersonal skills       | The health professional does not assume the sex of the patient and acknowledges different treatment methods by gender (Facilitator) |                            |                                                                                                                                                                                                                                                                                                            |
|                   |               |                                          | The health professional acknowledges different clinical representation by gender (Facilitator)                                      |                            |                                                                                                                                                                                                                                                                                                            |
|                   |               |                                          | The health professional assumed the gender of the patient when analyzing a clinical vignette (Barrier)                              |                            | As part of skills training, the CPD training could demonstrate how to explore the different aspects of sex attribution, without assuming the sex of the patient (Training)<br><br>Give specific instructions on how to explore the different aspects of sex attribution,                                   |

1  
2  
3  
4  
5  
6  
7  
8  
9  
10  
11  
12  
13  
14  
15  
16  
17  
18  
19  
20  
21  
22  
23  
24  
25  
26  
27  
28  
29  
30  
31  
32  
33  
34  
35  
36  
37  
38  
39  
40  
41  
42  
43  
44  
45  
46  
47  
48  
49  
50  
51  
52  
53  
54  
55  
56  
57  
58  
59  
60

|  |  |           |                                                                                                                  |  |                                                                                                                                                                               |
|--|--|-----------|------------------------------------------------------------------------------------------------------------------|--|-------------------------------------------------------------------------------------------------------------------------------------------------------------------------------|
|  |  |           |                                                                                                                  |  | without assuming the sex of the patient (Training)                                                                                                                            |
|  |  |           |                                                                                                                  |  | Offer feedback on outcome(s) of assuming the sex of the patient in a clinical case vignette (Training)                                                                        |
|  |  |           |                                                                                                                  |  | Offer a practice/rehearsal period after receiving instructions on how to explore the different aspects of sex attribution, without assuming the sex of the patient (Training) |
|  |  | Knowledge | The health professional recognizes the differences between sex and gender in scientific literature (Facilitator) |  |                                                                                                                                                                               |
|  |  |           | The health professional did not ask the gender of the patient when analyzing a clinical vignette (Barrier)       |  | Include information on the possible clinical outcome(s) of assuming the wrong sex or gender of the patient (Education)                                                        |
|  |  |           | The health professional is not aware of the concepts of sex and gender (Barrier)                                 |  | Offer information about health consequences of not considering or confusing sex and gender terms (Education)                                                                  |





## CONSORT 2010 checklist of information to include when reporting a pilot or feasibility trial\*

| Section/Topic             | Item No | Checklist item                                                                                                                                                                              | Reported on page No |
|---------------------------|---------|---------------------------------------------------------------------------------------------------------------------------------------------------------------------------------------------|---------------------|
| <b>Title and abstract</b> |         |                                                                                                                                                                                             |                     |
|                           | 1a      | Identification as a pilot or feasibility randomised trial in the title                                                                                                                      | 1 (mixed methods)   |
|                           | 1b      | Structured summary of pilot trial design, methods, results, and conclusions (for specific guidance see CONSORT abstract extension for pilot trials)                                         | 4                   |
| <b>Introduction</b>       |         |                                                                                                                                                                                             |                     |
| Background and objectives | 2a      | Scientific background and explanation of rationale for future definitive trial, and reasons for randomised pilot trial                                                                      | 7-8                 |
|                           | 2b      | Specific objectives or research questions for pilot trial                                                                                                                                   | 8                   |
| <b>Methods</b>            |         |                                                                                                                                                                                             |                     |
| Trial design              | 3a      | Description of pilot trial design (such as parallel, factorial) including allocation ratio                                                                                                  | 8                   |
|                           | 3b      | Important changes to methods after pilot trial commencement (such as eligibility criteria), with reasons                                                                                    | NA                  |
| Participants              | 4a      | Eligibility criteria for participants                                                                                                                                                       | 9-10                |
|                           | 4b      | Settings and locations where the data were collected                                                                                                                                        | 9-10                |
|                           | 4c      | How participants were identified and consented                                                                                                                                              | 9-10                |
| Interventions             | 5       | The interventions for each group with sufficient details to allow replication, including how and when they were actually administered                                                       | 9-10-11             |
| Outcomes                  | 6a      | Completely defined prespecified assessments or measurements to address each pilot trial objective specified in 2b, including how and when they were assessed                                | 11-12               |
|                           | 6b      | Any changes to pilot trial assessments or measurements after the pilot trial commenced, with reasons                                                                                        | NA                  |
|                           | 6c      | If applicable, prespecified criteria used to judge whether, or how, to proceed with future definitive trial                                                                                 | NA                  |
| Sample size               | 7a      | Rationale for numbers in the pilot trial                                                                                                                                                    | 11                  |
|                           | 7b      | When applicable, explanation of any interim analyses and stopping guidelines                                                                                                                | NA                  |
| Randomisation:            |         |                                                                                                                                                                                             |                     |
| Sequence generation       | 8a      | Method used to generate the random allocation sequence                                                                                                                                      | NA                  |
|                           | 8b      | Type of randomisation(s); details of any restriction (such as blocking and block size)                                                                                                      | NA                  |
| Allocation concealment    | 9       | Mechanism used to implement the random allocation sequence (such as sequentially numbered containers), describing any steps taken to conceal the sequence until interventions were assigned | NA                  |

|                                                      |     |                                                                                                                                                                                       |          |
|------------------------------------------------------|-----|---------------------------------------------------------------------------------------------------------------------------------------------------------------------------------------|----------|
| mechanism                                            |     |                                                                                                                                                                                       |          |
| Implementation                                       | 10  | Who generated the random allocation sequence, who enrolled participants, and who assigned participants to interventions                                                               | NA       |
| Blinding                                             | 11a | If done, who was blinded after assignment to interventions (for example, participants, care providers, those assessing outcomes) and how                                              | 10-11    |
|                                                      | 11b | If relevant, description of the similarity of interventions                                                                                                                           | 10-11    |
| Statistical methods                                  | 12  | Methods used to address each pilot trial objective whether qualitative or quantitative                                                                                                | 12-13    |
| <b>Results</b>                                       |     |                                                                                                                                                                                       |          |
| Participant flow (a diagram is strongly recommended) | 13a | For each group, the numbers of participants who were approached and/or assessed for eligibility, randomly assigned, received intended treatment, and were assessed for each objective | 14       |
|                                                      | 13b | For each group, losses and exclusions after randomisation, together with reasons                                                                                                      | 14       |
| Recruitment                                          | 14a | Dates defining the periods of recruitment and follow-up                                                                                                                               | 14       |
|                                                      | 14b | Why the pilot trial ended or was stopped                                                                                                                                              | NA       |
| Baseline data                                        | 15  | A table showing baseline demographic and clinical characteristics for each group                                                                                                      | 14-15    |
| Numbers analysed                                     | 16  | For each objective, number of participants (denominator) included in each analysis. If relevant, these numbers should be by randomised group                                          | 14-15-16 |
| Outcomes and estimation                              | 17  | For each objective, results including expressions of uncertainty (such as 95% confidence interval) for any estimates. If relevant, these results should be by randomised group        | 15-16-17 |
| Ancillary analyses                                   | 18  | Results of any other analyses performed that could be used to inform the future definitive trial                                                                                      | NA       |
| Harms                                                | 19  | All important harms or unintended effects in each group (for specific guidance see CONSORT for harms)                                                                                 | NA       |
|                                                      | 19a | If relevant, other important unintended consequences                                                                                                                                  | NA       |
| <b>Discussion</b>                                    |     |                                                                                                                                                                                       |          |
| Limitations                                          | 20  | Pilot trial limitations, addressing sources of potential bias and remaining uncertainty about feasibility                                                                             | 24-25    |
| Generalisability                                     | 21  | Generalisability (applicability) of pilot trial methods and findings to future definitive trial and other studies                                                                     | 24       |
| Interpretation                                       | 22  | Interpretation consistent with pilot trial objectives and findings, balancing potential benefits and harms, and considering other relevant evidence                                   | 22-23-24 |
|                                                      | 22a | Implications for progression from pilot to future definitive trial, including any proposed amendments                                                                                 | 23-24    |
| <b>Other information</b>                             |     |                                                                                                                                                                                       |          |
| Registration                                         | 23  | Registration number for pilot trial and name of trial registry                                                                                                                        | 5        |
| Protocol                                             | 24  | Where the pilot trial protocol can be accessed, if available                                                                                                                          | NA       |
| Funding                                              | 25  | Sources of funding and other support (such as supply of drugs), role of funders                                                                                                       | 27       |
|                                                      | 26  | Ethical approval or approval by research review committee, confirmed with reference number                                                                                            | 27       |

1 Citation: Eldridge SM, Chan CL, Campbell MJ, Bond CM, Hopewell S, Thabane L, et al. CONSORT 2010 statement: extension to randomised pilot and feasibility trials. BMJ. 2016;355.  
2  
3 \*We strongly recommend reading this statement in conjunction with the CONSORT 2010, extension to randomised pilot and feasibility trials, Explanation and Elaboration for important  
4 clarifications on all the items. If relevant, we also recommend reading CONSORT extensions for cluster randomised trials, non-inferiority and equivalence trials, non-pharmacological  
5 treatments, herbal interventions, and pragmatic trials. Additional extensions are forthcoming: for those and for up to date references relevant to this checklist, see [www.consort-statement.org](http://www.consort-statement.org).  
6  
7  
8  
9  
10  
11  
12  
13  
14  
15  
16  
17  
18  
19  
20  
21  
22  
23  
24  
25  
26  
27  
28  
29  
30  
31  
32  
33  
34  
35  
36  
37  
38  
39  
40  
41  
42

For peer review only
