# Supplementary material for: Integration of sex and gender in a continuing professional development course on diabetes and depression: a mixed methods feasibility study
Source: PubMed Central journal article supplement — BMJ Open. 2022 Apr 22;12(4):e050890. doi: 10.1136/bmjopen-2021-050890 (PMC9036429; doi:10.1136/bmjopen-2021-050890), 2022-04-22
Supplement: bmjopen-2021-050890supp001.pdf [file bmjopen-2021-050890supp001.pdf]

**Supplementary table 1:** Distribution of the scores of intention to include sex and gender considerations in patient care in the clinical context of T2D and depression

|                                | Parametric estimation* |           |                          |              | Non-parametric estimation† |                   |              |
|--------------------------------|------------------------|-----------|--------------------------|--------------|----------------------------|-------------------|--------------|
|                                | Innovation             | Control   | Mean difference (95% CI) | PValue‡      | Innovation                 | Control           | P Value‡     |
| <b>No. of participants</b>     | 49                     | 78        |                          |              | 49                         | 78                |              |
| <b>Total</b>                   | 5.65±0.19              | 5.19±0.15 | -0.47 (-0.95; 0.01)      | 0.057        | 5.50 (5.00; 6.50)          | 5.50 (4.50; .00)  | 0.162        |
| <b>Age (years)</b>             |                        |           |                          |              |                            |                   |              |
| < 44                           | 5.68±0.25              | 5.30±0.18 | -0.38 (-1.00; 0.24)      | 0.226        | 5.50 (5.00; 6.50)          | 5.50 (5.00; 6.50) | 0.717        |
| ≥ 45                           | 5.92±0.29              | 4.93±0.26 | -0.99 (-1.78; -0.20)     | <b>0.016</b> | 6.00 (5.00; 6.50)          | 5.50 (3.50; 6.00) | <b>0.029</b> |
| <b>Gender</b>                  |                        |           |                          |              |                            |                   |              |
| Men                            | 5.79±0.45              | 4.79±0.34 | -0.99 (-2.19; 0.20)      | 0.098        | 6.00 (5.00; 6.50)          | 5.25 (3.50; 6.00) | 0.070        |
| Women                          | 5.78±0.21              | 5.24±0.17 | -0.54 (-1.08; 0.00)      | 0.051        | 5.50 (5.00; 6.50)          | 5.50 (4.50; 6.50) | 0.245        |
| <b>Language</b>                |                        |           |                          |              |                            |                   |              |
| French                         | 5.81±0.20              | 5.35±0.16 | -0.46 (-0.97; 0.05)      | 0.073        | 6.00 (5.00; 6.50)          | 5.50 (4.50; 6.00) | 0.133        |
| Other                          | 5.70±0.42              | 4.76±0.35 | -0.94 (-2.05; 0.17)      | 0.096        | 5.50 (5.00; 6.50)          | 5.50 (4.50; 6.00) | 0.346        |
| <b>Province of practice</b>    |                        |           |                          |              |                            |                   |              |
| Quebec                         | 5.85±0.20              | 5.43±0.15 | -0.43 (-0.94; 0.08)      | 0.097        | 6.00 (5.00; 6.50)          | 5.50 (5.00; 6.50) | 0.144        |
| Ontario                        | 5.83±0.43              | 4.89±0.43 | -0.94 (-2.23; 0.34)      | 0.138        | 6.00 (5.00; 6.50)          | 5.00 (4.50; 6.00) | 0.223        |
| New Brunswick                  | 5.36±0.73              | 4.00±0.64 | -1.36 (-3.44; 0.72)      | 0.184        | 5.50 (5.00; 5.50)          | 4.00 (1.00; 6.00) | 0.512        |
| <b>Environment of practice</b> |                        |           |                          |              |                            |                   |              |

|       |           |           |                     |       |                   |                   |              |
|-------|-----------|-----------|---------------------|-------|-------------------|-------------------|--------------|
| Urban | 5.74±0.20 | 5.37±0.16 | -0.37 (-0.88; 0.13) | 0.143 | 5.50 (5.00; 6.50) | 5.50 (5.00; 6.50) | 0.486        |
| Rural | 6.38±0.87 | 4.45±0.55 | -1.93 (-4.17; 0.32) | 0.086 | 6.25 (6.00; 6.75) | 5.25 (3.50; 6.00) | <b>0.018</b> |

---

\*Mean±standard deviation;

†Median (25<sup>th</sup> percentile; 75<sup>th</sup> percentile);

‡Derived from the general linear models;

‡Derived from the Kruskal-Wallis (Wilcoxon) test

**Supplementary table 2:** Recommendations for improving the CPD training, based on barriers and facilitators, using the COM-B model, the Theoretical Domains Framework and the CPD-Reaction questionnaire

| COM-B criteria     | COM-B criteria subcategory | TDF domains linked to COM-B         | Barriers and facilitators perceived by health professionals to including sex and gender considerations in their clinical practice                                   | Psychosocial determinants of the CPD-Reaction questionnaire | Recommendations (COM-B Intervention function)                                                                                                                                                                                                                                                                                                                                                                |
|--------------------|----------------------------|-------------------------------------|---------------------------------------------------------------------------------------------------------------------------------------------------------------------|-------------------------------------------------------------|--------------------------------------------------------------------------------------------------------------------------------------------------------------------------------------------------------------------------------------------------------------------------------------------------------------------------------------------------------------------------------------------------------------|
| <b>Opportunity</b> |                            |                                     |                                                                                                                                                                     |                                                             |                                                                                                                                                                                                                                                                                                                                                                                                              |
|                    | Social                     | Social influence                    | Health professionals assume the patient's gender based on his/her societal role (Barrier)                                                                           | Social influence                                            | In the CPD course, a clinical case vignette could demonstrate the integration of sex and gender considerations and reflect on the different social stigmas associated with gender (Modelling)                                                                                                                                                                                                                |
|                    | Physical                   | Environmental context and resources | The patient's sex is routinely recorded in medical notes (Facilitator)                                                                                              |                                                             | CPD training could expand on routine practices that already include sex and gender in clinical practice, example: recording sex, but going further by asking questions about perceived gender, sexual orientation (Training)                                                                                                                                                                                 |
|                    |                            |                                     | The androcentric nature of the French language (the use of masculine generic language to refer to men and women, as well as other gender representations) (Barrier) |                                                             | CPD training could give prompts/cues to demonstrate sex- and gender-sensitive medical language (e.g. revised forms, gender sensitive formulation of questions on sexuality and relationships) to promote equity in clinical practice (Environmental restructuring)<br><br>The CPD training could encourage health professionals to self-monitor their use of gender inclusive language (Training/Enablement) |
|                    |                            |                                     | The healthcare professional perceives that the language used by physicians towards a patient may be                                                                 |                                                             | CPD training could demonstrate sex- and gender-sensitive behaviours and patterns of speech through video animations of clinical visits between health professionals and their                                                                                                                                                                                                                                |

|                   |            |                                           |                                                                                                                                               |                            |                                                                                                                                                                                                                                                                  |
|-------------------|------------|-------------------------------------------|-----------------------------------------------------------------------------------------------------------------------------------------------|----------------------------|------------------------------------------------------------------------------------------------------------------------------------------------------------------------------------------------------------------------------------------------------------------|
|                   |            |                                           | different according to sex and gender (Barrier)                                                                                               |                            | patients, as well as showing various health professional and patient scenarios (Training)                                                                                                                                                                        |
| <b>Motivation</b> |            |                                           |                                                                                                                                               |                            |                                                                                                                                                                                                                                                                  |
|                   | Reflective | Social and professional role and identity | The health professional reflects positively on his/her relationship with the patient (Facilitator)                                            |                            |                                                                                                                                                                                                                                                                  |
|                   |            | Beliefs about capabilities                | The health professional feels he/she can accurately observe the phenotype of the patient (Facilitator)                                        | Beliefs about capabilities | Self-monitoring of behaviour to encourage health professionals to analyse how they record patient phenotypes: what do they take into consideration? Do they ask specific questions or is it strictly observational? (Enablement)                                 |
|                   |            | Intentions                                | The health professional has the intention to change his/her therapeutic approach by considering the differences of gender (Facilitator)       | Intention                  | Enable health professionals to change their behaviour by demonstrating strategies they have already undertaken to consider the sex of the patient during their therapeutic approaches (Modelling)                                                                |
|                   |            |                                           | The health professional does not have the intention to change his/her therapeutic approach by considering the differences of gender (Barrier) |                            | Offer information about social consequences of not modifying their care to include sex and gender considerations (Education)<br><br>Offer information about health consequences of not modifying their care to include sex and gender considerations (Education) |
|                   |            | Goals                                     | The health professional does not perceive the integration of the concepts of sex and gender in clinical practice as a priority (Barrier)      |                            | Enable participants to engage in action planning to include sex and gender considerations in their clinical practice, as well as implementation intentions (Enablement)<br><br>Enable participants to engage in specific goal setting on how                     |

|                   |               |                                          |                                                                                                                                     |                            |                                                                                                                                                                                                                                                                                                            |
|-------------------|---------------|------------------------------------------|-------------------------------------------------------------------------------------------------------------------------------------|----------------------------|------------------------------------------------------------------------------------------------------------------------------------------------------------------------------------------------------------------------------------------------------------------------------------------------------------|
|                   |               |                                          |                                                                                                                                     |                            | they would include sex and gender considerations in their clinical practice (Goal setting)                                                                                                                                                                                                                 |
|                   |               | Beliefs about consequences               | The health professional mentions that they would not change their therapeutic approach according to the patient's gender (Barrier)  | Beliefs about consequences | Offer CPD content with credible sources about the health consequences of not modifying their care to include sex and gender considerations (Education)<br><br>Demonstration of various techniques, shared decision making, cues and prompts that include sex and gender considerations in care (Modelling) |
| <b>Capability</b> |               |                                          |                                                                                                                                     |                            |                                                                                                                                                                                                                                                                                                            |
|                   | Psychological | Memory, Attention and Decision Processes | The health professional perceives that sex and gender are not systematic in the decision-making process (Barrier)                   |                            | Offer specific training to create routine and habit formation that encourages the systematic inclusion of sex and gender considerations in the decision-making process (Training)                                                                                                                          |
|                   |               | Cognitive and interpersonal skills       | The health professional does not assume the sex of the patient and acknowledges different treatment methods by gender (Facilitator) |                            |                                                                                                                                                                                                                                                                                                            |
|                   |               |                                          | The health professional acknowledges different clinical representation by gender (Facilitator)                                      |                            |                                                                                                                                                                                                                                                                                                            |
|                   |               |                                          | The health professional assumed the gender of the patient when analyzing a clinical vignette (Barrier)                              |                            | As part of skills training, the CPD training could demonstrate how to explore the different aspects of sex attribution, without assuming the sex of the patient (Training)<br><br>Give specific instructions on how to explore the different aspects of sex attribution,                                   |

|  |                                                                                                            |           |                                                                                                                  |                                                                                                                        |                                                                                                                                                                                                                                                                                                                                                              |
|--|------------------------------------------------------------------------------------------------------------|-----------|------------------------------------------------------------------------------------------------------------------|------------------------------------------------------------------------------------------------------------------------|--------------------------------------------------------------------------------------------------------------------------------------------------------------------------------------------------------------------------------------------------------------------------------------------------------------------------------------------------------------|
|  |                                                                                                            |           |                                                                                                                  |                                                                                                                        | <p>without assuming the sex of the patient (Training)</p> <p>Offer feedback on outcome(s) of assuming the sex of the patient in a clinical case vignette (Training)</p> <p>Offer a practice/rehearsal period after receiving instructions on how to explore the different aspects of sex attribution, without assuming the sex of the patient (Training)</p> |
|  |                                                                                                            | Knowledge | The health professional recognizes the differences between sex and gender in scientific literature (Facilitator) |                                                                                                                        |                                                                                                                                                                                                                                                                                                                                                              |
|  | The health professional did not ask the gender of the patient when analyzing a clinical vignette (Barrier) |           |                                                                                                                  | Include information on the possible clinical outcome(s) of assuming the wrong sex or gender of the patient (Education) |                                                                                                                                                                                                                                                                                                                                                              |
|  | The health professional is not aware of the concepts of sex and gender (Barrier)                           |           |                                                                                                                  | Offer information about health consequences of not considering or confusing sex and gender terms (Education)           |                                                                                                                                                                                                                                                                                                                                                              |
